# Supplementary material
Source: publisher site journal article supplement (https://www.dovepress.com/article/442231)
Supplement: Supplementary file 1 [file get_supplementary_file.php]

## Supplementary Figures

### Supplementary Figure 1

Scatter plot and leave-one-out plot of long sleep and PrRP associations with overlay of causal estimate in two-sample MR analysis

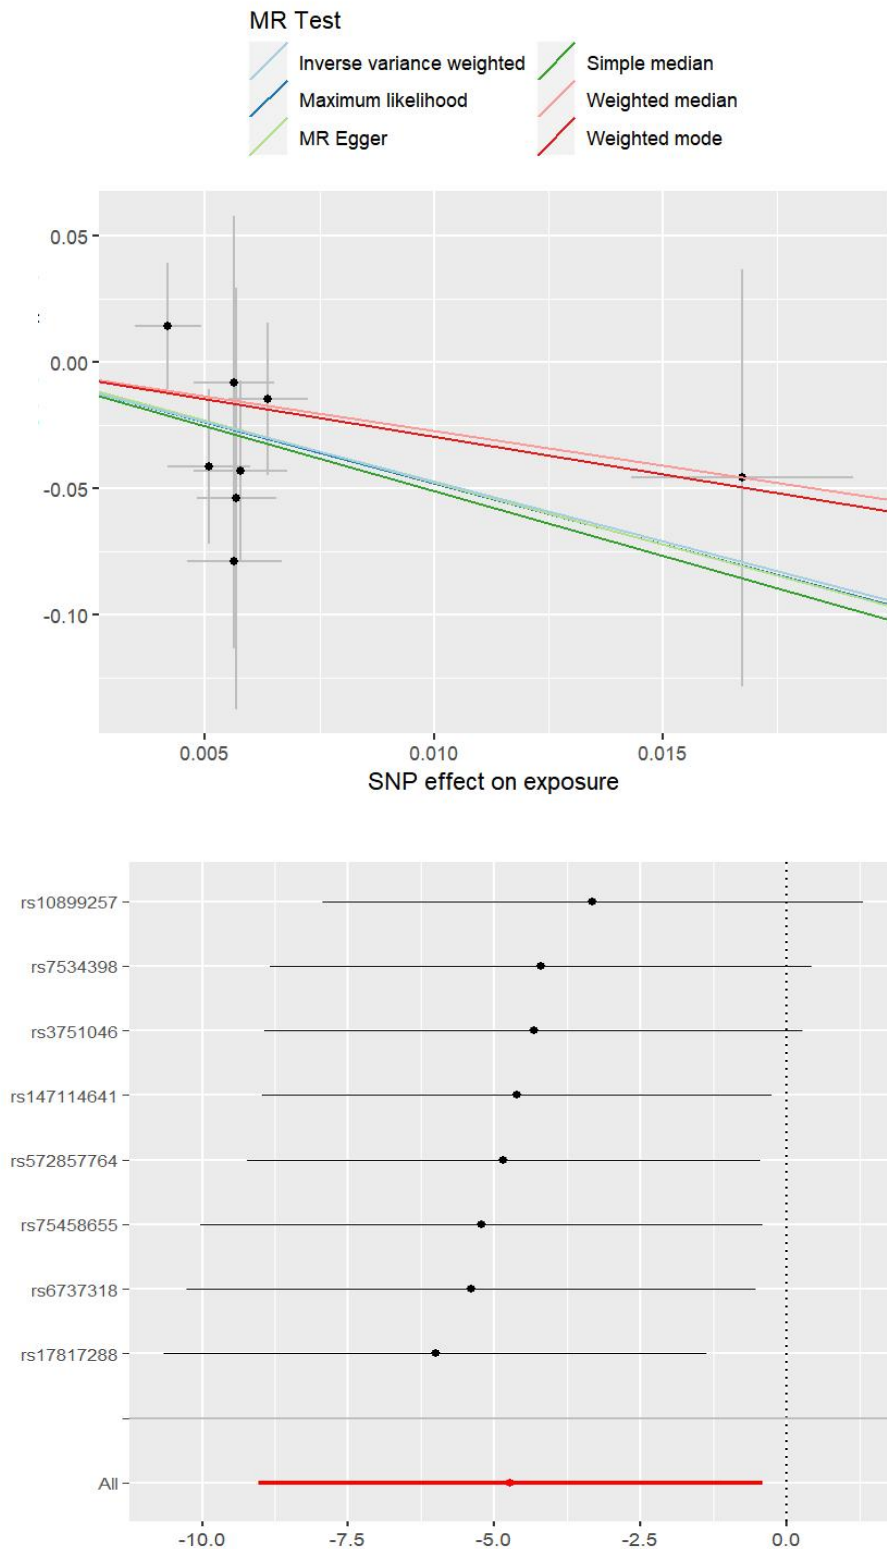

Supplementary Figure 2

Scatter plot and leave-one-out plot of short sleep and PrRP associations with overlay of causal estimate in two-sample MR analysis

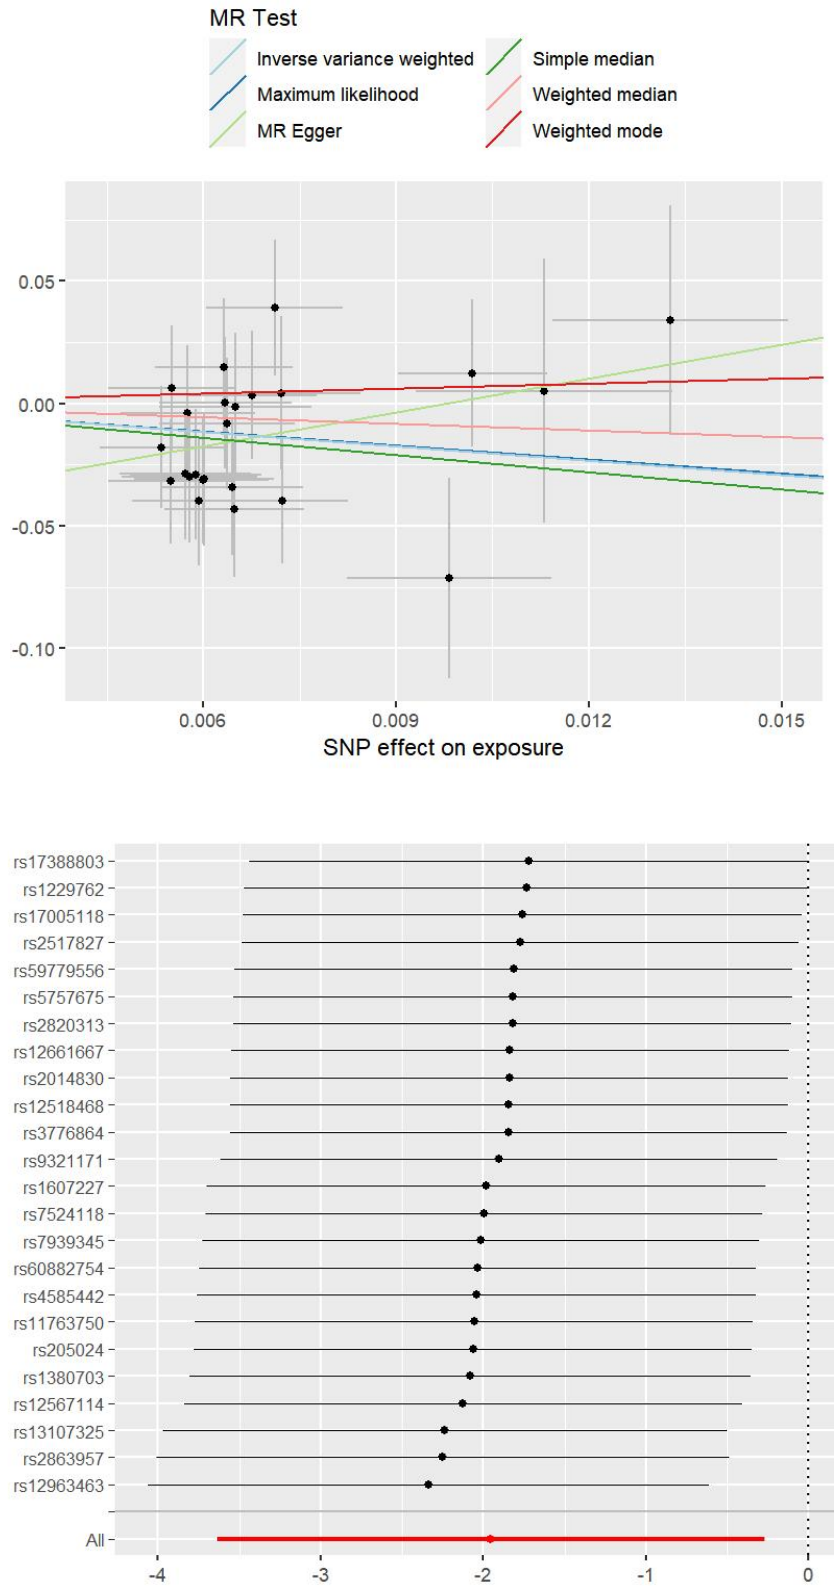

### Supplementary Figure 3

Scatter plot and leave-one-out plot of chronotype and CRFBP associations with overlay of causal estimate in two-sample MR analysis

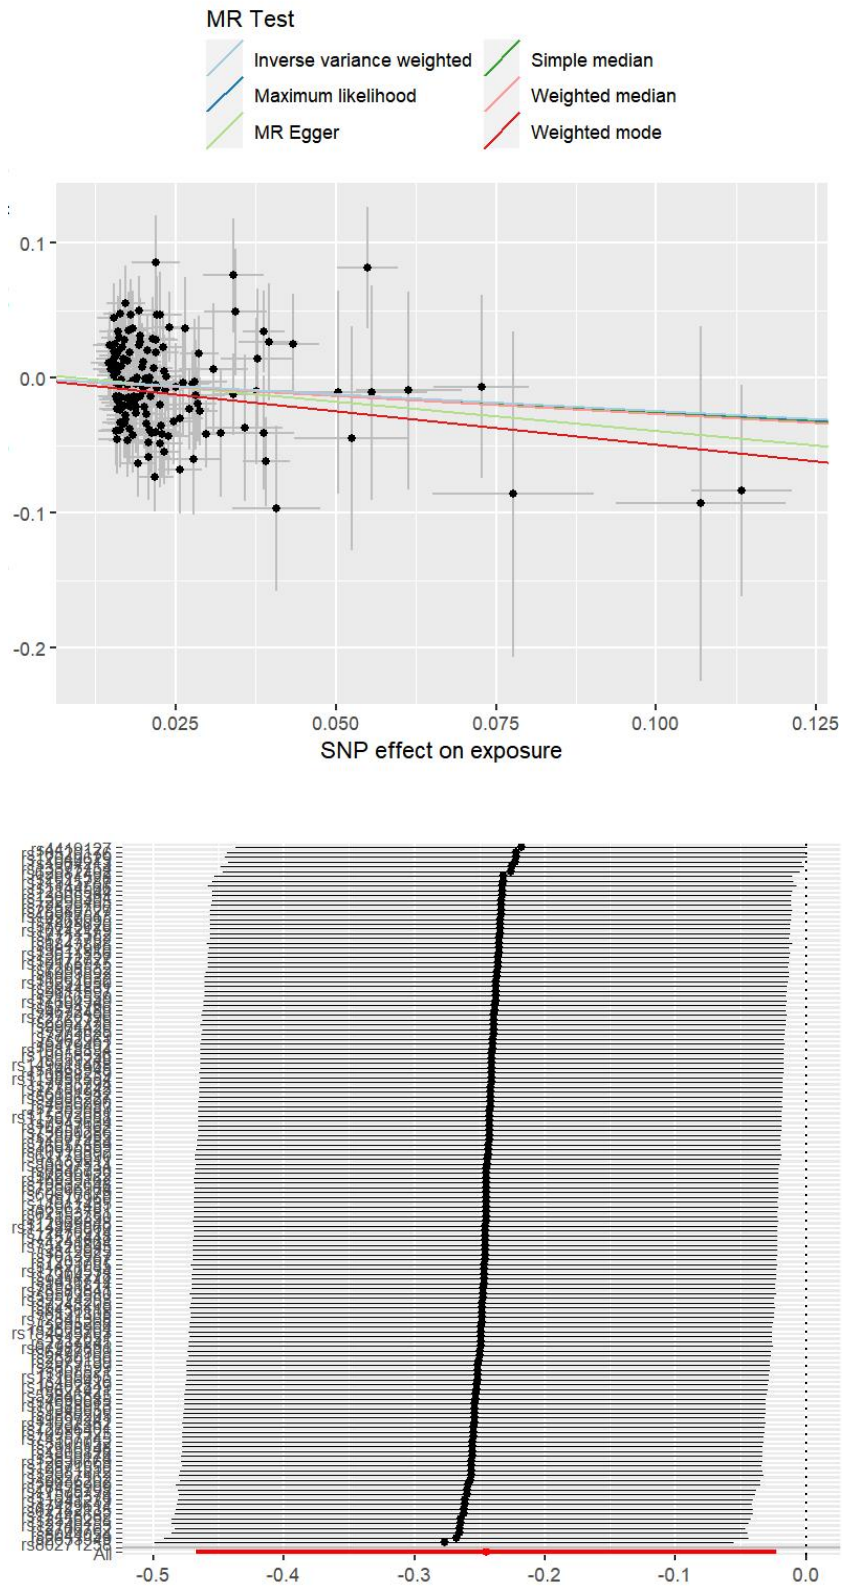

Supplementary Figure 4

Scatter plot and leave-one-out plot of long sleep and SRIF associations with overlay of causal estimate in two-sample MR analysis

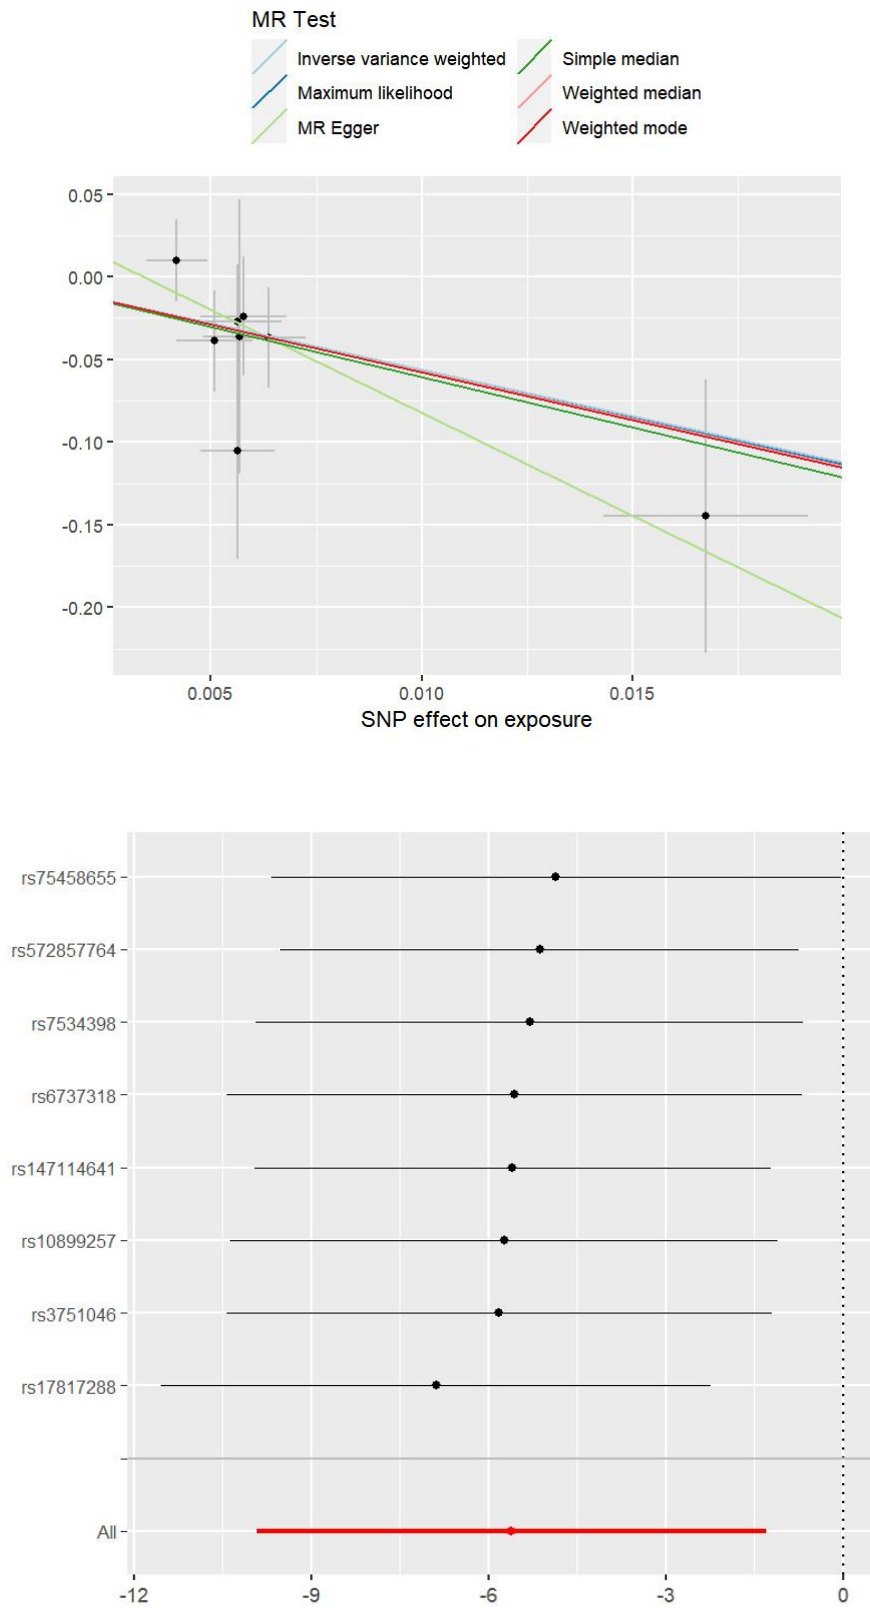

### Supplementary Figure 5

Scatter plot and leave-one-out plot of sleep duration and FT4 associations with overlay of causal estimate in two-sample MR analysis

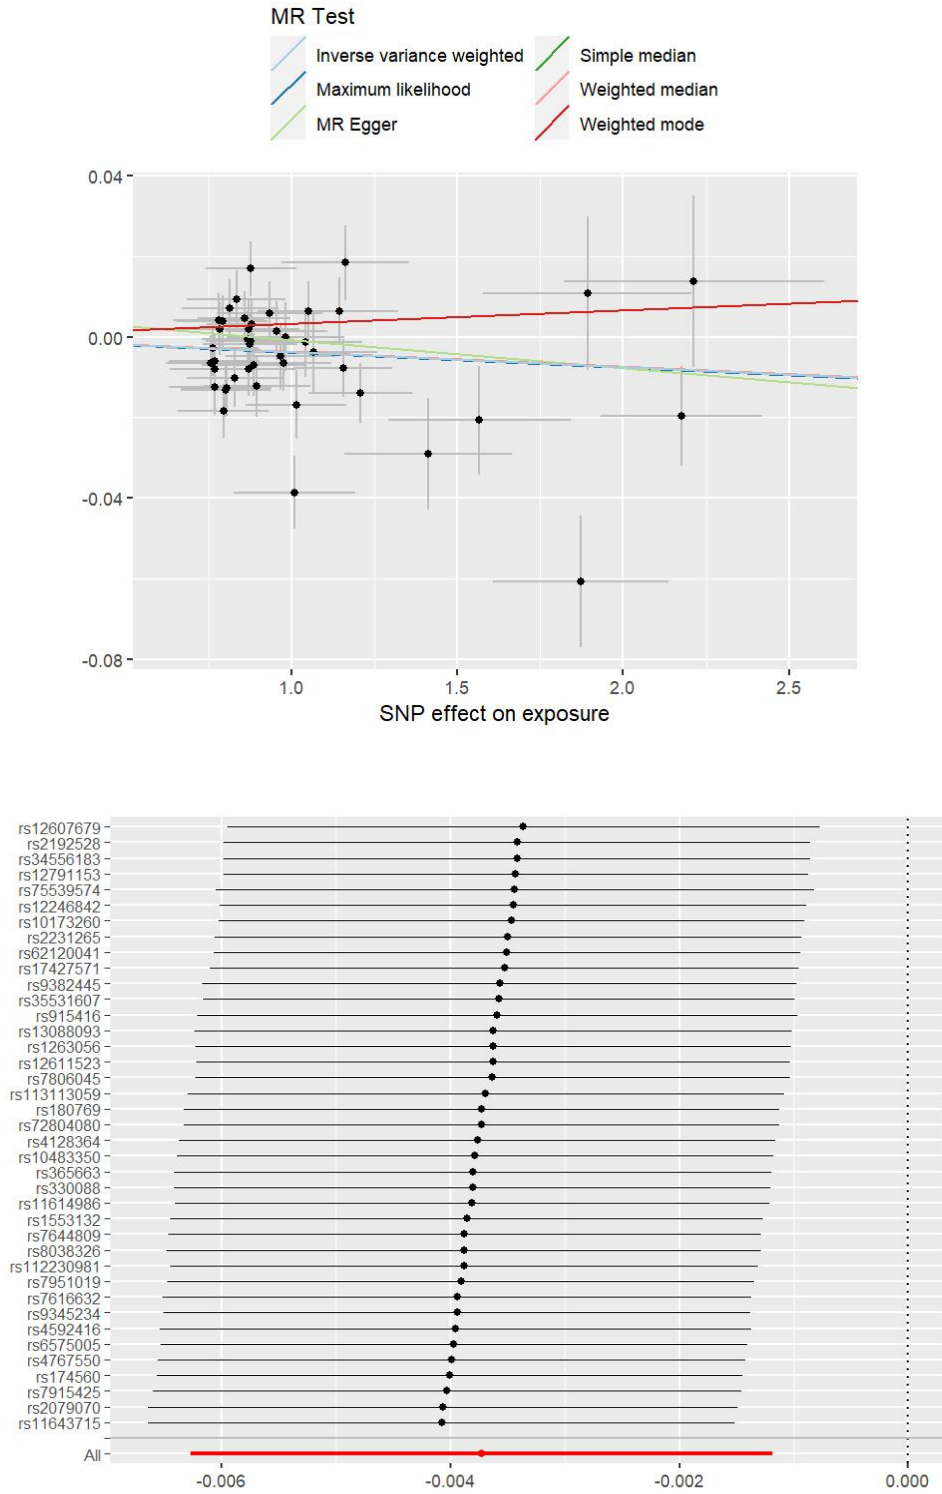

Supplementary Figure 6

Scatter plot and leave-one-out plot of long sleep and TPO associations with overlay of causal estimate in two-sample MR analysis

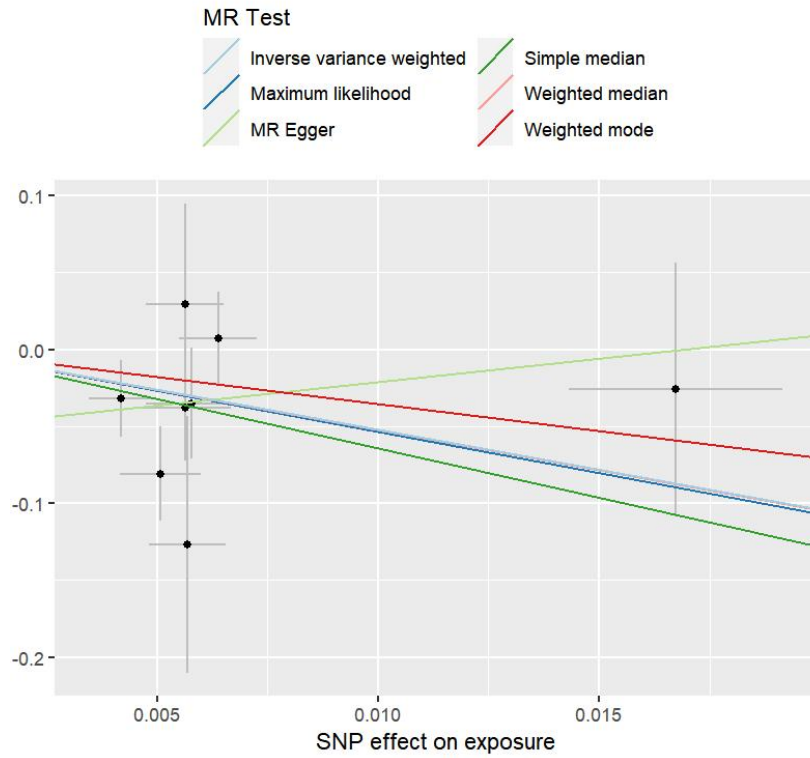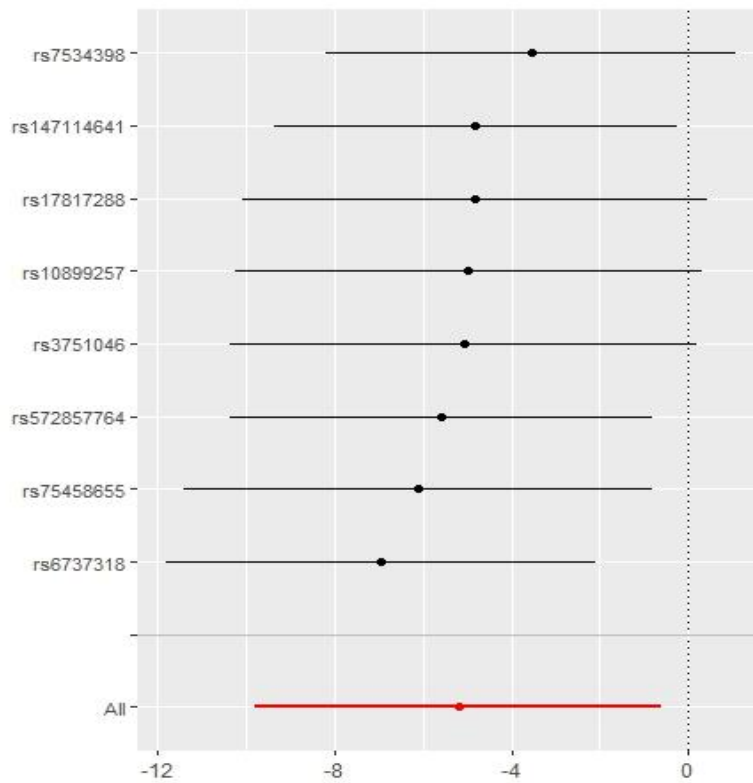

Supplementary Figure 7

Scatter plot and leave-one-out plot of chronotype and plasma cortisol associations with overlay of causal estimate in two-sample MR analysis

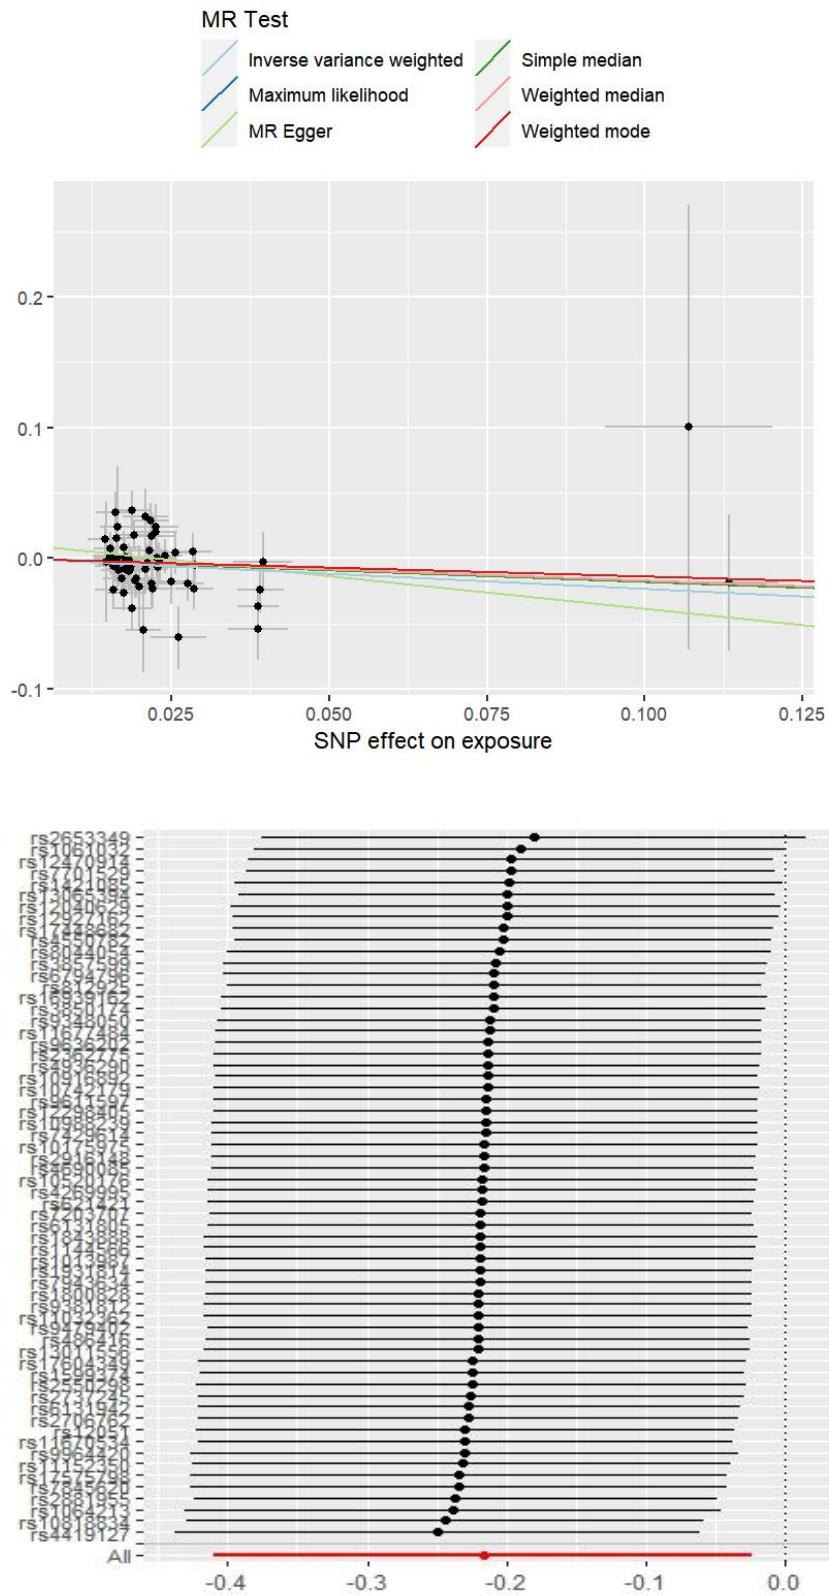

### Supplementary Figure 8

Scatter plot and leave-one-out plot of short sleep and plasma cortisol associations with overlay of causal estimate in two-sample MR analysis

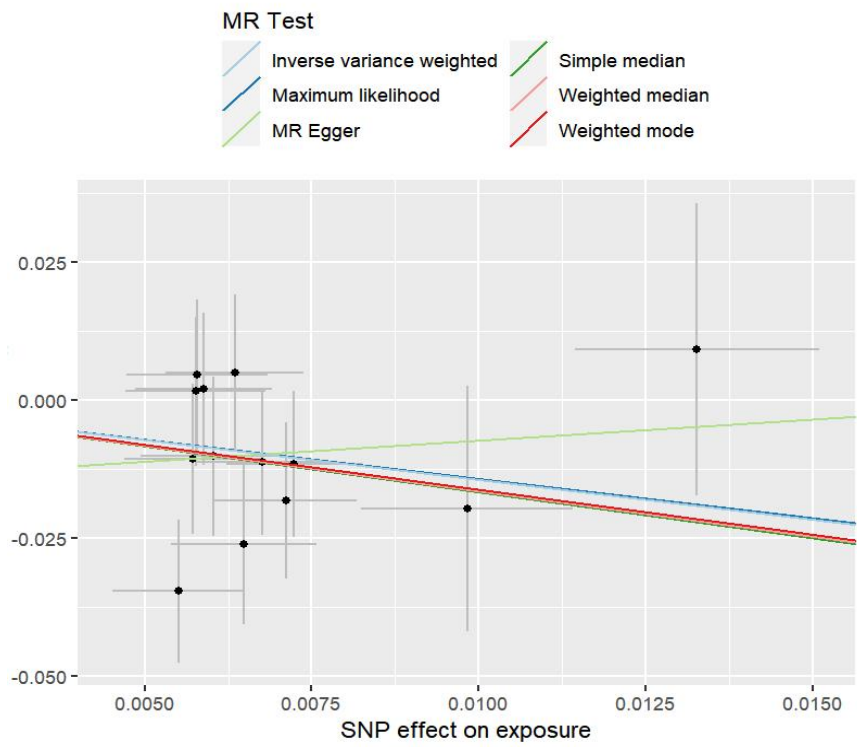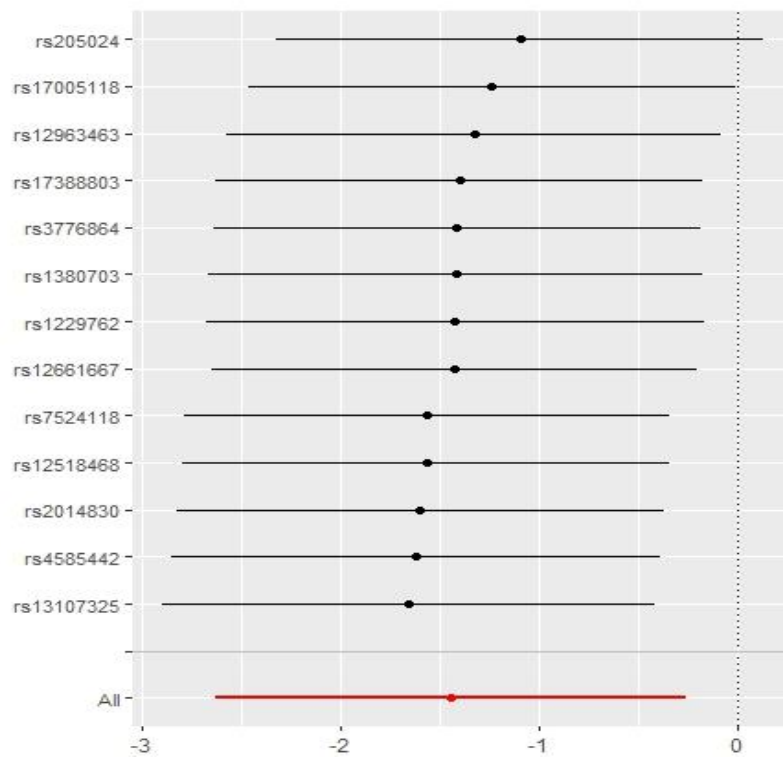



Supplementary Figure 9

Scatter plot and leave-one-out plot of sleep duration and P4 associations with overlay of causal estimate in two-sample MR analysis

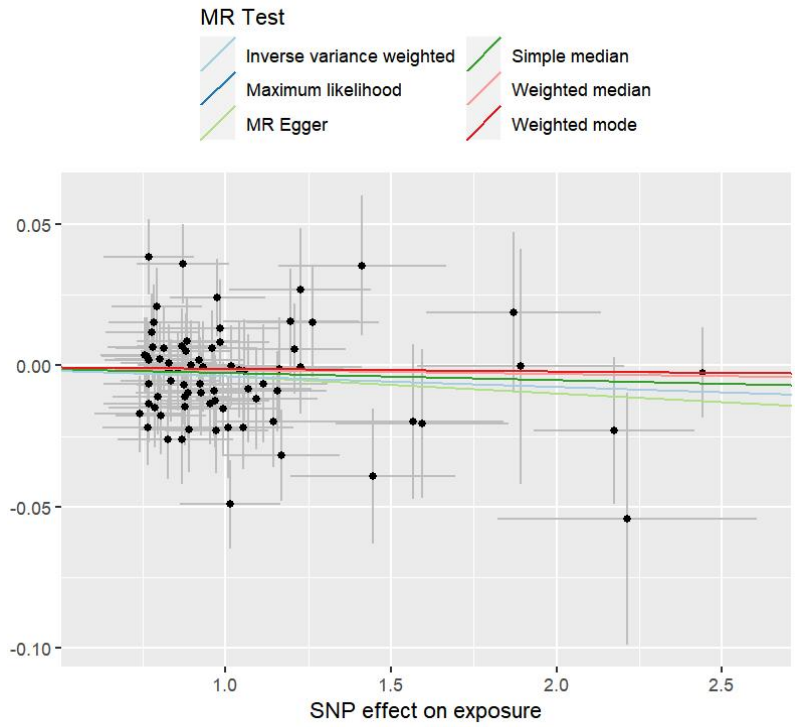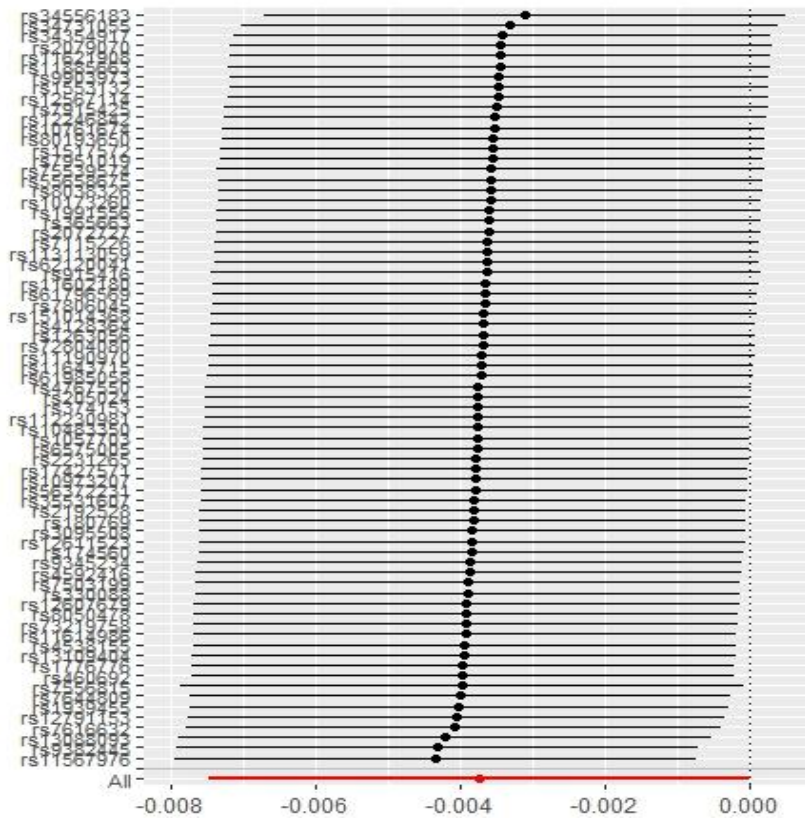

Supplementary Figure 10

Scatter plot and leave-one-out plot of short sleep and P4 associations with overlay of causal estimate in two-sample MR analysis

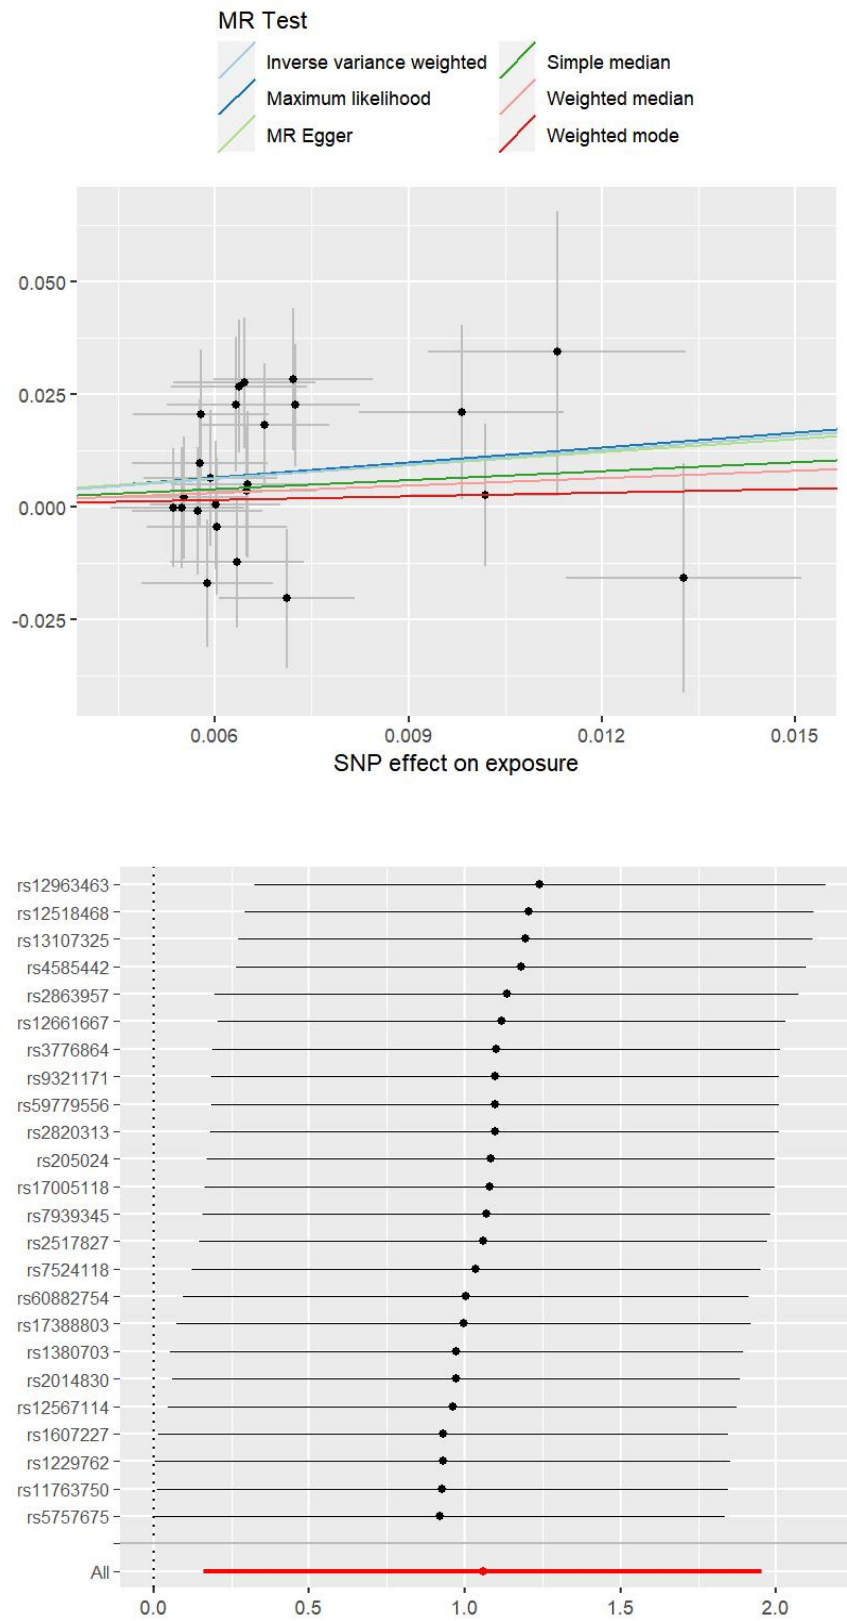

### Supplementary Figure 11

Scatter plot and leave-one-out plot of chronotype and DHEA-sulphate associations with overlay of causal estimate in two-sample MR analysis

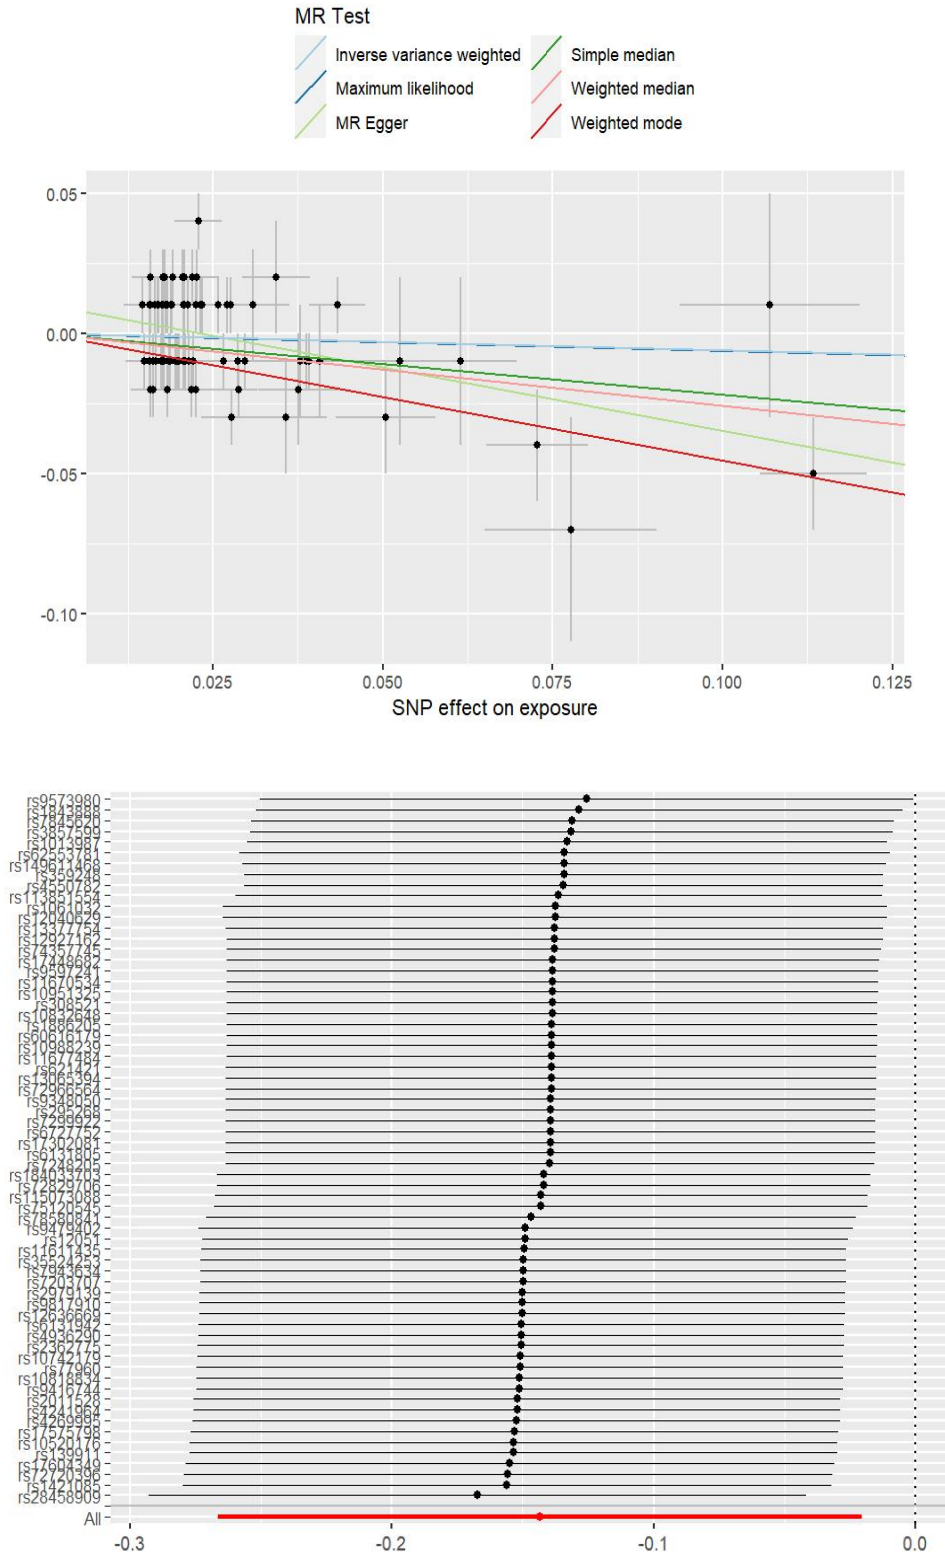

### Supplementary Figure 12

Scatter plot and leave-one-out plot of chronotype and TT associations with overlay of causal estimate in two-sample MR analysis

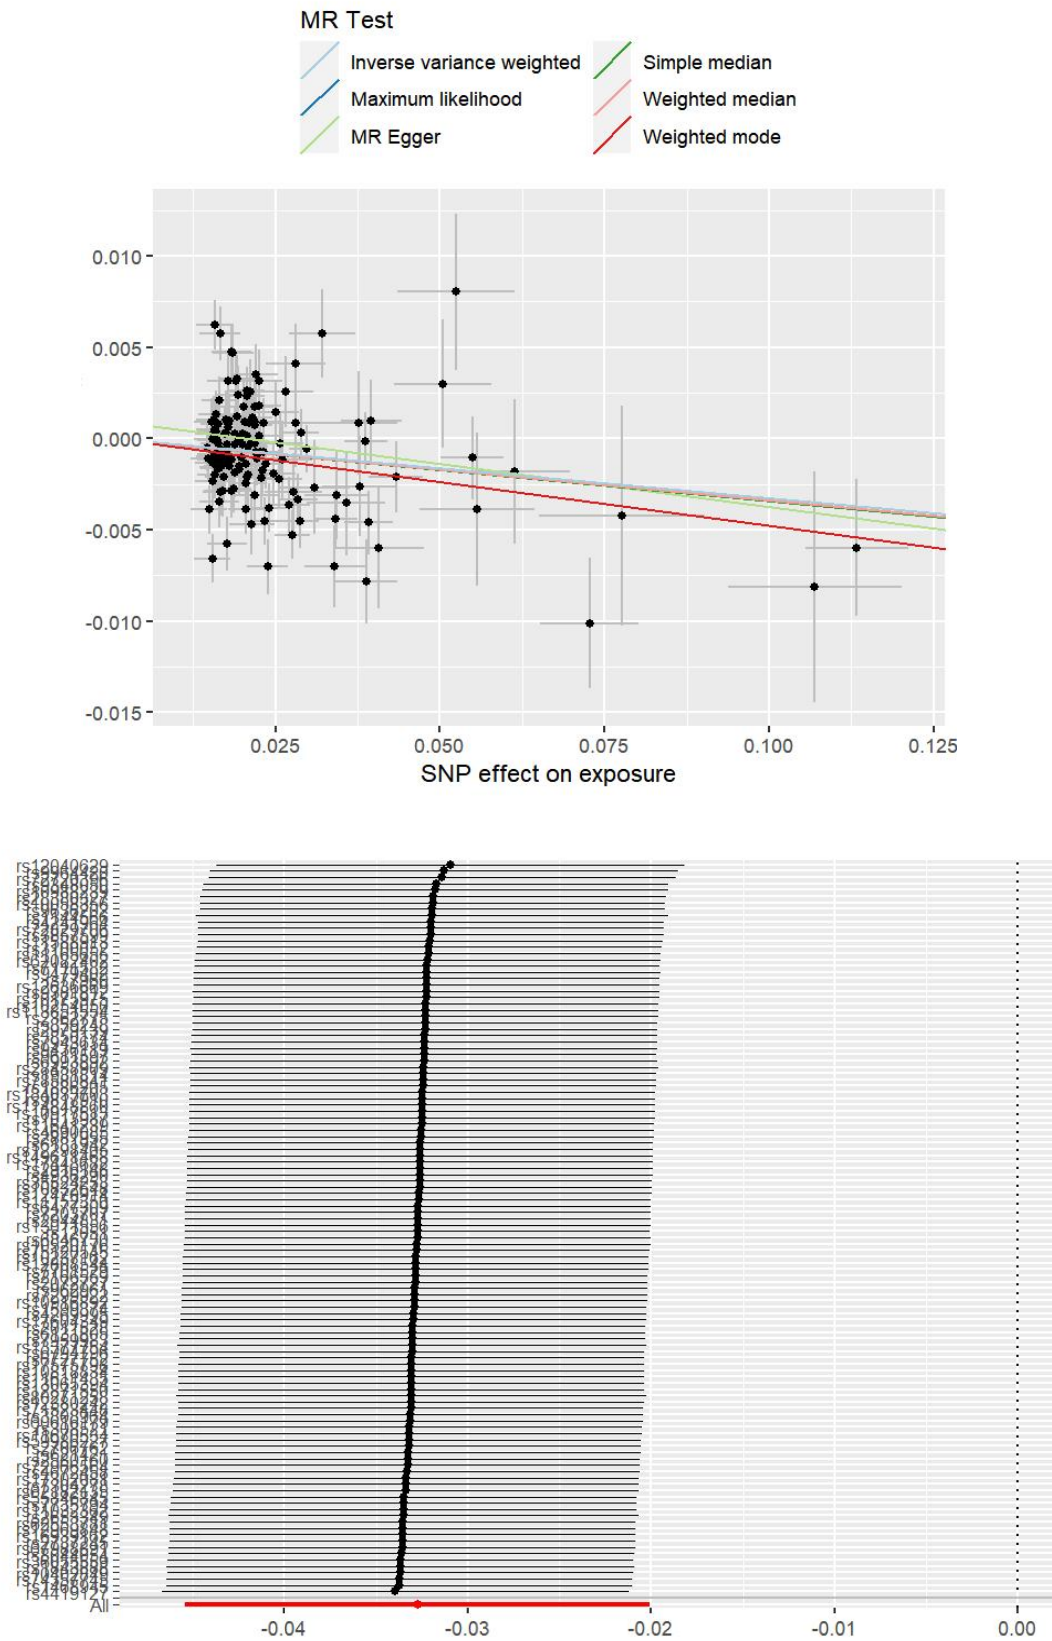

Supplementary Figure 13

Scatter plot and leave-one-out plot of chronotype and BT associations with overlay of causal estimate in two-sample MR analysis

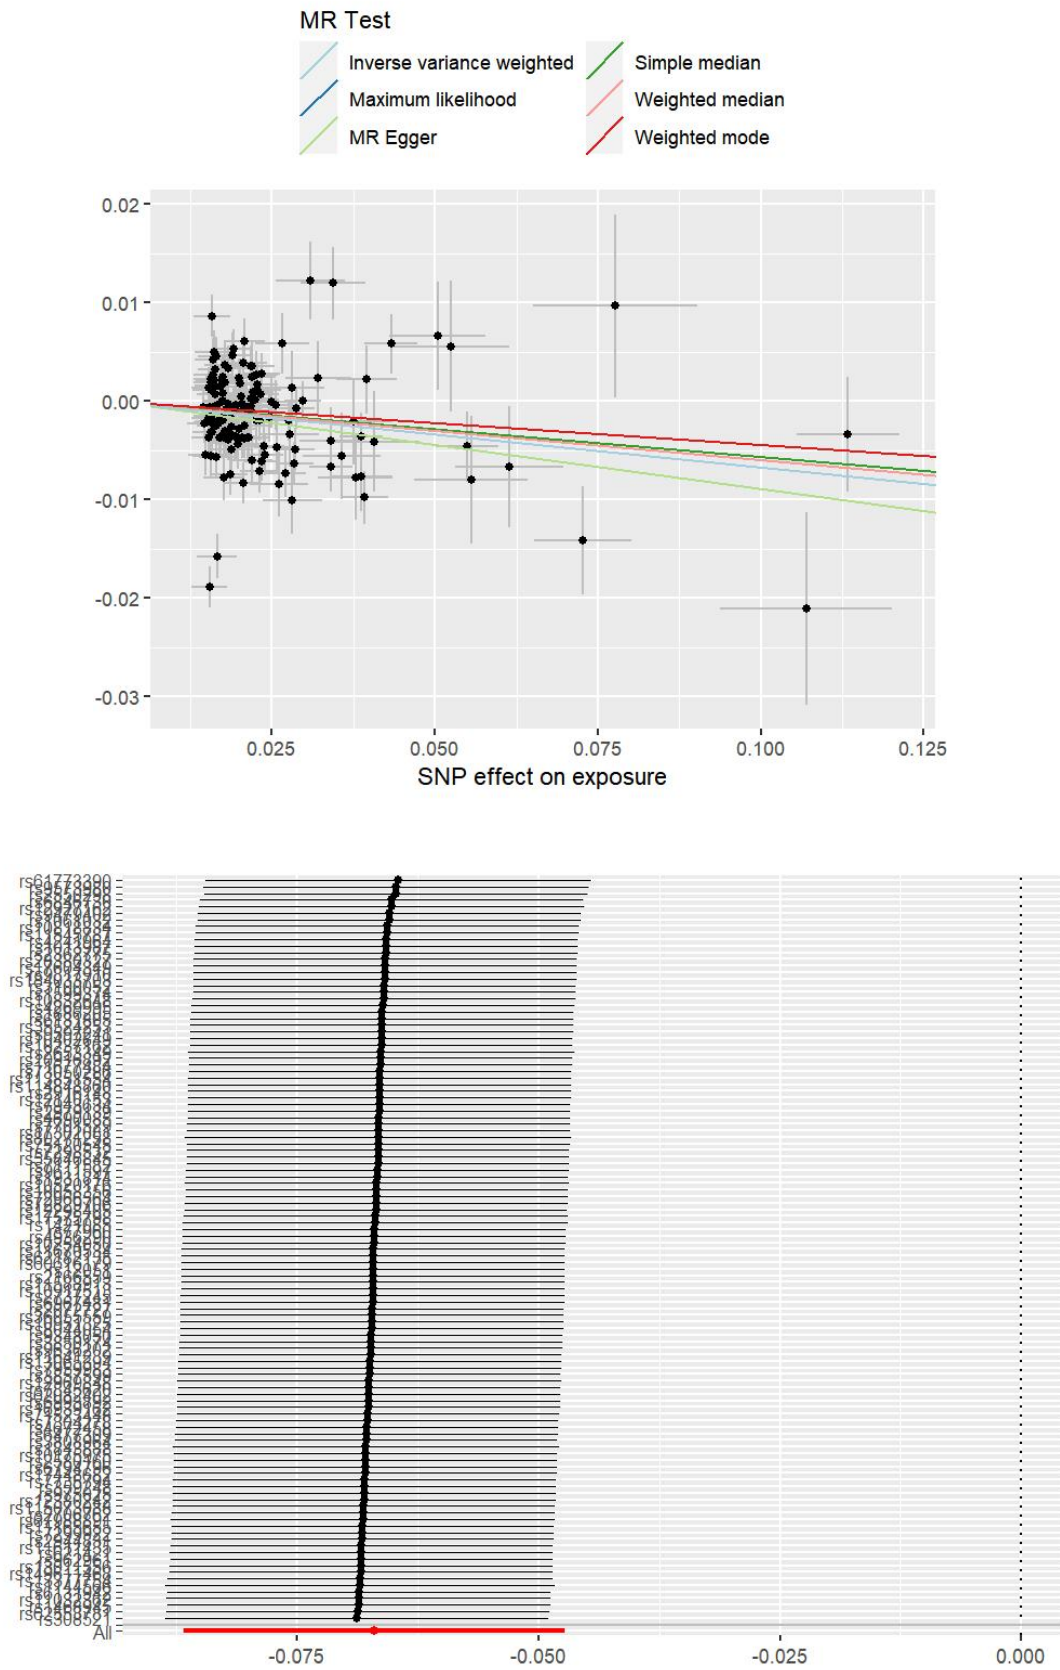

Supplementary table 1. Details about the selected instrumental variables in MR analysis of the association between sleep traits and hypothalamic-pituitary-target gland axis function.

| exposure (Sleep Traits)                   | SNP         | Effect allele | Other allele | exp-Eaf  | F-statistic | exp-Beta    | exp-SE     | exp-Pvalue | Sample size |
|-------------------------------------------|-------------|---------------|--------------|----------|-------------|-------------|------------|------------|-------------|
| insomnia (Jacqueline M. Lane et al, 2019) | rs4751      | G             | T            | 0.575309 | 30.6128491  | -0.00772701 | 0.00139656 | 1.60E-08   | 237627      |
|                                           | rs12405761  | A             | C            | 0.570539 | 43.64462874 | 0.00923926  | 0.00139853 | 2.60E-11   | 237627      |
|                                           | rs11804386  | G             | A            | 0.666568 | 30.28287603 | -0.00805764 | 0.00146423 | 2.60E-08   | 237627      |
|                                           | rs11184946  | C             | T            | 0.582984 | 39.40735428 | -0.00878653 | 0.00139968 | 2.90E-10   | 237627      |
|                                           | rs6664467   | G             | A            | 0.86353  | 31.23964436 | 0.0112654   | 0.00201555 | 4.50E-08   | 237627      |
|                                           | rs2644128   | C             | G            | 0.449554 | 49.28141633 | -0.0097367  | 0.00138698 | 1.00E-12   | 237627      |
|                                           | rs7572387   | A             | C            | 0.570618 | 49.21776074 | -0.00983894 | 0.00140245 | 1.50E-12   | 237627      |
|                                           | rs113851554 | G             | T            | 0.942793 | 181.1584169 | -0.0413744  | 0.00307399 | 1.30E-41   | 237627      |
|                                           | rs62158170  | A             | G            | 0.785192 | 51.28255818 | 0.0120517   | 0.00168292 | 5.70E-13   | 237627      |
|                                           | rs4577309   | A             | G            | 0.46879  | 34.19093895 | 0.00811816  | 0.00138836 | 3.70E-09   | 237627      |
|                                           | rs4688760   | C             | T            | 0.309505 | 51.56463219 | -0.0107674  | 0.00149946 | 1.00E-12   | 237627      |
|                                           | rs9845387   | C             | A            | 0.959258 | 31.50627953 | 0.0196529   | 0.00350129 | 2.10E-08   | 237627      |
|                                           | rs1841625   | A             | G            | 0.568289 | 30.40863588 | -0.00771112 | 0.00139836 | 3.60E-08   | 237627      |
|                                           | rs11097861  | A             | G            | 0.284352 | 35.64078795 | -0.00916107 | 0.00153452 | 1.70E-09   | 237627      |
|                                           | rs1430205   | C             | T            | 0.541669 | 30.59640203 | -0.00769252 | 0.0013907  | 3.60E-08   | 237627      |
|                                           | rs1592757   | G             | C            | 0.644161 | 39.19375105 | -0.00903752 | 0.00144358 | 4.60E-10   | 237627      |
|                                           | rs7711696   | G             | T            | 0.695476 | 45.97554815 | -0.0101773  | 0.00150096 | 9.90E-12   | 237627      |
|                                           | rs10947690  | A             | G            | 0.738436 | 30.46426892 | -0.00868595 | 0.0015737  | 3.50E-08   | 237627      |
|                                           | rs314280    | A             | G            | 0.453284 | 38.6655947  | -0.00863865 | 0.00138926 | 3.50E-10   | 237627      |
|                                           | rs3824081   | T             | C            | 0.475638 | 33.27517535 | 0.00801355  | 0.0013892  | 1.10E-08   | 237627      |
|                                           | rs6593005   | A             | G            | 0.258967 | 32.6798749  | -0.00903102 | 0.00157978 | 8.60E-09   | 237627      |
|                                           | rs10280045  | C             | G            | 0.427157 | 41.46565019 | -0.00906781 | 0.00140818 | 1.00E-10   | 237627      |

|             |   |   |          |             |             |            |          |        |
|-------------|---|---|----------|-------------|-------------|------------|----------|--------|
| rs17151854  | G | T | 0.846784 | 30.99402742 | -0.010705   | 0.00192286 | 2.40E-08 | 237627 |
| rs10156602  | A | G | 0.637771 | 48.75736338 | 0.0101122   | 0.00144819 | 3.40E-12 | 237627 |
| rs2296580   | G | T | 0.702012 | 46.62437043 | 0.0103125   | 0.00151028 | 8.70E-12 | 237627 |
| rs2297787   | T | A | 0.920608 | 35.61740874 | 0.0152861   | 0.00256133 | 2.10E-09 | 237627 |
| rs10838708  | G | A | 0.540565 | 36.00831334 | 0.00840241  | 0.00140024 | 2.50E-09 | 237627 |
| rs324017    | A | C | 0.294978 | 40.57705851 | 0.00967624  | 0.00151903 | 1.10E-10 | 237627 |
| rs2956278   | A | G | 0.785194 | 31.95319946 | -0.00952347 | 0.00168476 | 1.30E-08 | 237627 |
| rs68094047  | C | T | 0.749565 | 34.62695311 | -0.00941756 | 0.00160041 | 3.30E-09 | 237627 |
| rs1923770   | T | A | 0.382709 | 48.96470522 | 0.00996266  | 0.00142375 | 2.30E-12 | 237627 |
| rs1327938   | T | C | 0.346215 | 38.65856088 | -0.00911892 | 0.00146663 | 3.80E-10 | 237627 |
| rs11635495  | T | C | 0.485702 | 34.42501207 | -0.00813358 | 0.00138626 | 6.80E-09 | 237627 |
| rs4886860   | G | C | 0.234173 | 47.36362326 | 0.0112372   | 0.00163281 | 6.10E-12 | 237627 |
| rs17139246  | T | C | 0.610884 | 29.59429424 | -0.00777532 | 0.00142927 | 4.10E-08 | 237627 |
| rs2062113   | T | C | 0.429456 | 40.22037252 | 0.00889979  | 0.00140332 | 1.90E-10 | 237627 |
| rs17669584  | A | G | 0.80454  | 29.24091484 | -0.00964647 | 0.00178391 | 3.60E-08 | 237627 |
| rs575346808 | T | A | 0.731596 | 45.30136556 | -0.0105158  | 0.00156238 | 2.50E-11 | 237627 |
| rs9894577   | G | A | 0.682406 | 69.09063597 | -0.0123638  | 0.00148745 | 1.50E-16 | 237627 |
| rs1942262   | G | A | 0.707539 | 53.61430574 | -0.0111508  | 0.00152288 | 1.10E-13 | 237627 |
| rs11673344  | A | G | 0.619812 | 36.94486902 | -0.00868506 | 0.00142888 | 9.00E-10 | 237627 |

Chronotype (Samuel E. Jones et al, 2019)

|            |   |   |        |             |            |            |          |        |
|------------|---|---|--------|-------------|------------|------------|----------|--------|
| rs1144566  | T | C | 0.029  | 209.319091  | 0.113367   | 0.00783578 | 5.80E-47 | 248094 |
| rs2653349  | A | G | 0.2073 | 139.8607734 | 0.0387249  | 0.00327448 | 5.20E-32 | 248094 |
| rs80271258 | T | C | 0.0844 | 132.7983379 | -0.0549164 | 0.00476547 | 2.60E-30 | 248094 |
| rs12040629 | A | G | 0.16   | 115.2002667 | 0.0391561  | 0.00364815 | 6.70E-27 | 248094 |
| rs13377754 | T | C | 0.6104 | 116.0939941 | 0.0297291  | 0.00275916 | 6.90E-27 | 248094 |
| rs28458909 | T | C | 0.1225 | 112.6664773 | -0.0432803 | 0.00407749 | 2.60E-26 | 248094 |

|            |   |   |        |             |            |            |          |        |
|------------|---|---|--------|-------------|------------|------------|----------|--------|
| rs1843888  | A | G | 0.5433 | 113.5615682 | 0.0288388  | 0.00270621 | 3.20E-26 | 248094 |
| rs4729854  | A | T | 0.4701 | 109.0303592 | -0.0287186 | 0.00275036 | 3.30E-25 | 248094 |
| rs61773390 | T | G | 0.1931 | 101.9283135 | 0.0340792  | 0.00337553 | 1.20E-23 | 248094 |
| rs1421085  | T | C | 0.5935 | 101.1313402 | -0.0275621 | 0.00274075 | 1.50E-23 | 248094 |
| rs9573980  | A | G | 0.9659 | 95.16819053 | 0.0727085  | 0.00745314 | 5.70E-22 | 248094 |
| rs12927162 | A | G | 0.7276 | 91.16050377 | 0.0286498  | 0.00300067 | 6.80E-22 | 248094 |
| rs9964420  | A | C | 0.2983 | 94.06839085 | -0.0284801 | 0.00293643 | 8.60E-22 | 248094 |
| rs2550298  | T | C | 0.3811 | 74.70071378 | -0.0239989 | 0.0027767  | 3.60E-18 | 248094 |
| rs9436119  | A | G | 0.3842 | 73.58417467 | 0.0234899  | 0.00273835 | 4.00E-18 | 248094 |
| rs72720396 | A | G | 0.7741 | 72.52680997 | -0.0271261 | 0.00318521 | 8.40E-18 | 248094 |
| rs10520176 | T | C | 0.4926 | 74.09851823 | 0.0231498  | 0.00268932 | 1.40E-17 | 248094 |
| rs139911   | T | C | 0.5722 | 73.29193727 | -0.0233915 | 0.00273231 | 2.30E-17 | 248094 |
| rs11032362 | A | G | 0.0937 | 71.55935722 | 0.0395538  | 0.00467579 | 4.80E-17 | 248094 |
| rs1061032  | T | G | 0.094  | 65.94647975 | 0.0387677  | 0.00477391 | 2.00E-16 | 248094 |
| rs9479402  | T | C | 0.9883 | 65.69847247 | -0.106941  | 0.0131937  | 3.20E-16 | 248094 |
| rs12969848 | T | C | 0.5313 | 65.42325541 | 0.0218632  | 0.00270301 | 1.30E-15 | 248094 |
| rs67988891 | C | G | 0.6821 | 64.69394785 | -0.0232401 | 0.00288939 | 3.70E-15 | 248094 |
| rs9381812  | A | G | 0.7051 | 61.22431093 | -0.023054  | 0.00294635 | 4.60E-15 | 248094 |
| rs6967481  | T | C | 0.5011 | 58.48870799 | 0.0206433  | 0.00269925 | 6.90E-15 | 248094 |
| rs4241964  | T | G | 0.5217 | 58.78104728 | -0.020735  | 0.00270449 | 1.10E-14 | 248094 |
| rs4419127  | A | G | 0.6622 | 58.29491643 | 0.0218058  | 0.00285599 | 1.30E-14 | 248094 |
| rs62082402 | T | G | 0.1936 | 55.98839802 | 0.0256161  | 0.00342345 | 1.60E-14 | 248094 |
| rs11545787 | A | G | 0.2482 | 57.58225379 | -0.0238098 | 0.0031377  | 4.90E-14 | 248094 |
| rs10951325 | T | C | 0.6319 | 54.01938944 | 0.0205969  | 0.00280238 | 7.90E-14 | 248094 |
| rs6993892  | T | C | 0.6162 | 55.39110675 | -0.0205162 | 0.00275662 | 8.40E-14 | 248094 |
| rs75120545 | T | C | 0.0319 | 54.89630186 | 0.0613917  | 0.00828587 | 1.10E-13 | 248094 |



|            |   |   |        |             |            |            |          |        |
|------------|---|---|--------|-------------|------------|------------|----------|--------|
| rs12140153 | T | G | 0.0892 | 52.63268001 | -0.0340109 | 0.00468803 | 1.60E-13 | 248094 |
| rs17604349 | A | G | 0.1848 | 53.6514576  | -0.0257422 | 0.00351443 | 1.70E-13 | 248094 |
| rs28380327 | A | T | 0.6317 | 54.54728157 | 0.0205097  | 0.00277698 | 2.90E-13 | 248094 |
| rs308521   | T | C | 0.6039 | 52.58009824 | 0.0199718  | 0.00275427 | 3.70E-13 | 248094 |
| rs2737245  | T | G | 0.2748 | 51.34683312 | 0.0215069  | 0.00300138 | 4.50E-13 | 248094 |
| rs10916892 | T | C | 0.6203 | 51.69328891 | -0.0199965 | 0.00278123 | 6.10E-13 | 248094 |
| rs812925   | C | G | 0.6458 | 53.63749834 | -0.0205641 | 0.00280786 | 6.90E-13 | 248094 |
| rs7959983  | T | C | 0.5955 | 51.21214192 | -0.0195258 | 0.00272849 | 9.50E-13 | 248094 |
| rs13011556 | C | G | 0.7624 | 51.77168431 | -0.0227424 | 0.00316075 | 1.10E-12 | 248094 |
| rs10254050 | C | G | 0.1905 | 51.16654306 | -0.0246317 | 0.00344351 | 1.20E-12 | 248094 |
| rs1064213  | A | G | 0.4826 | 50.78211239 | 0.019141   | 0.00268602 | 1.30E-12 | 248094 |
| rs8044054  | T | C | 0.3878 | 48.58144047 | 0.019218   | 0.00275723 | 1.50E-12 | 248094 |
| rs17448682 | T | C | 0.2339 | 48.45388636 | 0.0221528  | 0.00318247 | 2.20E-12 | 248094 |
| rs16939162 | A | G | 0.8304 | 48.62481542 | 0.0249887  | 0.00358356 | 2.20E-12 | 248094 |
| rs1468945  | A | G | 0.7852 | 47.7090256  | -0.0225859 | 0.00326992 | 4.20E-12 | 248094 |
| rs6846730  | T | C | 0.2353 | 47.90045275 | -0.0220017 | 0.00317897 | 5.60E-12 | 248094 |
| rs12636669 | T | C | 0.0801 | 47.65819162 | 0.0343448  | 0.00497499 | 5.80E-12 | 248094 |
| rs4269995  | T | C | 0.251  | 47.36825699 | -0.021271  | 0.00309061 | 5.90E-12 | 248094 |
| rs62553781 | T | C | 0.0329 | 47.0651998  | -0.0504004 | 0.00734656 | 1.20E-11 | 248094 |
| rs1013987  | T | C | 0.4033 | 44.29332993 | -0.0182666 | 0.00274466 | 1.50E-11 | 248094 |
| rs10988239 | T | C | 0.5117 | 46.48279542 | -0.0186334 | 0.00273304 | 1.60E-11 | 248094 |
| rs7304278  | A | G | 0.2827 | 44.90468399 | -0.020255  | 0.00302264 | 2.20E-11 | 248094 |
| rs2362775  | T | C | 0.5342 | 44.47372907 | -0.0180186 | 0.0027019  | 2.80E-11 | 248094 |
| rs12808544 | A | C | 0.2409 | 43.47086971 | -0.0207525 | 0.00314754 | 3.00E-11 | 248094 |
| rs17575798 | A | G | 0.1918 | 44.17050892 | -0.0225553 | 0.00339377 | 4.20E-11 | 248094 |
| rs77960    | A | G | 0.3304 | 42.91353843 | 0.0187567  | 0.00286325 | 4.20E-11 | 248094 |

|             |   |   |        |             |            |            |          |        |
|-------------|---|---|--------|-------------|------------|------------|----------|--------|
| rs72796401  | A | T | 0.1903 | 40.98085535 | 0.0219581  | 0.00343008 | 5.90E-11 | 248094 |
| rs247929    | C | G | 0.5081 | 43.32987761 | 0.0177077  | 0.0026901  | 6.20E-11 | 248094 |
| rs621421    | T | C | 0.6256 | 40.81312077 | -0.0177395 | 0.00277678 | 7.50E-11 | 248094 |
| rs184033703 | A | G | 0.0585 | 43.02739733 | 0.0377937  | 0.00576165 | 8.10E-11 | 248094 |
| rs74357745  | A | G | 0.8803 | 41.48345568 | 0.026546   | 0.00412156 | 8.70E-11 | 248094 |
| rs6131942   | A | G | 0.418  | 41.22586014 | -0.0175437 | 0.00273235 | 9.40E-11 | 248094 |
| rs60616179  | A | G | 0.9443 | 39.93776473 | 0.0375809  | 0.00594669 | 1.10E-10 | 248094 |
| rs975025    | T | C | 0.0758 | 40.81901015 | -0.0321062 | 0.00502525 | 1.30E-10 | 248094 |
| rs10175975  | T | C | 0.1853 | 42.26724255 | 0.0228441  | 0.00351376 | 1.80E-10 | 248094 |
| rs9817910   | A | G | 0.5576 | 39.5682181  | -0.0170371 | 0.00270846 | 3.10E-10 | 248094 |
| rs114848860 | A | T | 0.9737 | 40.57444084 | -0.0555837 | 0.00872612 | 3.60E-10 | 248094 |
| rs62182135  | A | C | 0.3285 | 39.69803039 | -0.0179439 | 0.00284795 | 3.70E-10 | 248094 |
| rs4936290   | A | C | 0.6584 | 39.21206713 | -0.0177058 | 0.00282752 | 4.60E-10 | 248094 |
| rs1886205   | A | C | 0.7604 | 37.80228442 | 0.0194352  | 0.00316104 | 4.90E-10 | 248094 |
| rs7845620   | A | C | 0.8344 | 38.34107297 | -0.0224873 | 0.00363166 | 5.20E-10 | 248094 |
| rs7111582   | A | G | 0.8956 | 39.31982112 | -0.0277534 | 0.00442599 | 5.20E-10 | 248094 |
| rs10917513  | T | C | 0.6476 | 40.18285981 | -0.0179024 | 0.00282417 | 6.70E-10 | 248094 |
| rs3850174   | A | T | 0.2575 | 39.36951297 | -0.0194471 | 0.00309938 | 6.80E-10 | 248094 |
| rs3100052   | A | G | 0.3886 | 38.27803461 | 0.0170795  | 0.00276058 | 6.90E-10 | 248094 |
| rs2979139   | A | G | 0.5048 | 38.91463739 | -0.0168003 | 0.00269315 | 7.40E-10 | 248094 |
| rs9348050   | T | C | 0.4864 | 38.24218551 | 0.016638   | 0.00269048 | 7.50E-10 | 248094 |
| rs9597241   | A | C | 0.8106 | 38.29891832 | 0.0213884  | 0.00345609 | 7.50E-10 | 248094 |
| rs9636202   | A | G | 0.2662 | 36.16262671 | -0.0183734 | 0.00305534 | 7.50E-10 | 248094 |
| rs7203707   | A | C | 0.5193 | 37.24850801 | -0.0164726 | 0.00269903 | 7.60E-10 | 248094 |
| rs6477309   | T | C | 0.6661 | 37.11231964 | 0.0174399  | 0.00286276 | 8.00E-10 | 248094 |
| rs149611468 | T | C | 0.9888 | 37.97677434 | 0.0776374  | 0.0125983  | 8.50E-10 | 248094 |

|             |   |   |        |             |            |            |          |        |
|-------------|---|---|--------|-------------|------------|------------|----------|--------|
| rs2072727   | T | C | 0.4327 | 36.2708139  | 0.016352   | 0.00271514 | 8.50E-10 | 248094 |
| rs7429614   | T | G | 0.416  | 36.36037864 | 0.0164171  | 0.00272259 | 9.20E-10 | 248094 |
| rs80097534  | T | G | 0.0966 | 38.07174464 | -0.0281025 | 0.00455453 | 9.30E-10 | 248094 |
| rs113851554 | T | G | 0.0567 | 35.59155971 | -0.0357353 | 0.00598996 | 1.00E-09 | 248094 |
| rs4672458   | T | C | 0.4764 | 36.69508529 | -0.0162709 | 0.00268601 | 1.10E-09 | 248094 |
| rs10818834  | T | C | 0.7297 | 38.28793384 | 0.0188673  | 0.00304915 | 1.10E-09 | 248094 |
| rs9416744   | A | C | 0.2595 | 37.97311829 | 0.0189843  | 0.00308075 | 1.30E-09 | 248094 |
| rs11152350  | A | C | 0.467  | 36.59316914 | -0.0163037 | 0.00269517 | 1.30E-09 | 248094 |
| rs3857599   | A | C | 0.1659 | 36.06123065 | 0.0218522  | 0.00363894 | 1.40E-09 | 248094 |
| rs359248    | T | G | 0.4564 | 35.52641241 | -0.0161518 | 0.00270985 | 1.50E-09 | 248094 |
| rs10742179  | A | G | 0.2627 | 35.64378118 | 0.0182967  | 0.00306465 | 1.50E-09 | 248094 |
| rs12380242  | T | C | 0.5058 | 34.57425992 | -0.015796  | 0.0026864  | 1.60E-09 | 248094 |
| rs11677484  | T | G | 0.2574 | 36.0040356  | 0.0185564  | 0.00309256 | 1.70E-09 | 248094 |
| rs12470914  | A | T | 0.1005 | 34.61531234 | 0.0261187  | 0.00443933 | 2.20E-09 | 248094 |
| rs55846845  | A | G | 0.5177 | 35.29808397 | -0.016     | 0.00269305 | 2.40E-09 | 248094 |
| rs7299922   | A | G | 0.6388 | 33.27736587 | 0.016149   | 0.00279944 | 2.50E-09 | 248094 |
| rs13065394  | T | G | 0.286  | 34.87437948 | -0.017504  | 0.00296404 | 3.00E-09 | 248094 |
| rs115073088 | A | G | 0.975  | 34.52638409 | -0.0524798 | 0.00893134 | 3.10E-09 | 248094 |
| rs10832648  | A | C | 0.1989 | 34.27836974 | -0.019805  | 0.00338271 | 3.20E-09 | 248094 |
| rs10237162  | T | C | 0.7232 | 34.17783116 | 0.0176177  | 0.00301354 | 3.50E-09 | 248094 |
| rs2916148   | A | G | 0.4522 | 35.16964555 | 0.0162149  | 0.0027342  | 3.50E-09 | 248094 |
| rs7701529   | A | T | 0.2393 | 35.28482903 | -0.0188448 | 0.00317247 | 3.60E-09 | 248094 |
| rs78580841  | T | C | 0.0694 | 33.37351067 | 0.0309392  | 0.0053556  | 3.70E-09 | 248094 |
| rs2706762   | T | C | 0.1496 | 34.09493355 | -0.0219218 | 0.00375432 | 4.00E-09 | 248094 |
| rs11165655  | A | G | 0.5281 | 34.17221598 | -0.0157164 | 0.00268854 | 4.10E-09 | 248094 |
| rs7735794   | A | G | 0.2241 | 34.9111227  | 0.0201147  | 0.00340433 | 4.70E-09 | 248094 |

|            |   |   |        |             |            |            |          |        |
|------------|---|---|--------|-------------|------------|------------|----------|--------|
| rs72829706 | A | G | 0.96   | 34.45181792 | 0.0407112  | 0.00693598 | 5.10E-09 | 248094 |
| rs6794796  | A | G | 0.2897 | 33.71245487 | 0.0172176  | 0.00296536 | 5.30E-09 | 248094 |
| rs2011528  | T | C | 0.8254 | 33.19874565 | -0.0206881 | 0.00359054 | 5.30E-09 | 248094 |
| rs35524253 | A | G | 0.3539 | 31.80555911 | 0.015862   | 0.00281259 | 5.80E-09 | 248094 |
| rs10058356 | T | C | 0.6958 | 33.45143293 | -0.0169817 | 0.00293612 | 6.80E-09 | 248094 |
| rs17302081 | T | C | 0.4414 | 33.51138154 | 0.0156573  | 0.00270471 | 6.90E-09 | 248094 |
| rs848552   | C | G | 0.4755 | 32.54476516 | -0.0153219 | 0.00268579 | 7.00E-09 | 248094 |
| rs9347926  | A | T | 0.4407 | 33.86820548 | 0.0157068  | 0.00269893 | 7.30E-09 | 248094 |
| rs59986227 | C | G | 0.7493 | 33.07222254 | -0.0178401 | 0.00310217 | 8.30E-09 | 248094 |
| rs11670534 | T | C | 0.1614 | 33.42606852 | -0.0209755 | 0.00362802 | 8.50E-09 | 248094 |
| rs11611435 | T | C | 0.5561 | 33.91123136 | 0.0157403  | 0.00270297 | 8.60E-09 | 248094 |
| rs72841368 | A | T | 0.8104 | 32.93036593 | -0.0197592 | 0.00344327 | 8.70E-09 | 248094 |
| rs10402849 | T | C | 0.2002 | 32.87109746 | 0.0192609  | 0.00335946 | 8.90E-09 | 248094 |
| rs2166559  | T | C | 0.8611 | 31.81495278 | -0.0218336 | 0.00387088 | 9.10E-09 | 248094 |
| rs2944831  | A | G | 0.2946 | 34.13691703 | 0.0172414  | 0.00295094 | 1.10E-08 | 248094 |
| rs11641239 | T | C | 0.2854 | 33.78449764 | 0.0172486  | 0.00296753 | 1.10E-08 | 248094 |
| rs9394154  | C | G | 0.436  | 32.59806655 | -0.0155027 | 0.00271526 | 1.30E-08 | 248094 |
| rs6727752  | A | G | 0.3569 | 31.99578366 | 0.0156947  | 0.00277464 | 1.40E-08 | 248094 |
| rs7943634  | T | C | 0.3075 | 31.97428494 | -0.016455  | 0.00291003 | 1.40E-08 | 248094 |
| rs11588913 | A | G | 0.4037 | 31.83852821 | -0.0154525 | 0.00273856 | 1.50E-08 | 248094 |
| rs1599374  | A | G | 0.5163 | 32.36988993 | 0.0153807  | 0.00270337 | 1.50E-08 | 248094 |
| rs36055559 | A | G | 0.166  | 32.11087766 | -0.0210912 | 0.00372199 | 1.50E-08 | 248094 |
| rs6131805  | T | G | 0.4022 | 31.19434085 | 0.0156349  | 0.00279935 | 1.50E-08 | 248094 |
| rs1931814  | A | G | 0.4787 | 32.72806731 | 0.0153877  | 0.00268976 | 1.60E-08 | 248094 |
| rs1800828  | C | G | 0.7508 | 32.64231756 | 0.0176235  | 0.00308462 | 1.70E-08 | 248094 |
| rs2580160  | A | G | 0.5554 | 31.53540156 | 0.0153499  | 0.00273342 | 1.70E-08 | 248094 |

|            |   |   |        |             |            |            |          |        |
|------------|---|---|--------|-------------|------------|------------|----------|--------|
| rs9611597  | A | T | 0.8371 | 31.91375691 | 0.0208731  | 0.00369486 | 1.80E-08 | 248094 |
| rs71523448 | C | G | 0.0788 | 30.7339727  | -0.0280253 | 0.00505523 | 2.00E-08 | 248094 |
| rs962961   | T | C | 0.3308 | 30.74643585 | -0.0159069 | 0.00286872 | 2.00E-08 | 248094 |
| rs4550782  | T | G | 0.6655 | 30.69168704 | 0.015797   | 0.00285144 | 2.20E-08 | 248094 |
| rs486416   | A | G | 0.6527 | 30.83292493 | -0.0154284 | 0.00277852 | 2.30E-08 | 248094 |
| rs72966564 | T | C | 0.2507 | 31.09674811 | -0.0174371 | 0.00312692 | 2.50E-08 | 248094 |
| rs73050286 | T | C | 0.7817 | 29.81421751 | 0.0178095  | 0.00326167 | 2.60E-08 | 248094 |
| rs12871550 | A | G | 0.3229 | 30.95503754 | 0.0159966  | 0.00287516 | 2.60E-08 | 248094 |
| rs3808964  | T | G | 0.6326 | 31.56841764 | 0.0157096  | 0.00279601 | 2.70E-08 | 248094 |
| rs12298405 | T | C | 0.3301 | 30.63198648 | -0.0158538 | 0.00286448 | 2.70E-08 | 248094 |
| rs7298532  | T | C | 0.7213 | 30.34185861 | 0.0164304  | 0.00298282 | 2.70E-08 | 248094 |
| rs12206814 | C | G | 0.4869 | 30.8400311  | 0.015175   | 0.00273257 | 2.80E-08 | 248094 |
| rs7248205  | T | C | 0.6003 | 29.25973908 | 0.0148995  | 0.00275446 | 3.80E-08 | 248094 |
| rs4690085  | A | G | 0.5348 | 30.00686647 | -0.0147386 | 0.00269058 | 3.90E-08 | 248094 |
| rs295268   | T | C | 0.7403 | 29.01846073 | -0.0165883 | 0.00307939 | 4.10E-08 | 248094 |
| rs2881955  | T | C | 0.2788 | 28.83440562 | 0.0161216  | 0.00300229 | 4.30E-08 | 248094 |
| rs12051    | A | G | 0.6119 | 27.81060414 | -0.014573  | 0.0027634  | 5.00E-08 | 248094 |

Sleep Duration (Hassan S. Dashti et al, 2019)

|            |   |   |       |             |       |           |          |        |
|------------|---|---|-------|-------------|-------|-----------|----------|--------|
| rs7556815  | A | G | 0.219 | 220.7854247 | 2.443 | 0.1644138 | 1.30E-49 | 446118 |
| rs75539574 | C | A | 0.086 | 79.51478971 | 2.175 | 0.2439132 | 6.90E-19 | 446118 |
| rs12607679 | T | C | 0.738 | 60.29481012 | 1.208 | 0.1555704 | 8.30E-15 | 446118 |
| rs915416   | C | G | 0.29  | 59.65394739 | 1.156 | 0.1496712 | 9.90E-15 | 446118 |
| rs9940646  | C | G | 0.578 | 54.74807428 | 1.017 | 0.1374474 | 1.20E-13 | 446118 |
| rs13109404 | T | G | 0.928 | 50.09205794 | 1.872 | 0.2644974 | 1.40E-12 | 446118 |
| rs8050478  | G | A | 0.5   | 49.91092209 | 0.96  | 0.1358856 | 1.70E-12 | 446118 |
| rs56372231 | T | C | 0.334 | 49.88680468 | 1.017 | 0.1439886 | 2.20E-12 | 446118 |

|             |   |   |       |             |       |           |          |        |
|-------------|---|---|-------|-------------|-------|-----------|----------|--------|
| rs13088093  | G | T | 0.336 | 45.84844112 | 0.976 | 0.144141  | 7.00E-12 | 446118 |
| rs2079070   | C | G | 0.265 | 46.76407166 | 1.053 | 0.1539828 | 7.50E-12 | 446118 |
| rs34556183  | A | G | 0.72  | 44.94857259 | 1.015 | 0.1513938 | 2.30E-11 | 446118 |
| rs3095508   | C | A | 0.594 | 44.37234023 | 0.921 | 0.1382622 | 3.10E-11 | 446118 |
| rs34731055  | T | C | 0.181 | 43.61069912 | 1.168 | 0.1768668 | 3.70E-11 | 446118 |
| rs73219758  | G | A | 0.708 | 43.19724868 | 0.984 | 0.1497156 | 5.60E-11 | 446118 |
| rs10973207  | T | G | 0.158 | 42.78318097 | 1.226 | 0.1874364 | 6.00E-11 | 446118 |
| rs2139261   | G | C | 0.749 | 41.64313334 | 1.122 | 0.1738686 | 8.50E-11 | 446118 |
| rs4592416   | G | A | 0.464 | 41.83688475 | 0.881 | 0.136206  | 9.30E-11 | 446118 |
| rs365663    | A | G | 0.546 | 41.24409522 | 0.878 | 0.1367142 | 1.00E-10 | 446118 |
| rs1517572   | C | A | 0.581 | 40.76005616 | 0.879 | 0.1376802 | 1.50E-10 | 446118 |
| rs7915425   | T | C | 0.175 | 40.67488033 | 1.144 | 0.1793754 | 2.00E-10 | 446118 |
| rs330088    | C | T | 0.547 | 40.37335254 | 0.868 | 0.1366068 | 2.70E-10 | 446118 |
| rs8038326   | A | G | 0.727 | 39.24618685 | 0.955 | 0.152442  | 2.80E-10 | 446118 |
| rs460692    | C | T | 0.137 | 39.91977319 | 1.263 | 0.1998984 | 3.60E-10 | 446118 |
| rs9382445   | T | C | 0.623 | 38.77726245 | 0.872 | 0.1400322 | 4.80E-10 | 446118 |
| rs4767550   | G | A | 0.414 | 38.3352706  | 0.858 | 0.138576  | 6.30E-10 | 446118 |
| rs11885663  | T | C | 0.248 | 38.36607759 | 0.973 | 0.1570866 | 8.60E-10 | 446118 |
| rs1991556   | G | A | 0.774 | 36.9949257  | 0.994 | 0.1634238 | 1.00E-09 | 446118 |
| rs1057703   | G | T | 0.147 | 36.60253585 | 1.164 | 0.1923966 | 1.10E-09 | 446118 |
| rs4128364   | C | T | 0.339 | 37.2904324  | 0.876 | 0.1434516 | 1.40E-09 | 446118 |
| rs61796569  | T | C | 0.27  | 36.29737931 | 0.927 | 0.1538658 | 1.50E-09 | 446118 |
| rs10483350  | G | A | 0.195 | 36.67716793 | 1.042 | 0.172056  | 1.50E-09 | 446118 |
| rs7115226   | A | C | 0.074 | 37.16222211 | 1.594 | 0.2614794 | 1.70E-09 | 446118 |
| rs269054    | A | T | 0.422 | 35.42867605 | 0.819 | 0.1375962 | 2.10E-09 | 446118 |
| rs112230981 | A | G | 0.95  | 36.38230449 | 1.892 | 0.3136722 | 2.20E-09 | 446118 |

|             |   |   |       |             |       |           |          |        |
|-------------|---|---|-------|-------------|-------|-----------|----------|--------|
| rs11602180  | C | T | 0.837 | 35.43546187 | 1.095 | 0.183948  | 2.30E-09 | 446118 |
| rs2192528   | A | G | 0.48  | 34.69769986 | 0.802 | 0.136152  | 2.70E-09 | 446118 |
| rs12246842  | A | G | 0.46  | 34.7162806  | 0.804 | 0.136455  | 3.90E-09 | 446118 |
| rs205024    | T | C | 0.384 | 35.33620121 | 0.83  | 0.1396266 | 3.90E-09 | 446118 |
| rs12567114  | A | G | 0.276 | 34.09631904 | 0.89  | 0.152418  | 4.30E-09 | 446118 |
| rs7616632   | T | G | 0.522 | 33.83721861 | 0.792 | 0.1361532 | 4.30E-09 | 446118 |
| rs6575005   | T | C | 0.758 | 34.72303542 | 0.934 | 0.1585032 | 4.40E-09 | 446118 |
| rs1776776   | T | C | 0.874 | 34.27058724 | 1.198 | 0.2046426 | 4.90E-09 | 446118 |
| rs11621908  | C | T | 0.917 | 33.51393602 | 1.446 | 0.2497788 | 5.60E-09 | 446118 |
| rs10421649  | A | T | 0.557 | 33.59554825 | 0.798 | 0.1376772 | 6.90E-09 | 446118 |
| rs2072727   | T | C | 0.436 | 33.62300618 | 0.795 | 0.1371036 | 7.90E-09 | 446118 |
| rs113113059 | T | C | 0.78  | 34.73738106 | 0.968 | 0.1642392 | 8.40E-09 | 446118 |
| rs374153    | C | T | 0.158 | 32.23009083 | 1.057 | 0.1861848 | 9.10E-09 | 446118 |
| rs151014368 | A | G | 0.206 | 32.60490276 | 0.966 | 0.1691748 | 9.10E-09 | 446118 |
| rs62120041  | T | C | 0.934 | 32.5880963  | 1.567 | 0.2744982 | 9.60E-09 | 446118 |
| rs7503199   | C | T | 0.734 | 33.09829257 | 0.885 | 0.1538298 | 1.00E-08 | 446118 |
| rs1939455   | G | T | 0.879 | 32.92233186 | 1.226 | 0.2136708 | 1.20E-08 | 446118 |
| rs7951019   | G | T | 0.032 | 31.99277463 | 2.213 | 0.391251  | 1.20E-08 | 446118 |
| rs17732997  | C | G | 0.569 | 31.94721314 | 0.776 | 0.137292  | 1.20E-08 | 446118 |
| rs61985058  | T | C | 0.143 | 33.18246373 | 1.116 | 0.1937358 | 1.30E-08 | 446118 |
| rs17427571  | A | G | 0.684 | 32.26255921 | 0.83  | 0.1461264 | 1.30E-08 | 446118 |
| rs7806045   | T | C | 0.755 | 31.6979645  | 0.887 | 0.1575462 | 1.40E-08 | 446118 |
| rs35531607  | C | T | 0.474 | 31.88336504 | 0.77  | 0.1363668 | 1.50E-08 | 446118 |
| rs7644809   | T | C | 0.422 | 32.23407516 | 0.784 | 0.1380888 | 1.60E-08 | 446118 |
| rs9345234   | C | A | 0.578 | 32.05885976 | 0.781 | 0.1379358 | 1.80E-08 | 446118 |
| rs12791153  | T | A | 0.081 | 31.18855246 | 1.413 | 0.253014  | 1.90E-08 | 446118 |

|            |   |   |       |             |       |           |          |        |
|------------|---|---|-------|-------------|-------|-----------|----------|--------|
| rs1263056  | A | G | 0.519 | 31.59438896 | 0.768 | 0.1366332 | 2.00E-08 | 446118 |
| rs55658675 | C | T | 0.645 | 30.73612722 | 0.788 | 0.1421352 | 2.00E-08 | 446118 |
| rs11567976 | T | C | 0.571 | 31.37521513 | 0.768 | 0.1371096 | 2.10E-08 | 446118 |
| rs180769   | T | C | 0.425 | 30.73408809 | 0.763 | 0.1376304 | 2.30E-08 | 446118 |
| rs1553132  | G | A | 0.258 | 31.47697679 | 0.87  | 0.1550682 | 2.50E-08 | 446118 |
| rs9903973  | C | T | 0.467 | 31.57630605 | 0.766 | 0.1363164 | 2.60E-08 | 446118 |
| rs11614986 | A | G | 0.821 | 30.82216724 | 0.983 | 0.1770606 | 2.70E-08 | 446118 |
| rs2231265  | G | A | 0.772 | 30.67763732 | 0.897 | 0.1619502 | 2.70E-08 | 446118 |
| rs174560   | C | T | 0.314 | 31.0735425  | 0.815 | 0.146205  | 2.80E-08 | 446118 |
| rs10173260 | C | T | 0.606 | 30.77833147 | 0.77  | 0.1387932 | 2.90E-08 | 446118 |
| rs72804080 | G | A | 0.15  | 31.010754   | 1.068 | 0.1917852 | 2.90E-08 | 446118 |
| rs12611523 | A | G | 0.545 | 30.80266986 | 0.758 | 0.1365762 | 3.10E-08 | 446118 |
| rs11643715 | G | C | 0.291 | 30.99835348 | 0.834 | 0.1497948 | 3.20E-08 | 446118 |
| rs4538155  | T | C | 0.647 | 29.91391026 | 0.779 | 0.1424298 | 3.60E-08 | 446118 |
| rs34354917 | C | A | 0.71  | 30.23040752 | 0.825 | 0.1500486 | 3.90E-08 | 446118 |
| rs80193650 | G | A | 0.162 | 30.11948628 | 1.01  | 0.1840338 | 4.10E-08 | 446118 |
| rs10761674 | C | T | 0.477 | 29.62617791 | 0.74  | 0.1359546 | 4.20E-08 | 446118 |
| rs11190970 | G | A | 0.799 | 29.69092745 | 0.923 | 0.1693908 | 4.60E-08 | 446118 |

short sleep duration (Hassan S. Dashti et al, 2019 )

|            |   |   |          |             |             |             |          |        |
|------------|---|---|----------|-------------|-------------|-------------|----------|--------|
| rs7524118  | T | C | 0.291624 | 29.90151811 | -0.0057622  | 0.00105376  | 4.90E-08 | 106192 |
| rs2186122  | A | T | 0.438434 | 34.00626458 | -0.0056704  | 0.000972376 | 4.80E-09 | 106192 |
| rs12567114 | G | A | 0.7246   | 34.49743204 | 0.00632465  | 0.00107682  | 4.10E-09 | 106192 |
| rs2820313  | A | G | 0.658888 | 35.34860096 | -0.00600641 | 0.00101025  | 2.30E-09 | 106192 |
| rs1380703  | A | G | 0.616469 | 45.33728626 | -0.00676427 | 0.0010046   | 1.60E-11 | 106192 |
| rs2863957  | C | A | 0.781508 | 77.04148568 | 0.0101896   | 0.0011609   | 2.60E-18 | 106192 |



|            |   |   |          |             |             |             |          |        |
|------------|---|---|----------|-------------|-------------|-------------|----------|--------|
| rs2014830  | C | T | 0.698128 | 30.34820597 | 0.00578646  | 0.00105038  | 2.70E-08 | 106192 |
| rs17005118 | G | A | 0.735064 | 35.56449384 | -0.00648249 | 0.00108701  | 2.50E-09 | 106192 |
| rs13107325 | C | T | 0.925472 | 52.67161192 | -0.0132682  | 0.0018282   | 2.50E-13 | 106192 |
| rs12518468 | T | C | 0.671544 | 33.22495249 | -0.00588504 | 0.00102098  | 8.50E-09 | 106192 |
| rs3776864  | A | C | 0.66721  | 31.53735877 | 0.00572403  | 0.00101927  | 1.70E-08 | 106192 |
| rs4585442  | A | G | 0.688977 | 37.51348239 | -0.00634685 | 0.00103625  | 8.10E-10 | 106192 |
| rs2517827  | C | A | 0.688933 | 32.73840912 | -0.00592859 | 0.00103615  | 5.70E-09 | 106192 |
| rs12661667 | C | T | 0.736505 | 30.6814928  | -0.00602193 | 0.00108717  | 2.80E-08 | 106192 |
| rs9367621  | T | A | 0.43104  | 31.51602316 | 0.00544503  | 0.000969917 | 1.60E-08 | 106192 |
| rs9321171  | C | T | 0.540122 | 30.71760077 | 0.00535425  | 0.000966062 | 4.20E-08 | 106192 |
| rs11763750 | G | A | 0.814346 | 34.17821469 | 0.00721224  | 0.00123366  | 5.10E-09 | 106192 |
| rs1229762  | C | T | 0.335499 | 50.71433258 | -0.00723933 | 0.00101656  | 1.00E-12 | 106192 |
| rs60882754 | A | T | 0.938985 | 31.89883392 | 0.011304    | 0.00200145  | 1.80E-08 | 106192 |
| rs1607227  | G | T | 0.704938 | 36.46775659 | 0.0063693   | 0.00105472  | 1.50E-09 | 106192 |
| rs7939345  | T | G | 0.207569 | 30.23566763 | 0.00649836  | 0.0011818   | 4.00E-08 | 106192 |
| rs17388803 | A | C | 0.894352 | 38.33411055 | -0.00982621 | 0.00158706  | 6.50E-10 | 106192 |
| rs59779556 | T | G | 0.553827 | 32.31736191 | 0.00549133  | 0.000965961 | 2.00E-08 | 106192 |
| rs205024   | C | T | 0.616724 | 31.23137418 | 0.00551041  | 0.000986026 | 2.70E-08 | 106192 |
| rs12963463 | C | T | 0.299425 | 45.03801352 | 0.00711437  | 0.0010601   | 1.90E-11 | 106192 |
| rs5757675  | G | T | 0.259528 | 34.49860114 | 0.00645515  | 0.00109902  | 2.70E-09 | 106192 |

long sleep duration (Hassan S. Dashti et al, 2019)

|            |   |   |          |             |             |             |          |       |
|------------|---|---|----------|-------------|-------------|-------------|----------|-------|
| rs7534398  | T | A | 0.798618 | 31.25598361 | -0.00507915 | 0.000908499 | 2.10E-08 | 34184 |
| rs6737318  | A | G | 0.778159 | 52.9827253  | -0.00638002 | 0.000876506 | 3.40E-13 | 34184 |
| rs10899257 | G | A | 0.855527 | 29.88896094 | -0.00563809 | 0.00103128  | 4.60E-08 | 34184 |
| rs75458655 | C | T | 0.977027 | 47.68090733 | -0.0167308  | 0.00242295  | 5.40E-12 | 34184 |
| rs3751046  | A | G | 0.852658 | 31.60599913 | -0.00577495 | 0.00102722  | 2.00E-08 | 34184 |

|             |   |   |          |             |            |             |          |       |
|-------------|---|---|----------|-------------|------------|-------------|----------|-------|
| rs17817288  | A | G | 0.518127 | 33.23278794 | 0.00418824 | 0.000726521 | 8.90E-09 | 34184 |
| rs147114641 | C | A | 0.77403  | 42.99886666 | 0.00568908 | 0.000867588 | 4.90E-11 | 34184 |
| rs146467757 | G | T | 0.772153 | 42.00421843 | 0.00563786 | 0.000869897 | 8.10E-11 | 34184 |
| rs572857764 | T | A | 0.775271 | 41.11506835 | 0.00562714 | 0.000877581 | 1.30E-10 | 34184 |
| rs62073915  | A | G | 0.77868  | 46.15394564 | 0.00605568 | 0.000891371 | 1.00E-11 | 34184 |

Supplementary table 2. Overview of the source of hypothalamic-pituitary-target gland axis function data.

| Trait                                          | GWAS ID            | Year | Sample size | Number of SNPs | Population | Discovery GWAS                                |
|------------------------------------------------|--------------------|------|-------------|----------------|------------|-----------------------------------------------|
| Thyrotropin-releasing hormone                  | prot-a-3102        | 2018 | 3301        | 10534735       | European   | Benjamin B Sun et al, 2018, PMID: 29875488    |
| Prolactin-releasing peptide                    | prot-a-2376        | 2018 | 3301        | 10534735       | European   | Benjamin B Sun et al, 2018, PMID: 29875488    |
| Corticotropin-releasing factor-binding protein | prot-a-659         | 2018 | 3301        | 10534735       | European   | Benjamin B Sun et al, 2018, PMID: 29875488    |
| Somatostatin-28                                | prot-a-2846        | 2018 | 3301        | 10534735       | European   | Benjamin B Sun et al, 2018, PMID: 29875488    |
| Progonadoliberein-1                            | prot-a-1233        | 2018 | 3301        | 10534735       | European   | Benjamin B Sun et al, 2018, PMID: 29875488    |
| growth hormone 1                               | prot-b-30          | 2018 | 3394        | 5270646        | European   | Lasse Folkersen et al, 2018, PMID: 28369058   |
| Luteinizing hormone                            | prot-a-529         | 2018 | 3301        | 10534735       | European   | Benjamin B Sun et al, 2018, PMID: 29875488    |
| Follicle stimulating hormone                   | prot-a-528         | 2018 | 3301        | 10534735       | European   | Benjamin B Sun et al, 2018, PMID: 29875488    |
| Thyroid Stimulating Hormone                    | prot-a-530         | 2018 | 3301        | 10534735       | European   | Benjamin B Sun et al, 2018, PMID: 29875488    |
| Corticotropin                                  | prot-a-2326        | 2018 | 3301        | 10534735       | European   | Benjamin B Sun et al, 2018, PMID: 29875488    |
| prolactin                                      | prot-b-28          | 2018 | 3394        | 5270646        | European   | Lasse Folkersen et al, 2018, PMID: 28369058   |
| Oxytocin-neurophysin 1                         | prot-a-2159        | 2018 | 3301        | 10534735       | European   | Benjamin B Sun et al, 2018, PMID: 29875488    |
| FT4                                            | NA                 | 2018 | 49269       | 8048941        | European   | Alexander Teumer et al, 2018, PMID: 30367059  |
| TSH                                            | NA                 | 2018 | 54288       | 8048941        | European   | Alexander Teumer et al, 2018, PMID: 30367059  |
| Thyroid peroxidase                             | prot-a-3088        | 2018 | 3301        | 10534735       | European   | Benjamin B Sun et al, 2018, PMID: 29875488    |
| Thyroglobulin                                  | prot-a-2960        | 2018 | 3301        | 10534735       | European   | Benjamin B Sun et al, 2018, PMID: 29875488    |
| Plasma cortisol                                | ieu-a-1012         | 2014 | 12597       | 2660192        | European   | Jennifer L Bolton et al, 2014, PMID: 25010111 |
| Aldosterone                                    | NA                 | 2021 | 7669        | NA             | European   | Janne Pott et al, 2021, PMID: 34822396        |
| Estradiol overall                              | ebi-a-GCST90012105 | 2020 | 206927      | 16136413       | European   | Katherine S Ruth et al, 2020, PMID: 32042192  |
| Estradiol male                                 | ebi-a-GCST90020091 | 2021 | 147690      | 7489424        | European   | Daniel Schmitz et al, 2020, PMID: 34255042    |
| Estradiol Female                               | ebi-a-GCST90020092 | 2021 | 163985      | 7488193        | European   | Daniel Schmitz et al, 2020, PMID: 34255042    |
| Progesterone overall                           | NA                 | 2021 | 3549        | NA             | European   | Janne Pott et al, 2021, PMID: 34822396        |
| Progesterone male                              | NA                 | 2021 | 2220        | NA             | European   | Janne Pott et al, 2021, PMID: 34822396        |

|                                      |                    |      |        |          |          |                                              |
|--------------------------------------|--------------------|------|--------|----------|----------|----------------------------------------------|
| Progesterone female                  | NA                 | 2021 | 1329   | NA       | European | Janne Pott et al, 2021, PMID: 34822396       |
| Total testosterone overall           | ebi-a-GCST90012114 | 2020 | 425097 | 16132861 | European | Katherine S Ruth et al, 2020, PMID: 32042192 |
| Total testosterone male              | ebi-a-GCST90012113 | 2020 | 194453 | 16131612 | European | Katherine S Ruth et al, 2020, PMID: 32042192 |
| Total testosterone female            | ebi-a-GCST90012112 | 2020 | 230454 | 16135161 | European | Katherine S Ruth et al, 2020, PMID: 32042192 |
| Bioavailable testosterone overall    | ebi-a-GCST90012104 | 2020 | 382988 | 16137327 | European | Katherine S Ruth et al, 2020, PMID: 32042192 |
| Bioavailable testosterone male       | ebi-a-GCST90012103 | 2020 | 178782 | 16131701 | European | Katherine S Ruth et al, 2020, PMID: 32042192 |
| Bioavailable testosterone female     | ebi-a-GCST90012102 | 2020 | 188507 | 16139906 | European | Katherine S Ruth et al, 2020, PMID: 32042192 |
| Sex hormone-binding globulin overall | ebi-a-GCST90012111 | 2020 | 370125 | 16137172 | European | Katherine S Ruth et al, 2020, PMID: 32042192 |
| Sex hormone-binding globulin male    | ebi-a-GCST90012109 | 2020 | 180726 | 16136768 | European | Katherine S Ruth et al, 2020, PMID: 32042192 |
| Sex hormone-binding globulin female  | ebi-a-GCST90012107 | 2020 | 189473 | 16140044 | European | Katherine S Ruth et al, 2020, PMID: 32042192 |
| dihydroepiandrosterone sulphate      | ebi-a-GCST004941   | 2017 | 9722   | 21770677 | European | Bram P Prins et al, 2017, PMID: 28887542     |

Supplementary table 3. Full result of MR estimation of associations between sleep traits and hypothalamic function.

| Exposure       | Outcome | Mr methods                | No. of SNP | $\beta$     | lo_95% CI    | up_95% CI   | P-value    | Q_pval     | steiger_pval | Correct causal direction |
|----------------|---------|---------------------------|------------|-------------|--------------|-------------|------------|------------|--------------|--------------------------|
| insomnia       |         | Maximum likelihood        | 38         | -0.2551798  | -1.134788    | 0.6244289   | 0.5696223  | 0.5904472  | 0.254159     | FALSE                    |
|                |         | MR Egger                  | 38         | -0.8861542  | -3.764353    | 1.9920449   | 0.5499899  |            |              |                          |
|                |         | Simple median             | 38         | -0.4611966  | -1.731864    | 0.8094707   | 0.4651923  |            |              |                          |
|                |         | Weighted median           | 38         | -0.3580235  | -1.68394     | 0.9678925   | 0.5855022  |            |              |                          |
|                |         | Inverse variance weighted | 38         | -0.265229   | -1.135326    | 0.6048678   | 0.5501997  |            |              |                          |
|                |         | Weighted mode             | 38         | -0.6748056  | -3.058927    | 1.7093156   | 0.5532646  |            |              |                          |
| chronotype     |         | Maximum likelihood        | 146        | -0.20278262 | -0.4208399   | 0.01527462  | 0.06834814 | 0.8826486  | <0.001       | TRUE                     |
|                |         | MR Egger                  | 146        | -0.25658836 | -0.9211233   | 0.40794656  | 0.45041229 |            |              |                          |
|                |         | Simple median             | 146        | -0.17008681 | -0.4777869   | 0.13761331  | 0.28438623 |            |              |                          |
|                |         | Weighted median           | 146        | -0.15441952 | -0.4804979   | 0.17165886  | 0.33094886 |            |              |                          |
|                |         | Inverse variance weighted | 146        | -0.20055978 | -0.4166304   | 0.01551082  | 0.06886573 |            |              |                          |
|                |         | Weighted mode             | 146        | -0.06054566 | -0.912182    | 0.7910907   | 0.89040369 |            |              |                          |
| sleep duration | TRH     | Maximum likelihood        | 73         | 0.000724074 | -0.006020233 | 0.007468381 | 0.8333344  | 0.09754935 | <0.001       | FALSE                    |
|                |         | MR Egger                  | 73         | 0.000365335 | -0.027187413 | 0.027918082 | 0.9793394  |            |              |                          |
|                |         | Simple median             | 73         | 0.001502504 | -0.008372646 | 0.011377655 | 0.7616403  |            |              |                          |
|                |         | Weighted median           | 73         | 0.003134783 | -0.007234094 | 0.013503661 | 0.5549644  |            |              |                          |
|                |         | Inverse variance weighted | 73         | 0.000710073 | -0.006629142 | 0.008049288 | 0.8495983  |            |              |                          |
|                |         | Weighted mode             | 73         | 0.009622802 | -0.009703083 | 0.028948687 | 0.3375155  |            |              |                          |
| short sleep    |         | Maximum likelihood        | 24         | -0.716156   | -2.4242899   | 0.9919779   | 0.41121694 | 0.3152597  | 0.7441294    | TRUE                     |
|                |         | MR Egger                  | 24         | 7.5673379   | -0.3354225   | 15.4700983  | 0.07387071 |            |              |                          |
|                |         | Simple median             | 24         | -0.6531923  | -2.9079134   | 1.6015289   | 0.59486213 |            |              |                          |
|                |         | Weighted median           | 24         | -0.5579269  | -3.0623997   | 1.9465459   | 0.6539761  |            |              |                          |
|                |         | Inverse variance weighted | 24         | -0.736475   | -2.5148316   | 1.0418816   | 0.41696413 |            |              |                          |

|                |     |                           |     |              |              |             |                   |           |           |       |
|----------------|-----|---------------------------|-----|--------------|--------------|-------------|-------------------|-----------|-----------|-------|
| long sleep     |     | Weighted mode             | 24  | -0.999904    | -5.8197823   | 3.8199742   | 0.6912078         |           |           |       |
|                |     | Maximum likelihood        | 8   | -1.4961154   | -5.878247    | 2.886016    | 0.5033878         |           |           |       |
|                |     | MR Egger                  | 8   | 3.5936732    | -12.379219   | 19.566566   | 0.6746785         |           |           |       |
|                |     | Simple median             | 8   | 0.4380005    | -5.491703    | 6.367704    | 0.8859072         | 0.2140952 | 0.0265489 | TRUE  |
|                |     | Weighted median           | 8   | 1.6864486    | -4.270277    | 7.643174    | 0.5764249         |           |           |       |
|                |     | Inverse variance weighted | 8   | -1.4520826   | -6.495328    | 3.591163    | 0.5725259         |           |           |       |
| insomnia       |     | Weighted mode             | 8   | 1.75866      | -4.8846      | 8.40192     | 0.6066565         |           |           |       |
|                |     | Maximum likelihood        | 38  | -0.370453808 | -1.251065    | 0.5101578   | 0.4096393         |           |           |       |
|                |     | MR Egger                  | 38  | 0.49120749   | -2.416367    | 3.3987821   | 0.7424709         |           |           |       |
|                |     | Simple median             | 38  | -0.492050896 | -1.735354    | 0.7512527   | 0.4321987         | 0.4631508 | 0.1740548 | FALSE |
|                |     | Weighted median           | 38  | 0.043895982  | -1.243795    | 1.3315871   | 0.9472392         |           |           |       |
|                |     | Inverse variance weighted | 38  | -0.385545992 | -1.2573      | 0.4862085   | 0.3860306         |           |           |       |
| chronotype     |     | Weighted mode             | 38  | -0.008937226 | -2.061704    | 2.0438299   | 0.9931368         |           |           |       |
|                |     | Maximum likelihood        | 146 | -0.03778286  | -0.2561398   | 0.1805741   | 0.7345014         |           |           |       |
|                |     | MR Egger                  | 146 | -0.05735674  | -0.7242436   | 0.6095301   | 0.8663689         |           |           |       |
|                |     | Simple median             | 146 | -0.06439967  | -0.3776112   | 0.2488119   | 0.686861          | 0.4849737 | <0.001    | FALSE |
|                | PRH | Weighted median           | 146 | -0.13442564  | -0.4589858   | 0.1901346   | 0.4140794         |           |           |       |
|                |     | Inverse variance weighted | 146 | -0.03713089  | -0.2532116   | 0.1789499   | 0.7362658         |           |           |       |
| sleep duration |     | Weighted mode             | 146 | -0.12398408  | -0.8784646   | 0.6304964   | 0.7435081         |           |           |       |
|                |     | Maximum likelihood        | 73  | 0.003284396  | -0.0034399   | 0.010008692 | 0.3383973         |           |           |       |
|                |     | MR Egger                  | 73  | -0.008003479 | -0.033042993 | 0.017036034 | 0.5330076         |           |           |       |
|                |     | Simple median             | 73  | 0.003594352  | -0.006261724 | 0.013450428 | 0.4744274         | 0.4289311 | <0.001    | TRUE  |
|                |     | Weighted median           | 73  | 0.000272891  | -0.009832561 | 0.010378344 | 0.9576276         |           |           |       |
|                |     | Inverse variance weighted | 73  | 0.003280765  | -0.003428483 | 0.009990013 | 0.3378494         |           |           |       |
| short sleep    |     | Weighted mode             | 73  | -0.001680102 | -0.022334748 | 0.018974544 | 0.8735906         |           |           |       |
|                |     | Maximum likelihood        | 24  | -1.899146    | -3.603258    | -0.19503447 | <b>0.02893869</b> | 0.7531616 | 0.5302767 | TRUE  |

|                |       |                           |     |             |              |             |                    |             |            |       |
|----------------|-------|---------------------------|-----|-------------|--------------|-------------|--------------------|-------------|------------|-------|
|                |       | MR Egger                  | 24  | 4.6157694   | -3.287855    | 12.5193938  | 0.26465393         |             |            |       |
|                |       | Simple median             | 24  | -2.3324707  | -4.675104    | 0.01016255  | <b>0.05099791</b>  |             |            |       |
|                |       | Weighted median           | 24  | -0.9160386  | -3.328752    | 1.49667496  | 0.45678201         |             |            |       |
|                |       | Inverse variance weighted | 24  | -1.9545228  | -3.637117    | -0.27192873 | <b>0.0228005</b>   |             |            |       |
|                |       | Weighted mode             | 24  | 0.6725403   | -4.544513    | 5.88959368  | 0.80276975         |             |            |       |
| long sleep     |       | Maximum likelihood        | 8   | -4.823441   | -9.222075    | -0.424807   | <b>0.03161134</b>  |             |            |       |
|                |       | MR Egger                  | 8   | -4.898108   | -17.994866   | 8.19865     | 0.49117599         |             |            |       |
|                |       | Simple median             | 8   | -5.120672   | -11.208217   | 0.966873    | 0.11705592         | 0.6197573   | 0.02554583 | TRUE  |
|                |       | Weighted median           | 8   | -2.736716   | -8.506342    | 3.032911    | 0.3593918          |             |            |       |
|                |       | Inverse variance weighted | 8   | -4.726278   | -9.038174    | -0.414382   | <b>0.03168517</b>  |             |            |       |
|                |       | Weighted mode             | 8   | -2.970338   | -10.2797     | 4.339025    | 0.43194594         |             |            |       |
| insomnia       |       | Maximum likelihood        | 38  | 0.17588279  | -0.7119249   | 1.06369     | 0.6977986          |             |            |       |
|                |       | MR Egger                  | 38  | 0.14354067  | -3.6651721   | 3.952253    | 0.9415248          |             |            |       |
|                |       | Simple median             | 38  | -0.24430894 | -1.597022    | 1.108404    | 0.7163585          | 0.004808487 | <0.001     | FALSE |
|                |       | Weighted median           | 38  | 0.15046348  | -1.2730659   | 1.573993    | 0.8374968          |             |            |       |
|                |       | Inverse variance weighted | 38  | 0.1683134   | -0.9673319   | 1.303959    | 0.7714409          |             |            |       |
|                |       | Weighted mode             | 38  | -0.08009613 | -2.3542657   | 2.194073    | 0.9466479          |             |            |       |
| chronotype     |       | Maximum likelihood        | 146 | -0.2475692  | -0.466149    | -0.02898929 | <b>0.02642242</b>  |             |            |       |
|                | CRFBP | MR Egger                  | 146 | -0.4353058  | -1.1206736   | 0.25006197  | 0.21519867         |             |            |       |
|                |       | Simple median             | 146 | -0.2583349  | -0.576041    | 0.05937126  | 0.11832664         | 0.2962619   | <0.001     | TRUE  |
|                |       | Weighted median           | 146 | -0.2654122  | -0.5976222   | 0.06679789  | 0.11694828         |             |            |       |
|                |       | Inverse variance weighted | 146 | -0.2450328  | -0.4673998   | -0.02266581 | <b>0.03078953</b>  |             |            |       |
|                |       | Weighted mode             | 146 | -0.4959749  | -1.359726    | 0.36777612  | 0.29151923         |             |            |       |
| sleep duration |       | Maximum likelihood        | 73  | 0.005399249 | -0.001320775 | 0.01211927  | 0.115308342        |             |            |       |
|                |       | MR Egger                  | 73  | -0.00590507 | -0.031921938 | 0.0201118   | 0.657772141        | 0.2606881   | <0.001     | FALSE |
|                |       | Simple median             | 73  | 0.014107884 | 0.004287691  | 0.02392808  | <b>0.005232366</b> |             |            |       |

|             |      |                           |     |             |              |            |                    |           |            |       |
|-------------|------|---------------------------|-----|-------------|--------------|------------|--------------------|-----------|------------|-------|
|             |      | Weighted median           | 73  | 0.009766982 | -0.00010182  | 0.01963578 | <b>0.048197016</b> |           |            |       |
|             |      | Inverse variance weighted | 73  | 0.005360097 | -0.001606822 | 0.01232702 | 0.131566437        |           |            |       |
|             |      | Weighted mode             | 73  | 0.018168549 | -0.00329439  | 0.03963149 | 0.093906433        |           |            |       |
| short sleep |      | Maximum likelihood        | 24  | -0.5976446  | -2.301082    | 1.105792   | 0.4916676          |           |            |       |
|             |      | MR Egger                  | 24  | 1.5989659   | -6.305437    | 9.503369   | 0.6955673          |           |            |       |
|             |      | Simple median             | 24  | -0.6766837  | -2.885469    | 1.532102   | 0.573693           | 0.5626117 | 0.4971918  | TRUE  |
|             |      | Weighted median           | 24  | -0.2271794  | -2.712572    | 2.258213   | 0.8481393          |           |            |       |
|             |      | Inverse variance weighted | 24  | -0.6196801  | -2.301925    | 1.062564   | 0.4702972          |           |            |       |
|             |      | Weighted mode             | 24  | -0.2690058  | -4.74409     | 4.206078   | 0.9029783          |           |            |       |
| long sleep  |      | Maximum likelihood        | 8   | -1.4584237  | -5.805668    | 2.888821   | 0.5108303          |           |            |       |
|             |      | MR Egger                  | 8   | -1.6037984  | -14.693262   | 11.485665  | 0.8182079          |           |            |       |
|             |      | Simple median             | 8   | -0.7914033  | -6.588226    | 5.005419   | 0.7893228          | 0.546624  | 0.00466965 | TRUE  |
|             |      | Weighted median           | 8   | -1.8894949  | -7.306861    | 3.527872   | 0.5065755          |           |            |       |
|             |      | Inverse variance weighted | 8   | -1.4323485  | -5.741861    | 2.877164   | 0.5147604          |           |            |       |
|             |      | Weighted mode             | 8   | -1.7932307  | -8.957392    | 5.370931   | 0.6308965          |           |            |       |
| insomnia    |      | Maximum likelihood        | 38  | -0.35437482 | -1.234859    | 0.5261089  | 0.43019634         |           |            |       |
|             |      | MR Egger                  | 38  | -2.4980668  | -5.376421    | 0.3802879  | 0.09755837         |           |            |       |
|             |      | Simple median             | 38  | -0.01016684 | -1.296871    | 1.2765376  | 0.98765355         | 0.5280339 | 0.1965321  | FALSE |
|             |      | Weighted median           | 38  | -0.45278535 | -1.719147    | 0.8135763  | 0.48012604         |           |            |       |
|             |      | Inverse variance weighted | 38  | -0.36869439 | -1.238958    | 0.5015693  | 0.40632952         |           |            |       |
|             | SRIF | Weighted mode             | 38  | -2.03720685 | -4.477353    | 0.4029389  | 0.11820071         |           |            |       |
| chronotype  |      | Maximum likelihood        | 146 | 0.002049782 | -0.2157663   | 0.2198659  | 0.985284           |           |            |       |
|             |      | MR Egger                  | 146 | 0.374386452 | -0.2902378   | 1.0390107  | 0.2714005          |           |            |       |
|             |      | Simple median             | 146 | 0.047731863 | -0.2521843   | 0.347648   | 0.7594084          | 0.9864308 | <0.001     | FALSE |
|             |      | Weighted median           | 146 | 0.069089814 | -0.2379736   | 0.3761532  | 0.6437304          |           |            |       |
|             |      | Inverse variance weighted | 146 | 0.002055808 | -0.214034    | 0.2181456  | 0.9851229          |           |            |       |



|                |                           |     |              |              |             |                   |           |            |       |
|----------------|---------------------------|-----|--------------|--------------|-------------|-------------------|-----------|------------|-------|
| sleep duration | Weighted mode             | 146 | 0.23554344   | -0.5382403   | 1.0093272   | 0.5725891         |           |            |       |
|                | Maximum likelihood        | 73  | -0.000904385 | -0.007634858 | 0.005826089 | 0.7922667         |           |            |       |
|                | MR Egger                  | 73  | -0.012329455 | -0.038045014 | 0.013386103 | 0.3505412         |           |            |       |
|                | Simple median             | 73  | -0.003957784 | -0.01393123  | 0.006015663 | 0.4259586         | 0.308039  | <0.001     | FASLE |
|                | Weighted median           | 73  | -0.004266104 | -0.01400639  | 0.005474183 | 0.3941282         |           |            |       |
| short sleep    | Inverse variance weighted | 73  | -0.00089317  | -0.007781842 | 0.005995501 | 0.7993956         |           |            |       |
|                | Weighted mode             | 73  | -0.010044937 | -0.02832869  | 0.008238816 | 0.3127836         |           |            |       |
|                | Maximum likelihood        | 24  | -0.5145045   | -2.212594    | 1.183585    | 0.5526052         |           |            |       |
|                | MR Egger                  | 24  | 1.9951069    | -5.90849     | 9.898704    | 0.6256722         |           |            |       |
|                | Simple median             | 24  | -0.8086281   | -3.235889    | 1.618633    | 0.4823451         | 0.8414632 | 0.1848812  | TRUE  |
| long sleep     | Weighted median           | 24  | -0.5736272   | -2.900012    | 1.752758    | 0.6311138         |           |            |       |
|                | Inverse variance weighted | 24  | -0.532377    | -2.214654    | 1.1499      | 0.5350828         |           |            |       |
|                | Weighted mode             | 24  | -1.7920993   | -6.047691    | 2.463492    | 0.4374384         |           |            |       |
|                | Maximum likelihood        | 8   | -5.667209    | -10.077345   | -1.2570732  | <b>0.0117795</b>  |           |            |       |
|                | MR Egger                  | 8   | -12.456992   | -25.547839   | 0.6338551   | 0.11143359        |           |            |       |
| insomnia       | Simple median             | 8   | -6.073374    | -11.798441   | -0.348307   | <b>0.03911455</b> | 0.8221315 | 0.02796002 | TRUE  |
|                | Weighted median           | 8   | -5.724122    | -11.389274   | -0.0589709  | <b>0.04765833</b> |           |            |       |
|                | Inverse variance weighted | 8   | -5.613575    | -9.926155    | -1.3009955  | <b>0.01073274</b> |           |            |       |
|                | Weighted mode             | 8   | -5.770263    | -12.650214   | 1.1096877   | 0.13103776        |           |            |       |
|                | Maximum likelihood        | 38  | -0.2362028   | -1.115375    | 0.642969    | 0.5984828         |           |            |       |
| GnRH-<br>1     | MR Egger                  | 38  | -0.2808939   | -3.159248    | 2.5974601   | 0.8493863         |           |            |       |
|                | Simple median             | 38  | -0.2760854   | -1.524632    | 0.9724615   | 0.66472           | 0.6584854 | 0.3213063  | FALSE |
|                | Weighted median           | 38  | -0.450096    | -1.677064    | 0.776872    | 0.4721418         |           |            |       |
|                | Inverse variance weighted | 38  | -0.2460513   | -1.116234    | 0.6241311   | 0.5794377         |           |            |       |
|                | Weighted mode             | 38  | -0.4810696   | -2.480058    | 1.5179185   | 0.6399201         |           |            |       |
| chronotype     | Maximum likelihood        | 146 | 0.09004431   | -0.1280117   | 0.3081004   | 0.4183054         | 0.8672745 | <0.001     | FALSE |

|                |                           |     |              |              |             |            |           |            |       |
|----------------|---------------------------|-----|--------------|--------------|-------------|------------|-----------|------------|-------|
|                | MR Egger                  | 146 | -0.46374924  | -1.1283384   | 0.2008399   | 0.1735415  |           |            |       |
|                | Simple median             | 146 | 0.09497217   | -0.2185681   | 0.4085125   | 0.55272    |           |            |       |
|                | Weighted median           | 146 | 0.0735012    | -0.2393855   | 0.3863879   | 0.6452078  |           |            |       |
|                | Inverse variance weighted | 146 | 0.08872025   | -0.127363    | 0.3048034   | 0.4209673  |           |            |       |
|                | Weighted mode             | 146 | 0.12170622   | -0.8067541   | 1.0501666   | 0.7976013  |           |            |       |
| sleep duration | Maximum likelihood        | 73  | 0.002429535  | -0.004308187 | 0.009167256 | 0.4797216  |           |            |       |
|                | MR Egger                  | 73  | -0.003953617 | -0.030971173 | 0.023063938 | 0.7750879  |           |            |       |
|                | Simple median             | 73  | 0.005457967  | -0.004228239 | 0.015144174 | 0.2694121  | 0.1429911 | <0.001     | FALSE |
|                | Weighted median           | 73  | 0.001532471  | -0.00822137  | 0.011286312 | 0.7581245  |           |            |       |
|                | Inverse variance weighted | 73  | 0.002402726  | -0.004805677 | 0.00961113  | 0.5135545  |           |            |       |
|                | Weighted mode             | 73  | -0.00777753  | -0.029794691 | 0.014239631 | 0.4909338  |           |            |       |
| short sleep    | Maximum likelihood        | 24  | 0.3008859    | -1.4032105   | 2.004982    | 0.7292902  |           |            |       |
|                | MR Egger                  | 24  | 5.3444751    | -2.5591493   | 13.248099   | 0.1986509  |           |            |       |
|                | Simple median             | 24  | 0.789539     | -1.615484    | 3.194562    | 0.5199363  | 0.507516  | 0.4979203  | TRUE  |
|                | Weighted median           | 24  | 1.2858271    | -0.9569158   | 3.52857     | 0.2611307  |           |            |       |
|                | Inverse variance weighted | 24  | 0.2890467    | -1.3935474   | 1.971641    | 0.7363421  |           |            |       |
|                | Weighted mode             | 24  | 2.0881598    | -2.0287379   | 6.205057    | 0.3304969  |           |            |       |
| long sleep     | Maximum likelihood        | 8   | -0.3702911   | -4.743446    | 4.0028636   | 0.86818811 |           |            |       |
|                | MR Egger                  | 8   | -13.4287761  | -26.519623   | -0.3379293  | 0.09107931 |           |            |       |
|                | Simple median             | 8   | -0.7257106   | -7.111459    | 5.6600381   | 0.82373407 | 0.4691555 | 0.00542644 | TRUE  |
|                | Weighted median           | 8   | -1.0756495   | -6.963889    | 4.8125896   | 0.7203073  |           | 2          |       |
|                | Inverse variance weighted | 8   | -0.3614855   | -4.674065    | 3.951094    | 0.86950323 |           |            |       |
|                | Weighted mode             | 8   | -3.250046    | -10.790802   | 4.2907105   | 0.42617405 |           |            |       |

Italics that appear in the table indicate that the analysis is statistically significant ( $p < 0.05$ )

Supplementary table 4. Full result of MR estimation of associations between sleep traits and pituitary function.

| Exposure       | Outcome | Mr methods                | No. of SNP | $\beta$     | lo_95% CI    | up_95% CI   | P-value   | Q_pval    | steiger_pval | Correct causal direction |
|----------------|---------|---------------------------|------------|-------------|--------------|-------------|-----------|-----------|--------------|--------------------------|
| insomnia       |         | Maximum likelihood        | 38         | -0.41793068 | -1.300213    | 0.4643514   | 0.3531805 | 0.1877139 | 0.03511093   | FALSE                    |
|                |         | MR Egger                  | 38         | 1.23781524  | -1.902284    | 4.377914    | 0.4447877 |           |              |                          |
|                |         | Simple median             | 38         | -0.2865821  | -1.592123    | 1.0189584   | 0.6670182 |           |              |                          |
|                |         | Weighted median           | 38         | -0.08615274 | -1.405388    | 1.2330828   | 0.8981506 |           |              |                          |
|                |         | Inverse variance weighted | 38         | -0.44151603 | -1.394551    | 0.5115187   | 0.3638694 |           |              |                          |
|                |         | Weighted mode             | 38         | 0.69678719  | -1.576897    | 2.970471    | 0.5517307 |           |              |                          |
| chronotype     | GH1     | Maximum likelihood        | 146        | -0.17285845 | -0.3911116   | 0.04539471  | 0.1205815 | 0.6619259 | <0.001       | TRUE                     |
|                |         | MR Egger                  | 146        | 0.25058689  | -0.4138421   | 0.91501584  | 0.4609848 |           |              |                          |
|                |         | Simple median             | 146        | -0.15332657 | -0.4742361   | 0.16758295  | 0.3490346 |           |              |                          |
|                |         | Weighted median           | 146        | 0.05255978  | -0.2752537   | 0.38037325  | 0.753327  |           |              |                          |
|                |         | Inverse variance weighted | 146        | -0.17208125 | -0.3881419   | 0.04397935  | 0.1185143 |           |              |                          |
|                |         | Weighted mode             | 146        | 0.48980702  | -0.2667574   | 1.24637145  | 0.2065018 |           |              |                          |
| sleep duration |         | Maximum likelihood        | 73         | 0.000437901 | -0.006272913 | 0.007148715 | 0.8982313 | 0.8472432 | <0.001       | FALSE                    |
|                |         | MR Egger                  | 73         | 0.015595084 | -0.009162914 | 0.040353082 | 0.2210478 |           |              |                          |
|                |         | Simple median             | 73         | 0.00012987  | -0.009663922 | 0.009923662 | 0.9792649 |           |              |                          |
|                |         | Weighted median           | 73         | 0.002850743 | -0.006551374 | 0.012252859 | 0.5523273 |           |              |                          |
|                |         | Inverse variance weighted | 73         | 0.000436758 | -0.006204126 | 0.007077641 | 0.8974326 |           |              |                          |
|                |         | Weighted mode             | 73         | 0.009073155 | -0.009197065 | 0.027343375 | 0.3336364 |           |              |                          |
| short sleep    |         | Maximum likelihood        | 24         | -0.3320744  | -2.035295    | 1.371146    | 0.7023587 | 0.5407865 | 0.5221678    | TRUE                     |

|            |    |                              |     |             |            |           |            |           |            |       |
|------------|----|------------------------------|-----|-------------|------------|-----------|------------|-----------|------------|-------|
|            |    | MR Egger                     | 24  | 2.3561544   | -5.546891  | 10.2592   | 0.5649365  |           |            |       |
|            |    | Simple median                | 24  | -0.5397544  | -2.830103  | 1.750594  | 0.644151   |           |            |       |
|            |    | Weighted median              | 24  | -0.5259448  | -2.882161  | 1.830272  | 0.6617466  |           |            |       |
|            |    | Inverse variance<br>weighted | 24  | -0.3441328  | -2.026498  | 1.338233  | 0.6884763  |           |            |       |
|            |    | Weighted mode                | 24  | -0.3801887  | -5.211719  | 4.451342  | 0.8787733  |           |            |       |
| long sleep |    | Maximum likelihood           | 8   | 2.17319489  | -2.190435  | 6.536825  | 0.329001   |           |            |       |
|            |    | MR Egger                     | 8   | -4.60386255 | -20.688411 | 11.480686 | 0.5951063  |           |            |       |
|            |    | Simple median                | 8   | 0.03846693  | -6.000631  | 6.077565  | 0.9900391  |           |            |       |
|            |    | Weighted median              | 8   | 3.06144563  | -2.741025  | 8.863916  | 0.3010815  | 0.1778807 | 0.03959719 | TRUE  |
|            |    | Inverse variance<br>weighted | 8   | 2.1153588   | -3.088743  | 7.319461  | 0.4256258  |           |            |       |
|            |    | Weighted mode                | 8   | 4.14786692  | -3.364043  | 11.659777 | 0.3150048  |           |            |       |
| insomnia   |    | Maximum likelihood           | 38  | 0.7553078   | -0.1255932 | 1.636209  | 0.09284922 |           |            |       |
|            |    | MR Egger                     | 38  | 2.728889    | -0.1493429 | 5.607121  | 0.07131838 |           |            |       |
|            |    | Simple median                | 38  | 0.5952036   | -0.6216282 | 1.812035  | 0.34275249 |           |            |       |
|            |    | Weighted median              | 38  | 0.8753234   | -0.4253137 | 2.175961  | 0.19381762 | 0.4995814 | 0.1296738  | FALSE |
|            |    | Inverse variance<br>weighted | 38  | 0.7238381   | -0.1463337 | 1.59401   | 0.10301829 |           |            |       |
|            |    | Weighted mode                | 38  | 0.7854676   | -1.2623615 | 2.833297  | 0.42847995 |           |            |       |
| chronotype | LH | Maximum likelihood           | 146 | -0.10642614 | -0.325091  | 0.1122387 | 0.3401091  |           |            |       |
|            |    | MR Egger                     | 146 | 0.22303091  | -0.4865064 | 0.9325682 | 0.5388061  |           |            |       |
|            |    | Simple median                | 146 | -0.02829086 | -0.3500383 | 0.2934566 | 0.8695219  | 0.1195467 | <0.001     | FALSE |
|            |    | Weighted median              | 146 | 0.14694207  | -0.181871  | 0.4757551 | 0.3769895  |           |            |       |
|            |    | Inverse variance<br>weighted | 146 | -0.1049959  | -0.3356493 | 0.1256575 | 0.3722789  |           |            |       |

|                   |     |                              |     |              |              |             |                   |            |            |       |
|-------------------|-----|------------------------------|-----|--------------|--------------|-------------|-------------------|------------|------------|-------|
| sleep<br>duration |     | Weighted mode                | 146 | 0.3895191    | -0.373913    | 1.1529512   | 0.3121009         |            |            |       |
|                   |     | Maximum likelihood           | 73  | 0.000397446  | -0.006346581 | 0.007141473 | 0.9080419         |            |            |       |
|                   |     | MR Egger                     | 73  | -0.013354421 | -0.041014533 | 0.01430569  | 0.3472069         |            |            |       |
|                   |     | Simple median                | 73  | -0.001694915 | -0.011397238 | 0.008007408 | 0.7356842         | 0.07508754 | <0.001     | FALSE |
|                   |     | Weighted median              | 73  | -0.003698913 | -0.013825233 | 0.006427407 | 0.4721368         |            |            |       |
|                   |     | Inverse variance<br>weighted | 73  | 0.000395258  | -0.007025228 | 0.007815744 | 0.9168512         |            |            |       |
| short sleep       |     | Weighted mode                | 73  | -0.008482222 | -0.028680817 | 0.011716374 | 0.3946003         |            |            |       |
|                   |     | Maximum likelihood           | 24  | -0.08637602  | -1.791962    | 1.61921     | 0.9209316         |            |            |       |
|                   |     | MR Egger                     | 24  | -3.06996801  | -11.291058   | 5.151122    | 0.4719461         |            |            |       |
|                   |     | Simple median                | 24  | -0.14642325  | -2.600975    | 2.308128    | 0.904243          |            |            |       |
|                   |     | Weighted median              | 24  | 0.36548607   | -2.064461    | 2.795434    | 0.7719779         | 0.3830498  | 0.7164944  | FALSE |
|                   |     | Inverse variance<br>weighted | 24  | -0.08726786  | -1.819352    | 1.644816    | 0.921336          |            |            |       |
| long sleep        |     | Weighted mode                | 24  | 0.27002401   | -4.514953    | 5.055001    | 0.9075081         |            |            |       |
|                   |     | Maximum likelihood           | 8   | 2.505773     | -1.845128    | 6.856674    | 0.2589805         |            |            |       |
|                   |     | MR Egger                     | 8   | 4.900166     | -8.190681    | 17.991013   | 0.4908137         |            |            |       |
|                   |     | Simple median                | 8   | 2.904449     | -2.671103    | 8.480001    | 0.3052166         |            |            |       |
|                   |     | Weighted median              | 8   | 2.096845     | -3.425046    | 7.618737    | 0.4774433         | 0.6540774  | 0.00439421 | TRUE  |
|                   |     | Inverse variance<br>weighted | 8   | 2.466836     | -1.845744    | 6.779416    | 0.262229          |            |            |       |
| insomnia          |     | Weighted mode                | 8   | 2.152959     | -5.226894    | 9.532811    | 0.5894842         |            |            |       |
|                   |     | Maximum likelihood           | 38  | 0.5204945    | -0.3595335   | 1.400522    | 0.24635578        |            |            |       |
|                   | FSH | MR Egger                     | 38  | 3.0504139    | 0.1722168    | 5.928611    | <b>0.04496994</b> | 0.6128147  | 0.248036   | FALSE |
|                   |     | Simple median                | 38  | 0.4341167    | -0.7250093   | 1.593243    | 0.51206024        |            |            |       |

|                |                           |     |              |              |              |                   |           |           |       |
|----------------|---------------------------|-----|--------------|--------------|--------------|-------------------|-----------|-----------|-------|
| chronotype     | Weighted median           | 38  | 0.6293185    | -0.5840399   | 1.842677     | 0.32502581        |           |           |       |
|                | Inverse variance weighted | 38  | 0.4991088    | -0.3709687   | 1.369186     | 0.26087352        |           |           |       |
|                | Weighted mode             | 38  | 0.9423023    | -1.0828398   | 2.967444     | 0.38794194        |           |           |       |
|                | Maximum likelihood        | 146 | -0.22326212  | -0.4418336   | -0.004690668 | <b>0.04527799</b> |           |           |       |
|                | MR Egger                  | 146 | 0.0691891    | -0.6245205   | 0.76289868   | 0.84528792        |           |           |       |
|                | Simple median             | 146 | -0.01078002  | -0.3158147   | 0.294254641  | 0.9462321         |           |           |       |
|                | Weighted median           | 146 | 0.03715012   | -0.2788864   | 0.35318667   | 0.82655878        | 0.2197795 | <0.001    | FALSE |
| sleep duration | Inverse variance weighted | 146 | -0.21985589  | -0.4452461   | 0.005534314  | 0.05589243        |           |           |       |
|                | Weighted mode             | 146 | 0.35960754   | -0.4935409   | 1.212756009  | 0.36481676        |           |           |       |
|                | Maximum likelihood        | 73  | 0.002693125  | -0.004042186 | 0.009428436  | 0.4332108         |           |           |       |
|                | MR Egger                  | 73  | -0.003483643 | -0.030137019 | 0.023169734  | 0.7985562         |           |           |       |
|                | Simple median             | 73  | 0.00090812   | -0.008856667 | 0.010672906  | 0.8543911         | 0.1855255 | <0.001    | FALSE |
|                | Weighted median           | 73  | -0.00017109  | -0.010842308 | 0.010500127  | 0.9743137         |           |           |       |
|                | Inverse variance weighted | 73  | 0.002647982  | -0.004462856 | 0.009758819  | 0.4654648         |           |           |       |
| short sleep    | Weighted mode             | 73  | -0.001388072 | -0.020305672 | 0.017529529  | 0.8946748         |           |           |       |
|                | Maximum likelihood        | 24  | -0.6519239   | -2.356543    | 1.052695     | 0.4534998         |           |           |       |
|                | MR Egger                  | 24  | 0.7365344    | -7.211969    | 8.685038     | 0.8575439         |           |           |       |
|                | Simple median             | 24  | -0.111897    | -2.362818    | 2.139024     | 0.9239153         |           |           |       |
|                | Weighted median           | 24  | 0.0205257    | -2.342009    | 2.38306      | 0.9867306         | 0.497508  | 0.8967243 | FALSE |
|                | Inverse variance weighted | 24  | -0.6759077   | -2.358478    | 1.006663     | 0.4310745         |           |           |       |
|                | Weighted mode             | 24  | 0.1315614    | -4.104309    | 4.367432     | 0.9490043         |           |           |       |

|                |                           |     |              |             |             |           |           |        |       |
|----------------|---------------------------|-----|--------------|-------------|-------------|-----------|-----------|--------|-------|
| long sleep     | Maximum likelihood        | 8   | 2.390886     | -1.941467   | 6.72324     | 0.2794032 |           |        |       |
|                | MR Egger                  | 8   | 1.867782     | -11.230351  | 14.965914   | 0.7892503 |           |        |       |
|                | Simple median             | 8   | 2.816255     | -2.808763   | 8.441272    | 0.3141368 |           |        |       |
|                | Weighted median           | 8   | 2.824103     | -2.575427   | 8.223632    | 0.2998677 | 0.996088  | <0.001 | TRUE  |
|                | Inverse variance weighted | 8   | 2.381802     | -1.933166   | 6.69677     | 0.2793003 |           |        |       |
|                | Weighted mode             | 8   | 2.735918     | -4.017283   | 9.48912     | 0.455087  |           |        |       |
| insomnia       | Maximum likelihood        | 38  | 0.2178399    | -0.6570439  | 1.092724    | 0.6255313 |           |        |       |
|                | MR Egger                  | 38  | -1.3037561   | -4.1821074  | 1.574595    | 0.3805488 |           |        |       |
|                | Simple median             | 38  | 0.4533247    | -0.7484192  | 1.655069    | 0.4479742 |           |        |       |
|                | Weighted median           | 38  | 0.2947294    | -0.9104198  | 1.499879    | 0.6409821 | 0.9984428 | 0.689  | TRUE  |
|                | Inverse variance weighted | 38  | 0.2102363    | -0.6599907  | 1.080463    | 0.6358477 |           |        |       |
|                | Weighted mode             | 38  | 0.7408816    | -1.7546095  | 3.236373    | 0.5725287 |           |        |       |
| chronotype     | Maximum likelihood        | 146 | 0.17053579   | -0.04799265 | 0.3890642   | 0.1261282 |           |        |       |
|                | MR Egger                  | 146 | 0.05801132   | -0.62789457 | 0.7439172   | 0.868571  |           |        |       |
|                | TSH<br>Simple median      | 146 | 0.21086557   | -0.10108267 | 0.5228138   | 0.1995896 |           |        |       |
|                | Weighted median           | 146 | 0.22418241   | -0.1038104  | 0.5521752   | 0.1913325 | 0.2979422 | <0.001 | FALSE |
|                | Inverse variance weighted | 146 | 0.16737869   | -0.05495155 | 0.3897089   | 0.1400613 |           |        |       |
|                | Weighted mode             | 146 | 0.29467017   | -0.38348504 | 0.9728254   | 0.4189011 |           |        |       |
| sleep duration | Maximum likelihood        | 73  | 0.001984854  | -0.00473942 | 0.008709129 | 0.5628943 |           |        |       |
|                | MR Egger                  | 73  | 0.00739228   | -0.01773244 | 0.032517004 | 0.5659811 | 0.4342393 | <0.001 | FALSE |
|                | Simple median             | 73  | -0.001442911 | -0.01131109 | 0.008425267 | 0.7630783 |           |        |       |
|                | Weighted median           | 73  | -0.000877101 | -0.01129332 | 0.00953912  | 0.8651033 |           |        |       |





|                |                           |     |              |              |             |            |           |           |       |
|----------------|---------------------------|-----|--------------|--------------|-------------|------------|-----------|-----------|-------|
|                | Simple median             | 146 | -0.07039051  | -0.3868755   | 0.2460945   | 0.6764612  |           |           |       |
|                | Weighted median           | 146 | 0.04831613   | -0.2690203   | 0.3656525   | 0.7756773  |           |           |       |
|                | Inverse variance weighted | 146 | -0.03569214  | -0.2541281   | 0.1827439   | 0.7487703  |           |           |       |
|                | Weighted mode             | 146 | 0.12663033   | -0.8033163   | 1.056577    | 0.7864113  |           |           |       |
| sleep duration | Maximum likelihood        | 73  | 0.002611878  | -0.004116802 | 0.009340558 | 0.4467676  |           |           |       |
|                | MR Egger                  | 73  | -0.008421786 | -0.033948561 | 0.017104988 | 0.5199482  |           |           |       |
|                | Simple median             | 73  | 0.001425287  | -0.008404901 | 0.011255476 | 0.7813155  | 0.3419978 | <0.001    | FALSE |
|                | Weighted median           | 73  | -5.45428E-05 | -0.010101003 | 0.009991918 | 0.9916543  |           |           |       |
|                | Inverse variance weighted | 73  | 0.002582539  | -0.004253869 | 0.009418947 | 0.4590484  |           |           |       |
|                | Weighted mode             | 73  | -0.004293799 | -0.021613865 | 0.013026266 | 0.6409016  |           |           |       |
| short sleep    | Maximum likelihood        | 24  | 1.485119     | -0.215975    | 3.186212    | 0.08705276 |           |           |       |
|                | MR Egger                  | 24  | 2.843364     | -5.0593964   | 10.746124   | 0.48808826 |           |           |       |
|                | Simple median             | 24  | 1.399132     | -0.8210493   | 3.619314    | 0.24394722 |           |           |       |
|                | Weighted median           | 24  | 1.219389     | -1.1245664   | 3.563344    | 0.28648795 | 0.8678669 | 0.2713178 | TRUE  |
|                | Inverse variance weighted | 24  | 1.429065     | -0.2533032   | 3.111433    | 0.09593359 |           |           |       |
|                | Weighted mode             | 24  | 1.26084      | -2.825749    | 5.347428    | 0.56466585 |           |           |       |
| long sleep     | Maximum likelihood        | 8   | 1.59388604   | -2.741783    | 5.929555    | 0.4711934  |           |           |       |
|                | MR Egger                  | 8   | -2.3324558   | -15.423303   | 10.758391   | 0.7388521  |           |           |       |
|                | Simple median             | 8   | -0.09769281  | -5.678389    | 5.483003    | 0.971764   | 0.8302873 | <0.001    | TRUE  |
|                | Weighted median           | 8   | 0.93908746   | -4.748732    | 6.626907    | 0.727208   |           |           |       |
|                | Inverse variance weighted | 8   | 1.56938527   | -2.743194    | 5.881965    | 0.4756842  |           |           |       |

|                |     |                           |     |              |              |             |           |           |             |       |
|----------------|-----|---------------------------|-----|--------------|--------------|-------------|-----------|-----------|-------------|-------|
| insomnia       |     | Weighted mode             | 8   | 0.09753293   | -7.068522    | 7.263588    | 0.9790362 |           |             |       |
|                |     | Maximum likelihood        | 38  | -0.08263896  | -0.9642593   | 0.7989814   | 0.8542322 |           |             |       |
|                |     | MR Egger                  | 38  | 1.98568364   | -1.015805    | 4.9871723   | 0.2029949 |           |             |       |
|                |     | Simple median             | 38  | -0.15149508  | -1.5474983   | 1.2445082   | 0.8315607 |           |             |       |
|                |     | Weighted median           | 38  | 0.16460963   | -1.1743913   | 1.5036106   | 0.8095924 | 0.2867622 | 0.07883855  | FALSE |
|                |     | Inverse variance weighted | 38  | -0.08594157  | -1.0057796   | 0.8338965   | 0.8546998 |           |             |       |
| chronotype     |     | Weighted mode             | 38  | 1.12635921   | -1.2435309   | 3.4962493   | 0.3576096 |           |             |       |
|                |     | Maximum likelihood        | 146 | -0.01067871  | -0.2288462   | 0.2074888   | 0.9235709 |           |             |       |
|                |     | MR Egger                  | 146 | -0.02063678  | -0.6850674   | 0.6437939   | 0.9515421 |           |             |       |
|                |     | Simple median             | 146 | -0.15455493  | -0.456651    | 0.1475412   | 0.3159802 |           |             |       |
|                |     | Weighted median           | 146 | -0.1767951   | -0.4994477   | 0.1458575   | 0.2828373 | 0.7232479 | <0.001      | TRUE  |
|                |     | Inverse variance weighted | 146 | -0.0106475   | -0.2266949   | 0.2053999   | 0.923048  |           |             |       |
| sleep duration | PRL | Weighted mode             | 146 | -0.27598161  | -1.0400542   | 0.4880909   | 0.4801137 |           |             |       |
|                |     | Maximum likelihood        | 73  | 0.000725122  | -0.005977121 | 0.007427365 | 0.8320648 |           |             |       |
|                |     | MR Egger                  | 73  | -0.000934505 | -0.025693633 | 0.023824622 | 0.9412359 |           |             |       |
|                |     | Simple median             | 73  | 0.001649746  | -0.007610283 | 0.010909775 | 0.7269472 | 0.9578431 | 0.008007403 | FALSE |
|                |     | Weighted median           | 73  | -0.002070892 | -0.012093728 | 0.007951943 | 0.6854995 |           |             |       |
|                |     | Inverse variance weighted | 73  | 0.000708486  | -0.005933031 | 0.007350002 | 0.8343831 |           |             |       |
| short sleep    |     | Weighted mode             | 73  | -0.000118291 | -0.018558419 | 0.018321836 | 0.9900031 |           |             |       |
|                |     | Maximum likelihood        | 24  | 0.996409     | -0.7052652   | 2.698083    | 0.2511045 |           |             |       |
|                |     | MR Egger                  | 24  | -1.988418    | -9.8914724   | 5.914637    | 0.6268013 | 0.7503541 | 0.3383637   | TRUE  |
|                |     | Simple median             | 24  | 1.275697     | -1.0387122   | 3.590107    | 0.2799874 |           |             |       |

|            |                     |                           |     |             |              |            |                   |           |           |       |
|------------|---------------------|---------------------------|-----|-------------|--------------|------------|-------------------|-----------|-----------|-------|
|            |                     | Weighted median           | 24  | 1.1206      | -1.1909497   | 3.432149   | 0.3420235         |           |           |       |
|            |                     | Inverse variance weighted | 24  | 0.958489    | -0.7237915   | 2.64077    | 0.2641135         |           |           |       |
|            |                     | Weighted mode             | 24  | 2.233929    | -2.2420707   | 6.709928   | 0.3381447         |           |           |       |
| long sleep |                     | Maximum likelihood        | 8   | -2.637431   | -6.978914    | 1.704051   | 0.2337748         |           |           |       |
|            |                     | MR Egger                  | 8   | -5.04125    | -18.132097   | 8.049596   | 0.478943          |           |           |       |
|            |                     | Simple median             | 8   | -3.798074   | -9.441444    | 1.845296   | 0.1871324         |           |           |       |
|            |                     | Weighted median           | 8   | -2.945911   | -8.365489    | 2.473667   | 0.2866977         | 0.9766114 | <0.001    | TRUE  |
|            |                     | Inverse variance weighted | 8   | -2.624631   | -6.937211    | 1.687948   | 0.2329266         |           |           |       |
|            |                     | Weighted mode             | 8   | -4.223689   | -11.138089   | 2.690712   | 0.2701667         |           |           |       |
| insomnia   |                     | Maximum likelihood        | 38  | 0.6256795   | -0.2512366   | 1.502596   | 0.16197507        |           |           |       |
|            |                     | MR Egger                  | 38  | 3.4330148   | 0.5548038    | 6.311226   | <b>0.02507247</b> |           |           |       |
|            |                     | Simple median             | 38  | 0.4787571   | -0.7259469   | 1.683461   | 0.44077321        |           |           |       |
|            |                     | Weighted median           | 38  | 0.9955545   | -0.2305061   | 2.221615   | 0.11186534        | 0.9479442 | 0.6917892 | FALSE |
|            |                     | Inverse variance weighted | 38  | 0.6032175   | -0.266899    | 1.473334   | 0.17421287        |           |           |       |
|            |                     | Weighted mode             | 38  | 1.9974837   | -0.2367184   | 4.231686   | 0.10898432        |           |           |       |
| chronotype | Oxytocin-neurophysi | Maximum likelihood        | 146 | -0.03111105 | -0.2496044   | 0.1873823  | 0.7801815         |           |           |       |
|            | n 1                 | MR Egger                  | 146 | -0.0818662  | -0.7696997   | 0.6059673  | 0.8158753         |           |           |       |
|            |                     | Simple median             | 146 | -0.01804398 | -0.3371162   | 0.3010282  | 0.9128548         |           |           |       |
|            |                     | Weighted median           | 146 | -0.06964571 | -0.3956208   | 0.2563294  | 0.6807366         | 0.2824906 | <0.001    | FALSE |
|            |                     | Inverse variance weighted | 146 | -0.03057009 | -0.2534791   | 0.1923389  | 0.7880855         |           |           |       |
|            |                     | Weighted mode             | 146 | -0.12590632 | -1.1023112   | 0.8504985  | 0.7796767         |           |           |       |
| sleep      |                     | Maximum likelihood        | 73  | 0.003824005 | -0.002893137 | 0.01054115 | 0.2645037         | 0.4789325 | <0.001    | FALSE |

|                              |                              |                    |              |              |            |           |            |           |      |
|------------------------------|------------------------------|--------------------|--------------|--------------|------------|-----------|------------|-----------|------|
| duration                     | MR Egger                     | 73                 | 0.014977994  | -0.009799316 | 0.0397553  | 0.2400361 |            |           |      |
|                              | Simple median                | 73                 | 0.003798671  | -0.005717476 | 0.01331482 | 0.452532  |            |           |      |
|                              | Weighted median              | 73                 | 0.003073671  | -0.007279344 | 0.01342669 | 0.553832  |            |           |      |
|                              | Inverse variance<br>weighted | 73                 | 0.003813821  | -0.002826256 | 0.0104539  | 0.2602699 |            |           |      |
|                              | Weighted mode                | 73                 | -0.000784516 | -0.02073061  | 0.01916158 | 0.9369876 |            |           |      |
|                              | short sleep                  | Maximum likelihood | 24           | 1.0607734    | -0.6405666 | 2.762113  | 0.2216902  |           |      |
| MR Egger                     |                              | 24                 | 3.0963223    | -4.8064022   | 10.999047  | 0.4506894 |            |           |      |
| Simple median                |                              | 24                 | 0.2941876    | -1.8887293   | 2.477105   | 0.8022132 |            |           |      |
| Weighted median              |                              | 24                 | 1.1670644    | -1.1284151   | 3.462544   | 0.342131  | 0.7435823  | 0.319753  | TRUE |
| Inverse variance<br>weighted |                              | 24                 | 1.021181     | -0.6609554   | 2.703317   | 0.2340996 |            |           |      |
| Weighted mode                |                              | 24                 | -0.4435848   | -4.7494577   | 3.862288   | 0.8350058 |            |           |      |
| long sleep                   | Maximum likelihood           | 8                  | 0.02254516   | -4.353277    | 4.398367   | 0.9919428 |            |           |      |
|                              | MR Egger                     | 8                  | 0.48491068   | -19.415566   | 20.385387  | 0.9634584 |            |           |      |
|                              | Simple median                | 8                  | 0.55530762   | -5.225856    | 6.336472   | 0.8487301 |            |           |      |
|                              | Weighted median              | 8                  | 0.36898274   | -5.477588    | 6.215553   | 0.9005139 | 0.05352139 | 0.0908075 | TRUE |
|                              | Inverse variance<br>weighted | 8                  | 0.02139324   | -6.049216    | 6.092002   | 0.9944889 |            |           |      |
|                              | Weighted mode                | 8                  | 0.24473135   | -6.396712    | 6.886174   | 0.9485691 |            |           |      |

Italics that appear in the table indicate that the analysis is statistically significant ( $p < 0.05$ )

Supplementary table 5. Full result of MR estimation of associations between sleep traits and thyroid function.

| Exposure       | Outcome | Mr methods                | No. of SNP | $\beta$      | lo_95% CI    | up_95% CI  | P-value            | Q_pval      | steiger_pval | Correct causal direction |
|----------------|---------|---------------------------|------------|--------------|--------------|------------|--------------------|-------------|--------------|--------------------------|
| insomnia       |         | Maximum likelihood        | 19         | 0.1670807    | -0.19531108  | 0.5294724  | 0.366176933        |             |              |                          |
|                |         | MR Egger                  | 19         | -3.3486105   | -7.63844566  | 0.9412246  | 0.144421324        |             |              |                          |
|                |         | Simple median             | 19         | 0.7262239    | 0.18738808   | 1.2650598  | <b>0.008251088</b> |             |              |                          |
|                |         | Weighted median           | 19         | 0.577392     | 0.04970864   | 1.1050754  | <b>0.031982024</b> | 0.03070881  | <0.001       | TRUE                     |
|                |         | Inverse variance weighted | 19         | 0.1607232    | -0.30205141  | 0.6234978  | 0.496052032        |             |              |                          |
|                |         | Weighted mode             | 19         | 0.9417838    | -0.09510805  | 1.9786757  | 0.091926498        |             |              |                          |
| chronotype     | FT4     | Maximum likelihood        | 67         | -0.000306352 | -0.08655719  | 0.08594449 | 0.9944454          |             |              |                          |
|                |         | MR Egger                  | 67         | -0.034494057 | -0.36112005  | 0.29213193 | 0.8366647          |             |              |                          |
|                |         | Simple median             | 67         | -0.01135222  | -0.14817741  | 0.12547297 | 0.8708186          |             |              |                          |
|                |         | Weighted median           | 67         | 0.026162177  | -0.10934747  | 0.16167182 | 0.7051279          | 0.000239154 | <0.001       | TRUE                     |
|                |         | Inverse variance weighted | 67         | -0.000306352 | -0.11150497  | 0.11089226 | 0.9956916          |             |              |                          |
|                |         | Weighted mode             | 67         | 0.130388439  | -0.19810233  | 0.45887921 | 0.4393571          |             |              |                          |
| sleep duration |         | Maximum likelihood        | 44         | -0.00435004  | -0.006798757 | -1.90E-03  | <b>0.000497954</b> |             |              |                          |
|                |         | MR Egger                  | 44         | -0.010612565 | -0.025479854 | 4.25E-03   | 0.169129058        |             |              |                          |
|                |         | Simple median             | 44         | -0.003660705 | -0.007260565 | -6.08E-05  | <b>0.046247448</b> | 0.000164457 | <0.001       | TRUE                     |
|                |         | Weighted median           | 44         | -0.003655761 | -0.007279496 | -3.20E-05  | <b>0.048005269</b> |             |              |                          |
|                |         | Inverse variance weighted | 44         | -0.004310886 | -0.007661855 | -9.60E-04  | <b>0.011686899</b> |             |              |                          |
|                |         | Weighted mode             | 44         | -0.00548322  | -0.013464007 | 2.50E-03   | 0.185157092        |             |              |                          |
| short sleep    |         | Maximum likelihood        | 10         | 0.870266     | 0.1050578    | 1.635474   | <b>0.02580763</b>  | 0.04437527  | <0.001       | TRUE                     |

|            |     |                              |    |              |            |            |                   |             |        |      |
|------------|-----|------------------------------|----|--------------|------------|------------|-------------------|-------------|--------|------|
|            |     | MR Egger                     | 10 | -2.4652276   | -7.497442  | 2.566987   | 0.3650807         |             |        |      |
|            |     | Simple median                | 10 | 0.8168048    | -0.1805925 | 1.814202   | 0.1084685         |             |        |      |
|            |     | Weighted median              | 10 | 0.7621024    | -0.2982365 | 1.822441   | 0.15891797        |             |        |      |
|            |     | Inverse variance<br>weighted | 10 | 0.8265291    | -0.1992305 | 1.852289   | 0.11426393        |             |        |      |
|            |     | Weighted mode                | 10 | 0.1629106    | -1.436258  | 1.762079   | 0.84617775        |             |        |      |
| long sleep |     | Maximum likelihood           | 3  | 1.971012     | 0.2402428  | 3.701781   | <b>0.02561089</b> |             |        |      |
|            |     | MR Egger                     | 3  | 11.397169    | 2.5208451  | 20.273493  | 0.24078566        |             |        |      |
|            |     | Simple median                | 3  | 2.931025     | 0.564367   | 5.297684   | <b>0.01520777</b> |             |        |      |
|            |     | Weighted median              | 3  | 2.640073     | 0.5045443  | 4.775601   | <b>0.0153898</b>  | 0.08362252  | <0.001 | TRUE |
|            |     | Inverse variance<br>weighted | 3  | 1.886964     | -0.7167557 | 4.490683   | 0.1554772         |             |        |      |
|            |     | Weighted mode                | 3  | 3.078795     | 0.4496693  | 5.70792    | 0.14863431        |             |        |      |
| insomnia   |     | Maximum likelihood           | 19 | -0.2507185   | -0.5855765 | 0.08413953 | 0.1422368         |             |        |      |
|            |     | MR Egger                     | 19 | -0.7463464   | -4.1539166 | 2.66122379 | 0.6731027         |             |        |      |
|            |     | Simple median                | 19 | -0.2170264   | -0.6787044 | 0.24465148 | 0.3568622         |             |        |      |
|            |     | Weighted median              | 19 | -0.2660764   | -0.7305145 | 0.19836171 | 0.2614871         | 0.3459409   | <0.001 | TRUE |
|            |     | Inverse variance<br>weighted | 19 | -0.2564603   | -0.6020534 | 0.08913286 | 0.1458102         |             |        |      |
|            |     | Weighted mode                | 19 | -0.2577126   | -1.0439888 | 0.52856363 | 0.5287012         |             |        |      |
| chronotype | TSH | Maximum likelihood           | 67 | -0.045885047 | -0.1264213 | 0.03465124 | 0.2641236         |             |        |      |
|            |     | MR Egger                     | 67 | -0.204202075 | -0.5196938 | 0.11128965 | 0.2091046         |             |        |      |
|            |     | Simple median                | 67 | 0.007746954  | -0.1155734 | 0.13106727 | 0.9020067         | 2.39969E-05 | <0.001 | TRUE |
|            |     | Weighted median              | 67 | -0.04015992  | -0.1718971 | 0.09157721 | 0.5501711         |             |        |      |
|            |     | Inverse variance<br>weighted | 67 | -0.044308854 | -0.1523161 | 0.06369844 | 0.4213569         |             |        |      |

|                |     |                           |    |              |              |             |            |            |          |       |
|----------------|-----|---------------------------|----|--------------|--------------|-------------|------------|------------|----------|-------|
| sleep duration |     | Weighted mode             | 67 | -0.167302173 | -0.4119932   | 0.07738885  | 0.1848059  |            |          |       |
|                |     | Maximum likelihood        | 44 | 0.001880449  | -0.000381173 | 0.004142071 | 0.1031729  |            |          |       |
|                |     | MR Egger                  | 44 | 0.006264382  | -0.005887219 | 0.018415984 | 0.3180812  |            |          |       |
|                |     | Simple median             | 44 | 0.000565282  | -0.002701627 | 0.00383219  | 0.7345014  | 0.01401262 | <0.001   | TRUE  |
|                |     | Weighted median           | 44 | 0.000714008  | -0.002685454 | 0.004113469 | 0.6805817  |            |          |       |
|                |     | Inverse variance weighted | 44 | 0.001843375  | -0.000907724 | 0.004594475 | 0.1890823  |            |          |       |
| short sleep    |     | Weighted mode             | 44 | -0.001788823 | -0.009113459 | 0.005535812 | 0.6345975  |            |          |       |
|                |     | Maximum likelihood        | 10 | 0.2627982    | -0.4344186   | 0.9600149   | 0.4600453  |            |          |       |
|                |     | MR Egger                  | 10 | 0.6687307    | -2.8456661   | 4.1831276   | 0.7188698  |            |          |       |
|                |     | Simple median             | 10 | 0.1389836    | -0.7339447   | 1.0119119   | 0.7549933  |            |          |       |
|                |     | Weighted median           | 10 | 0.1138883    | -0.7650467   | 0.9928233   | 0.7995206  | 0.6930375  | <0.001   | TRUE  |
|                |     | Inverse variance weighted | 10 | 0.2541131    | -0.4360078   | 0.9442341   | 0.4704776  |            |          |       |
| long sleep     |     | Weighted mode             | 10 | -0.2542906   | -1.7556837   | 1.2471025   | 0.7475162  |            |          |       |
|                |     | Maximum likelihood        | 3  | 0.7360344    | -0.8104768   | 2.282546    | 0.3509093  |            |          |       |
|                |     | MR Egger                  | 3  | -0.3141243   | -9.2798273   | 8.651579    | 0.9563512  |            |          |       |
|                |     | Simple median             | 3  | 1.2382406    | -0.6911731   | 3.167654    | 0.2084388  |            |          |       |
|                |     | Weighted median           | 3  | 1.2392461    | -0.6246219   | 3.103114    | 0.1925194  | 0.5357956  | <0.001   | TRUE  |
|                |     | Inverse variance weighted | 3  | 0.7281592    | -0.8043695   | 2.260688    | 0.3517159  |            |          |       |
| insomnia       |     | Weighted mode             | 3  | 1.2576126    | -0.8538703   | 3.369095    | 0.3634022  |            |          |       |
|                |     | Maximum likelihood        | 38 | -0.1238453   | -1.0022133   | 0.7545227   | 0.78227939 |            |          |       |
|                | TPO | MR Egger                  | 38 | 2.6741668    | -0.2040669   | 5.5524005   | 0.07692097 | 0.7900454  | 0.445927 | FALSE |
|                |     | Simple median             | 38 | -0.522271    | -1.776806    | 0.7322641   | 0.41452271 |            |          |       |

|                |                           |     |             |              |            |            |           |           |       |
|----------------|---------------------------|-----|-------------|--------------|------------|------------|-----------|-----------|-------|
| chronotype     | Weighted median           | 38  | -0.5011861  | -1.6900836   | 0.6877115  | 0.40866321 |           |           |       |
|                | Inverse variance weighted | 38  | -0.1248255  | -0.9950451   | 0.7453941  | 0.77859917 |           |           |       |
|                | Weighted mode             | 38  | -1.2944927  | -4.4056403   | 1.8166548  | 0.41999324 |           |           |       |
|                | Maximum likelihood        | 146 | 0.1361345   | -0.08193622  | 0.3542053  | 0.2211165  |           |           |       |
|                | MR Egger                  | 146 | 0.1175812   | -0.54692706  | 0.7820895  | 0.7292391  |           |           |       |
|                | Simple median             | 146 | 0.0881414   | -0.22635277  | 0.4026356  | 0.5827876  |           |           |       |
|                | Weighted median           | 146 | 0.1406934   | -0.17336209  | 0.4547488  | 0.3799121  | 0.8663316 | <0.001    | FALSE |
| sleep duration | Inverse variance weighted | 146 | 0.1338972   | -0.08216516  | 0.3499596  | 0.2245025  |           |           |       |
|                | Weighted mode             | 146 | 0.2854436   | -0.45763938  | 1.0285265  | 0.4527288  |           |           |       |
|                | Maximum likelihood        | 73  | 0.003543239 | -0.003180995 | 0.01026747 | 0.3017003  |           |           |       |
|                | MR Egger                  | 73  | 0.003376626 | -0.022309311 | 0.02906256 | 0.7974162  |           |           |       |
|                | Simple median             | 73  | 0.003608737 | -0.006221835 | 0.01343931 | 0.4718311  | 0.3381969 | <0.001    | FALSE |
|                | Weighted median           | 73  | 0.004092349 | -0.006076638 | 0.01426134 | 0.4302457  |           |           |       |
|                | Inverse variance weighted | 73  | 0.003533414 | -0.003309102 | 0.01037593 | 0.3114776  |           |           |       |
| short sleep    | Weighted mode             | 73  | 0.006362398 | -0.012708432 | 0.02543323 | 0.5152632  |           |           |       |
|                | Maximum likelihood        | 24  | 0.5385458   | -1.159541    | 2.236633   | 0.5341977  |           |           |       |
|                | MR Egger                  | 24  | 3.6656473   | -4.238299    | 11.569594  | 0.3732025  |           |           |       |
|                | Simple median             | 24  | 0.7102925   | -1.399384    | 2.819969   | 0.5093187  |           |           |       |
|                | Weighted median           | 24  | 0.6967287   | -1.541824    | 2.935282   | 0.5418409  | 0.8702961 | 0.1624422 | TRUE  |
|                | Inverse variance weighted | 24  | 0.5183333   | -1.16449     | 2.201157   | 0.5460381  |           |           |       |
|                | Weighted mode             | 24  | 1.2370511   | -2.47397     | 4.948072   | 0.5200051  |           |           |       |



|                |                           |     |             |              |             |                   |           |            |       |
|----------------|---------------------------|-----|-------------|--------------|-------------|-------------------|-----------|------------|-------|
| long sleep     | Maximum likelihood        | 8   | -5.338876   | -9.755583    | -0.9221694  | <b>0.01782513</b> |           |            |       |
|                | MR Egger                  | 8   | 3.039292    | -10.256432   | 16.3350158  | 0.66984846        |           |            |       |
|                | Simple median             | 8   | -6.409133   | -12.647389   | -0.1708776  | <b>0.04404229</b> |           |            |       |
|                | Weighted median           | 8   | -5.219895   | -11.108397   | 0.6686083   | 0.08230735        | 0.3416165 | 0.08316805 | TRUE  |
|                | Inverse variance weighted | 8   | -5.205568   | -9.78661     | -0.6245258  | <b>0.02593368</b> |           |            |       |
|                | Weighted mode             | 8   | -3.512757   | -11.435208   | 4.409695    | 0.41362227        |           |            |       |
| insomnia       | Maximum likelihood        | 38  | 0.2524302   | -0.6284935   | 1.133354    | 0.5743603         |           |            |       |
|                | MR Egger                  | 38  | -1.255844   | -4.1887538   | 1.677066    | 0.4068659         |           |            |       |
|                | Simple median             | 38  | 0.7786122   | -0.4923418   | 2.049566    | 0.2298537         |           |            |       |
|                | Weighted median           | 38  | 0.3907952   | -0.8826608   | 1.664251    | 0.5475202         | 0.4003928 | 0.1319951  | FALSE |
|                | Inverse variance weighted | 38  | 0.2420329   | -0.6458823   | 1.129948    | 0.5931562         |           |            |       |
|                | Weighted mode             | 38  | 0.3227188   | -1.8372545   | 2.482692    | 0.7712797         |           |            |       |
| chronotype     | Maximum likelihood        | 146 | -0.09377721 | -0.3118639   | 0.12430944  | 0.39934056        |           |            |       |
|                | MR Egger                  | 146 | 0.31887655  | -0.3456842   | 0.98343733  | 0.34855258        |           |            |       |
|                | Tg Simple median          | 146 | -0.38702398 | -0.6955571   | -0.07849086 | <b>0.01394705</b> |           |            |       |
|                | Weighted median           | 146 | -0.05073905 | -0.3680633   | 0.26658519  | 0.75397889        | 0.8442441 | <0.001     | FALSE |
|                | Inverse variance weighted | 146 | -0.09340101 | -0.3094754   | 0.12267339  | 0.39686366        |           |            |       |
|                | Weighted mode             | 146 | 0.27485874  | -0.4497108   | 0.99942829  | 0.45837731        |           |            |       |
| sleep duration | Maximum likelihood        | 73  | 0.006227044 | -0.000473448 | 0.01292753  | 0.06852952        |           |            |       |
|                | MR Egger                  | 73  | 7.26063E-05 | -0.024684796 | 0.02483001  | 0.99542982        | 0.8461508 | <0.001     | FALSE |
|                | Simple median             | 73  | 0.01055409  | 0.000596338  | 0.02051184  | <b>0.03776667</b> |           |            |       |
|                | Weighted median           | 73  | 0.004284352 | -0.005307892 | 0.0138766   | 0.38134043        |           |            |       |

|             |                    |    |             |              |            |            |           |            |      |
|-------------|--------------------|----|-------------|--------------|------------|------------|-----------|------------|------|
|             | Inverse variance   |    |             |              |            |            |           |            |      |
|             | weighted           | 73 | 0.006185883 | -0.00045548  | 0.01282724 | 0.06791374 |           |            |      |
|             | Weighted mode      | 73 | 0.00328917  | -0.016186098 | 0.02276444 | 0.74158814 |           |            |      |
| short sleep | Maximum likelihood | 24 | -0.9111584  | -2.61654213  | 0.7942253  | 0.29500934 |           |            |      |
|             | MR Egger           | 24 | 7.8660793   | -0.03668108  | 15.7688397 | 0.06391979 |           |            |      |
|             | Simple median      | 24 | -1.0159938  | -3.34673401  | 1.3147465  | 0.39289212 |           |            |      |
|             | Weighted median    | 24 | -0.8577911  | -3.21368112  | 1.4980988  | 0.47544632 | 0.4920667 | 0.5507739  | TRUE |
|             | Inverse variance   | 24 | -0.9467464  | -2.62911475  | 0.7356219  | 0.27003472 |           |            |      |
|             | weighted           |    |             |              |            |            |           |            |      |
|             | Weighted mode      | 24 | -1.0340813  | -5.36333799  | 3.2951753  | 0.64407399 |           |            |      |
| long sleep  | Maximum likelihood | 8  | -1.1174648  | -5.475459    | 3.240529   | 0.6152611  |           |            |      |
|             | MR Egger           | 8  | -2.11472    | -16.249015   | 12.019575  | 0.779211   |           |            |      |
|             | Simple median      | 8  | -0.164181   | -5.713814    | 5.385452   | 0.9537607  |           |            |      |
|             | Weighted median    | 8  | -0.9170466  | -6.32993     | 4.495837   | 0.7398427  | 0.427544  | 0.00745687 | TRUE |
|             | Inverse variance   | 8  | -1.0972684  | -5.416193    | 3.221656   | 0.6185131  |           |            |      |
|             | weighted           |    |             |              |            |            |           |            |      |
|             | Weighted mode      | 8  | -1.1746084  | -8.110826    | 5.761609   | 0.7496705  |           |            |      |

Italics that appear in the table indicate that the analysis is statistically significant ( $p < 0.05$ )

Supplementary table 6. Full result of MR estimation of associations between sleep traits and adrenal function.

| Exposure       | Outcome            | Mr methods                | No. of<br>SNP | $\beta$     | lo_95% CI    | up_95% CI   | P-value           | Q_pval          | steiger_pval | Correct causal direction |
|----------------|--------------------|---------------------------|---------------|-------------|--------------|-------------|-------------------|-----------------|--------------|--------------------------|
| insomnia       |                    | Maximum likelihood        | 23            | 0.03803934  | -0.6156624   | 0.6917411   | 0.9091952         | 0.437979        | 0.2879795    | TRUE                     |
|                |                    | MR Egger                  | 23            | -0.31174951 | -7.0727168   | 6.4492178   | 0.9288449         |                 |              |                          |
|                |                    | Simple median             | 23            | -0.23216691 | -1.1894014   | 0.7250676   | 0.6443205         |                 |              |                          |
|                |                    | Weighted median           | 23            | -0.20383497 | -1.1259579   | 0.7182879   | 0.6454013         |                 |              |                          |
|                |                    | Inverse variance weighted | 23            | 0.03636542  | -0.6137793   | 0.6865102   | 0.9127018         |                 |              |                          |
|                |                    | Weighted mode             | 23            | -0.31236068 | -1.8939463   | 1.2692249   | 0.7055779         |                 |              |                          |
| chronotype     |                    | Maximum likelihood        | 62            | -0.2207635  | -0.3978828   | -0.04364421 | <b>0.0145671</b>  | 0.1128979       | 0.4365012    | FALSE                    |
|                |                    | MR Egger                  | 62            | -0.7172232  | -1.3581664   | -0.07628007 | <b>0.03217503</b> |                 |              |                          |
|                |                    | Simple median             | 62            | -0.1776841  | -0.4346575   | 0.07928921  | 0.19719786        |                 |              |                          |
|                |                    | Weighted median           | 62            | -0.1729567  | -0.4299876   | 0.08407416  | 0.199798          |                 |              |                          |
|                |                    | Inverse variance weighted | 62            | -0.2166846  | -0.4100155   | -0.02335364 | <b>0.02803756</b> |                 |              |                          |
|                |                    | Weighted mode             | 62            | -0.1609874  | -0.6385959   | 0.31662118  | 0.52533509        |                 |              |                          |
| sleep duration | Plasma<br>cortisol | Maximum likelihood        | 26            | 1.76E-03    | -0.004638001 | 0.008155869 | 0.589934          | 0.00528020<br>6 | 0.008718735  | FALSE                    |
|                |                    | MR Egger                  | 26            | 1.52E-02    | -0.039797045 | 0.070142284 | 0.5934972         |                 |              |                          |
|                |                    | Simple median             | 26            | 2.19E-03    | -0.007492369 | 0.011878958 | 0.6501105         |                 |              |                          |
|                |                    | Weighted median           | 26            | 8.92E-06    | -0.009086971 | 0.009104808 | 0.9984814         |                 |              |                          |
|                |                    | Inverse variance weighted | 26            | 1.72E-03    | -0.006805643 | 0.010250903 | 0.6921778         |                 |              |                          |
|                |                    | Weighted mode             | 26            | -1.76E-04   | -0.015590372 | 0.015238269 | 0.9818926         |                 |              |                          |
| short sleep    |                    | Maximum likelihood        | 13            | -1.425964   | -2.626342    | -0.22558623 | <b>0.01989397</b> | 0.5959645       | <0.001       | TRUE                     |
|                |                    | MR Egger                  | 13            | 0.7637364   | -5.119942    | 6.64741476  | 0.80386482        |                 |              |                          |
|                |                    | Simple median             | 13            | -1.6658117  | -3.369566    | 0.03794298  | <b>0.04794556</b> |                 |              |                          |
|                |                    | Weighted median           | 13            | -1.6455935  | -3.215101    | -0.07608565 | <b>0.04906724</b> |                 |              |                          |
|                |                    | Inverse variance weighted | 13            | -1.4430481  | -2.626589    | -0.25950699 | <b>0.01685958</b> |                 |              |                          |

|             |                |                           |                    |             |              |             |             |            |             |       |
|-------------|----------------|---------------------------|--------------------|-------------|--------------|-------------|-------------|------------|-------------|-------|
| long sleep  |                | Weighted mode             | 13                 | -1.6283951  | -4.28097     | 1.02418017  | 0.2564192   |            |             |       |
|             |                | Maximum likelihood        | 2                  | -0.03994982 | -4.584858    | 4.504959    | 0.9862544   |            |             |       |
|             |                | MR Egger                  | NA                 | NA          | NA           | NA          | NA          |            |             |       |
|             |                | Simple median             | NA                 | NA          | NA           | NA          | NA          | 0.1828314  | 0.003540557 | TRUE  |
|             |                | Weighted median           | NA                 | NA          | NA           | NA          | NA          |            |             |       |
| insomnia    |                | Inverse variance weighted | 2                  | -0.03910677 | -6.007675    | 5.929462    | 0.9897537   |            |             |       |
|             |                | Weighted mode             | NA                 | NA          | NA           | NA          | NA          |            |             |       |
|             |                | Maximum likelihood        | 36                 | -0.01950539 | -0.5850665   | 0.5460557   | 0.946106    |            |             |       |
|             |                | MR Egger                  | 36                 | -0.28028851 | -2.5453101   | 1.9847331   | 0.8098165   |            |             |       |
|             |                | Simple median             | 36                 | -0.1455523  | -0.995189    | 0.7040844   | 0.7389772   | 0.04292362 | 0.01378162  | FALSE |
| chronotype  |                | Weighted median           | 36                 | -0.45650556 | -1.3186154   | 0.4056043   | 0.2857746   |            |             |       |
|             |                | Inverse variance weighted | 36                 | -0.02077813 | -0.6889779   | 0.6474216   | 0.951401    |            |             |       |
|             |                | Weighted mode             | 36                 | -0.91403483 | -2.4340727   | 0.6060031   | 0.2425813   |            |             |       |
|             |                | Maximum likelihood        | 139                | -0.08518071 | -0.2230161   | 0.0526547   | 0.2257967   |            |             |       |
|             |                | MR Egger                  | 139                | -0.34815009 | -0.7723247   | 0.07602453  | 0.1099817   |            |             |       |
| ALD         |                | Simple median             | 139                | -0.01704852 | -0.2178268   | 0.18372974  | 0.8669144   | 0.5738988  | <0.001      | TRUE  |
|             |                | Weighted median           | 139                | -0.07949285 | -0.275422    | 0.11643625  | 0.4427111   |            |             |       |
|             |                | Inverse variance weighted | 139                | -0.08410118 | -0.2205152   | 0.05231287  | 0.2269059   |            |             |       |
|             |                | Weighted mode             | 139                | -0.04963166 | -0.4936816   | 0.39441826  | 0.8294518   |            |             |       |
|             | sleep duration |                           | Maximum likelihood | 73          | 0.000417352  | -0.00374251 | 0.004577215 | 0.8441064  |             |       |
|             |                | MR Egger                  | 73                 | 0.006052231 | -0.010886116 | 0.022990579 | 0.486012    |            |             |       |
|             |                | Simple median             | 73                 | 0.000975442 | -0.005038595 | 0.006989478 | 0.7517574   | 0.1210391  | <0.001      | FALSE |
|             |                | Weighted median           | 73                 | 0.000626557 | -0.00620392  | 0.007457034 | 0.8492026   |            |             |       |
|             |                | Inverse variance weighted | 73                 | 0.000407669 | -0.004076586 | 0.004891924 | 0.8585771   |            |             |       |
| short sleep |                | Weighted mode             | 73                 | 0.00294332  | -0.007946657 | 0.013833297 | 0.6100974   |            |             |       |
|             |                | Maximum likelihood        | 24                 | -0.2754116  | -1.310329    | 0.7595056   | 0.6019529   | 0.6012551  | 0.3574092   | TRUE  |

|            |                           |    |            |            |           |           |           |        |      |
|------------|---------------------------|----|------------|------------|-----------|-----------|-----------|--------|------|
|            | MR Egger                  | 24 | 1.9525825  | -2.821029  | 6.7261941 | 0.4312944 |           |        |      |
|            | Simple median             | 24 | -0.7120536 | -2.069119  | 0.6450117 | 0.3101581 |           |        |      |
|            | Weighted median           | 24 | -0.4155007 | -1.847129  | 1.0161272 | 0.5586858 |           |        |      |
|            | Inverse variance weighted | 24 | -0.2876202 | -1.310741  | 0.7355008 | 0.5816364 |           |        |      |
|            | Weighted mode             | 24 | -0.372948  | -2.758287  | 2.012391  | 0.7508433 |           |        |      |
| long sleep | Maximum likelihood        | 6  | -0.4867153 | -3.522357  | 2.548926  | 0.7533283 |           |        |      |
|            | MR Egger                  | 6  | -4.0983568 | -23.929754 | 15.733041 | 0.7061652 |           |        |      |
|            | Simple median             | 6  | 0.3274637  | -3.544513  | 4.199441  | 0.8614923 | 0.8263644 | <0.001 | TRUE |
|            | Weighted median           | 6  | -0.3520553 | -4.119748  | 3.415637  | 0.8508491 |           |        |      |
|            | Inverse variance weighted | 6  | -0.4830794 | -3.505155  | 2.538996  | 0.7540479 |           |        |      |
|            | Weighted mode             | 6  | -0.2036826 | -4.923322  | 4.515957  | 0.9356046 |           |        |      |

Italics that appear in the table indicate that the analysis is statistically significant ( $p < 0.05$ )

Supplementary table 7. Full result of MR estimation of associations between sleep traits and gonadal function (without distinguishing gender).

| Exposure       | Outcome | Mr methods                | No. of<br>SNP | $\beta$      | lo_95% CI    | up_95% CI   | P-value   | Q_pval      | steiger_pval | Correct causal direction |
|----------------|---------|---------------------------|---------------|--------------|--------------|-------------|-----------|-------------|--------------|--------------------------|
| insomnia       |         | Maximum likelihood        | 39            | -0.01791137  | -0.04823507  | 0.012412336 | 0.2469794 | 0.01913333  | <0.001       | TURE                     |
|                |         | MR Egger                  | 39            | -0.10323296  | -0.22510091  | 0.018634992 | 0.1053083 |             |              |                          |
|                |         | Simple median             | 39            | 0.01476238   | -0.03432279  | 0.063847553 | 0.5373354 |             |              |                          |
|                |         | Weighted median           | 39            | -0.03742539  | -0.08398626  | 0.009135471 | 0.1135083 |             |              |                          |
|                |         | Inverse variance weighted | 39            | -0.01730929  | -0.0541216   | 0.019503021 | 0.3567375 |             |              |                          |
|                |         | Weighted mode             | 39            | -0.02440933  | -0.102211    | 0.053392338 | 0.5449589 |             |              |                          |
| chronotype     |         | Maximum likelihood        | 146           | -0.005714832 | -0.01317503  | 0.001745362 | 0.1332405 | 0.010529836 | <0.001       | TRUE                     |
|                |         | MR Egger                  | 146           | -0.003098534 | -0.02843039  | 0.022233322 | 0.8108707 |             |              |                          |
|                |         | Simple median             | 146           | -0.008724589 | -0.01985224  | 0.002403067 | 0.1213284 |             |              |                          |
|                |         | Weighted median           | 146           | -0.004012558 | -0.0151671   | 0.007141988 | 0.4781209 |             |              |                          |
|                |         | Inverse variance weighted | 146           | -0.005683835 | -0.01404525  | 0.002677579 | 0.1827457 |             |              |                          |
|                |         | Weighted mode             | 146           | 0.001808799  | -0.0252384   | 0.028855994 | 0.8974371 |             |              |                          |
| sleep duration | E2      | Maximum likelihood        | 74            | -0.000171732 | -0.000400192 | 5.67269E-05 | 0.1406627 | 0.1287559   | <0.001       | TRUE                     |
|                |         | MR Egger                  | 74            | -0.000189833 | -0.001114403 | 0.000734738 | 0.6885623 |             |              |                          |
|                |         | Simple median             | 74            | -0.00016183  | -0.000492603 | 0.000168944 | 0.3563876 |             |              |                          |
|                |         | Weighted median           | 74            | 6.24826E-05  | -0.000268303 | 0.000393268 | 0.7171437 |             |              |                          |
|                |         | Inverse variance weighted | 74            | -0.000170868 | -0.000416715 | 7.49777E-05 | 0.1731212 |             |              |                          |
|                |         | Weighted mode             | 74            | 0.000246315  | -0.000413844 | 0.000906474 | 0.491046  |             |              |                          |
| short sleep    |         | Maximum likelihood        | 24            | -0.01097777  | -0.06941016  | 0.04745461  | 0.7127033 | 0.2524757   | <0.001       | TRUE                     |
|                |         | MR Egger                  | 24            | -0.21933044  | -0.5035019   | 0.06484102  | 0.1445704 |             |              |                          |
|                |         | Simple median             | 24            | 0.00245908   | -0.08218868  | 0.08710684  | 0.952151  |             |              |                          |
|                |         | Weighted median           | 24            | -0.01790268  | -0.10072271  | 0.06491736  | 0.6660877 |             |              |                          |
|                |         | Inverse variance weighted | 24            | -0.01105881  | -0.07349737  | 0.05137975  | 0.7284819 |             |              |                          |

|                |                           |     |              |              |              |                   |           |           |       |
|----------------|---------------------------|-----|--------------|--------------|--------------|-------------------|-----------|-----------|-------|
| long sleep     | Weighted mode             | 24  | -0.08254636  | -0.22967275  | 0.06458002   | 0.3007875         |           |           |       |
|                | Maximum likelihood        | 9   | 0.02094631   | -0.1257676   | 0.1676603    | 0.7796089         |           |           |       |
|                | MR Egger                  | 9   | 0.3453047    | -0.1046563   | 0.7952657    | 0.1762598         |           |           |       |
|                | Simple median             | 9   | 0.10379206   | -0.1172364   | 0.3248205    | 0.3557691         | 0.5131219 | <0.001    | TRUE  |
|                | Weighted median           | 9   | 0.10433111   | -0.078853    | 0.2875152    | 0.2709749         |           |           |       |
|                | Inverse variance weighted | 9   | 0.02049531   | -0.1248686   | 0.1658593    | 0.782282          |           |           |       |
| insomnia       | Weighted mode             | 9   | 0.11998334   | -0.1284283   | 0.368395     | 0.3543088         |           |           |       |
|                | Maximum likelihood        | 36  | 0.02405568   | -0.4683147   | 0.5164261    | 0.9237116         |           |           |       |
|                | MR Egger                  | 36  | 0.16808422   | -1.5127993   | 1.8489677    | 0.8457807         |           |           |       |
|                | Simple median             | 36  | -0.28622444  | -0.9894405   | 0.4169916    | 0.41983           | 0.400191  | 0.1878843 | FALSE |
|                | Weighted median           | 36  | -0.03581988  | -0.7735445   | 0.7019047    | 0.9239293         |           |           |       |
|                | Inverse variance weighted | 36  | 0.02269808   | -0.4739903   | 0.5193865    | 0.9286291         |           |           |       |
| chronotype     | Weighted mode             | 36  | -0.630266    | -1.8158031   | 0.5552711    | 0.3218703         |           |           |       |
|                | Maximum likelihood        | 139 | -0.0245683   | -0.14531     | 0.09617341   | 0.6900279         |           |           |       |
|                | MR Egger                  | 139 | 0.02436291   | -0.3500218   | 0.39874766   | 0.8986952         |           |           |       |
|                | Simple median             | 139 | -0.04126603  | -0.2155543   | 0.13302226   | 0.6541918         | 0.4406196 | <0.001    | FALSE |
|                | Weighted median           | 139 | -0.10022146  | -0.2714798   | 0.07103685   | 0.2561925         |           |           |       |
|                | Inverse variance weighted | 139 | -0.02460333  | -0.144852    | 0.09564535   | 0.688403          |           |           |       |
| sleep duration | Weighted mode             | 139 | -0.07073381  | -0.4331172   | 0.29164962   | 0.7018187         |           |           |       |
|                | Maximum likelihood        | 73  | -0.003756578 | -0.00738784  | -0.000125316 | <b>0.04259697</b> |           |           |       |
|                | MR Egger                  | 73  | -0.006114949 | -0.02030495  | 0.008075052  | 0.40115463        |           |           |       |
|                | Simple median             | 73  | -0.002572424 | -0.007819834 | 0.002674985  | 0.34368705        | 0.3033175 | <0.001    | TRUE  |
|                | Weighted median           | 73  | -0.001499494 | -0.006999599 | 0.004000611  | 0.58909598        |           |           |       |
|                | Inverse variance weighted | 73  | -0.00373919  | -0.007466478 | -1.19015E-05 | <b>0.04926876</b> |           |           |       |
| short sleep    | Weighted mode             | 73  | -0.000969822 | -0.010919792 | 0.008980147  | 0.84891949        |           |           |       |
|                | Maximum likelihood        | 24  | 1.1018929    | 0.1912548    | 2.012531     | <b>0.0177091</b>  | 0.5720261 | 0.9564324 | TRUE  |

|                |    |                           |     |              |              |              |                   |           |        |      |
|----------------|----|---------------------------|-----|--------------|--------------|--------------|-------------------|-----------|--------|------|
|                |    | MR Egger                  | 24  | 0.9695932    | -3.23027     | 5.169456     | 0.65534533        |           |        |      |
|                |    | Simple median             | 24  | 0.6629186    | -0.5900272   | 1.915864     | 0.29875629        |           |        |      |
|                |    | Weighted median           | 24  | 0.545556     | -0.701005    | 1.792117     | 0.40465454        |           |        |      |
|                |    | Inverse variance weighted | 24  | 1.0580915    | 0.161611     | 1.954572     | <b>0.02070425</b> |           |        |      |
|                |    | Weighted mode             | 24  | 0.2686674    | -2.2481776   | 2.785512     | 0.84154871        |           |        |      |
| long sleep     |    | Maximum likelihood        | 6   | 0.49826794   | -2.170991    | 3.167527     | 0.7144611         |           |        |      |
|                |    | MR Egger                  | 6   | -0.04926835  | -17.458535   | 17.359999    | 0.9958399         |           |        |      |
|                |    | Simple median             | 6   | -0.21355054  | -3.73426     | 3.307159     | 0.9002343         | 0.8384978 | <0.001 | TRUE |
|                |    | Weighted median           | 6   | -0.37737443  | -3.551435    | 2.796686     | 0.8171856         |           |        |      |
|                |    | Inverse variance weighted | 6   | 0.49207151   | -2.160979    | 3.145122     | 0.7162099         |           |        |      |
|                |    | Weighted mode             | 6   | -0.4933955   | -4.420525    | 3.433734     | 0.8076315         |           |        |      |
| insomnia       |    | Maximum likelihood        | 39  | -0.03474406  | -0.08233988  | 0.01285176   | 0.1524981         |           |        |      |
|                |    | MR Egger                  | 39  | -0.1248372   | -0.43471855  | 0.18504414   | 0.4347952         |           |        |      |
|                |    | Simple median             | 39  | -0.02601846  | -0.10906947  | 0.05703255   | 0.5400127         | <0.001    | <0.001 | TRUE |
|                |    | Weighted median           | 39  | 0.01178287   | -0.06343347  | 0.08699922   | 0.7606422         |           |        |      |
|                |    | Inverse variance weighted | 39  | -0.03519744  | -0.12675564  | 0.05636076   | 0.4511634         |           |        |      |
|                |    | Weighted mode             | 39  | 0.07712472   | -0.04192762  | 0.19617707   | 0.2025117         |           |        |      |
| chronotype     |    | Maximum likelihood        | 146 | -0.03669634  | -0.04821653  | -0.02517616  | <b>4.28E-10</b>   |           |        |      |
|                | TT | MR Egger                  | 146 | -0.0780863   | -0.13103345  | -0.025139146 | <b>4.44E-03</b>   |           |        |      |
|                |    | Simple median             | 146 | -0.03405433  | -0.05204373  | -0.016064931 | <b>2.15E-04</b>   | <0.001    | <0.001 | TRUE |
|                |    | Weighted median           | 146 | -0.03700066  | -0.0560091   | -0.017992213 | <b>1.07E-04</b>   |           |        |      |
|                |    | Inverse variance weighted | 146 | -0.03636181  | -0.05397917  | -0.018744451 | <b>5.22E-05</b>   |           |        |      |
|                |    | Weighted mode             | 146 | -0.04300582  | -0.0888054   | 0.002793768  | 6.80E-02          |           |        |      |
| sleep duration |    | Maximum likelihood        | 74  | 8.85735E-05  | -0.000270971 | 0.000448118  | 0.62920593        |           |        |      |
|                |    | MR Egger                  | 74  | -0.000157076 | -0.002649107 | 0.002334955  | 0.90202292        | <0.001    | <0.001 | TRUE |
|                |    | Simple median             | 74  | 0.000491338  | -0.000100616 | 0.001083292  | 0.08642156        |           |        |      |



|             |    |                           |     |              |              |             |                 |            |        |      |
|-------------|----|---------------------------|-----|--------------|--------------|-------------|-----------------|------------|--------|------|
|             |    | Weighted median           | 74  | 0.000322387  | -0.000234307 | 0.000879081 | 0.26716967      |            |        |      |
|             |    | Inverse variance weighted | 74  | 8.67767E-05  | -0.000576781 | 0.000750334 | 0.79770455      |            |        |      |
|             |    | Weighted mode             | 74  | -1.31004E-06 | -0.001010618 | 0.001007998 | 0.99799176      |            |        |      |
| short sleep |    | Maximum likelihood        | 24  | 0.04015392   | -0.05032032  | 0.1306282   | 0.3843663       |            |        |      |
|             |    | MR Egger                  | 24  | 0.53644007   | -0.09421712  | 1.1670973   | 0.1096518       |            |        |      |
|             |    | Simple median             | 24  | 0.05478233   | -0.08104099  | 0.1906057   | 0.4061814       |            |        |      |
|             |    | Weighted median           | 24  | 0.07073028   | -0.06457404  | 0.2060346   | 0.2981502       | <0.001     | <0.001 | TRUE |
|             |    | Inverse variance weighted | 24  | 0.03844679   | -0.1009924   | 0.177886    | 0.5889075       |            |        |      |
|             |    | Weighted mode             | 24  | 0.06791998   | -0.16501765  | 0.3008576   | 0.5402256       |            |        |      |
| long sleep  |    | Maximum likelihood        | 9   | 0.1803252    | -0.05030126  | 0.4109516   | 0.1253966       |            |        |      |
|             |    | MR Egger                  | 9   | -0.2708586   | -1.4494763   | 0.9077591   | 0.6660213       |            |        |      |
|             |    | Simple median             | 9   | 0.1438215    | -0.23080862  | 0.5184516   | 0.4484183       |            |        |      |
|             |    | Weighted median           | 9   | 0.1465066    | -0.17544798  | 0.4684612   | 0.3623427       | 0.00362451 | <0.001 | TRUE |
|             |    | Inverse variance weighted | 9   | 0.1744511    | -0.19806452  | 0.5469667   | 0.3586824       |            |        |      |
|             |    | Weighted mode             | 9   | 0.2306555    | -0.18675158  | 0.6480625   | 0.2737437       |            |        |      |
| insomnia    |    | Maximum likelihood        | 39  | 0.06996653   | -0.004829844 | 0.1447629   | 0.06673769      |            |        |      |
|             |    | MR Egger                  | 39  | -0.04574836  | -0.56560725  | 0.4741105   | 0.86399791      |            |        |      |
|             |    | Simple median             | 39  | 0.05140936   | -0.068334397 | 0.1711531   | 0.40710812      |            |        |      |
|             |    | Weighted median           | 39  | 0.0528107    | -0.064931785 | 0.1705532   | 0.37245576      | <0.001     | <0.001 | TRUE |
|             |    | Inverse variance weighted | 39  | 0.0678552    | -0.085390594 | 0.221101    | 0.38546991      |            |        |      |
|             | BT | Weighted mode             | 39  | 0.05588336   | -0.147106948 | 0.2588737   | 0.5431236       |            |        |      |
| chronotype  |    | Maximum likelihood        | 146 | -0.06726924  | -0.08529841  | -0.04924006 | <b>2.61E-13</b> |            |        |      |
|             |    | MR Egger                  | 146 | -0.06837166  | -0.16142085  | 0.02467753  | 1.52E-01        |            |        |      |
|             |    | Simple median             | 146 | -0.05552326  | -0.08406939  | -0.02697714 | <b>1.67E-04</b> | <0.001     | <0.001 | TRUE |
|             |    | Weighted median           | 146 | -0.05595883  | -0.08608019  | -0.02583748 | <b>2.91E-04</b> |            |        |      |
|             |    | Inverse variance weighted | 146 | -0.0664256   | -0.09710917  | -0.03574204 | <b>2.20E-05</b> |            |        |      |

|                |                           |     |              |              |              |                   |           |        |      |
|----------------|---------------------------|-----|--------------|--------------|--------------|-------------------|-----------|--------|------|
|                | Weighted mode             | 146 | -0.06347475  | -0.14329167  | 0.01634218   | 1.10E-01          |           |        |      |
| sleep duration | Maximum likelihood        | 74  | 0.000590793  | 3.93539E-05  | 0.001142231  | <b>0.03573967</b> |           |        |      |
|                | MR Egger                  | 74  | -0.000406472 | -0.003882275 | 0.003069332  | 0.81935656        |           |        |      |
|                | Simple median             | 74  | 0.000809599  | -4.03812E-05 | 0.001659579  | 0.06466939        | <0.001    | <0.001 | TRUE |
|                | Weighted median           | 74  | 0.000859895  | -4.69368E-05 | 0.001766727  | 0.06721254        |           |        |      |
|                | Inverse variance weighted | 74  | 0.000575689  | -0.000351491 | 0.001502868  | 0.22361552        |           |        |      |
|                | Weighted mode             | 74  | 0.001226586  | -0.000366966 | 0.002820138  | 0.14247948        |           |        |      |
| short sleep    | Maximum likelihood        | 24  | 0.045296598  | -0.09711107  | 0.1877043    | 0.5330014         |           |        |      |
|                | MR Egger                  | 24  | -0.003749213 | -1.21510599  | 1.2076076    | 0.9952145         |           |        |      |
|                | Simple median             | 24  | 0.123820343  | -0.09897197  | 0.3466127    | 0.2743923         | <0.001    | <0.001 | TRUE |
|                | Weighted median           | 24  | 0.107301172  | -0.10364954  | 0.3182519    | 0.3355977         |           |        |      |
|                | Inverse variance weighted | 24  | 0.043329438  | -0.2104137   | 0.2970726    | 0.7378577         |           |        |      |
|                | Weighted mode             | 24  | 0.238008766  | -0.19316956  | 0.6691871    | 0.3160051         |           |        |      |
| long sleep     | Maximum likelihood        | 9   | 0.17032      | -0.178243949 | 0.5188839    | 0.33820325        |           |        |      |
|                | MR Egger                  | 9   | 0.6490926    | -0.563154255 | 1.8613395    | 0.32883649        |           |        |      |
|                | Simple median             | 9   | 0.2396908    | -0.322149273 | 0.8015308    | 0.41863186        | 0.2629947 | <0.001 | TRUE |
|                | Weighted median           | 9   | 0.438495     | -0.001768756 | 0.8787587    | 0.06851126        |           |        |      |
|                | Inverse variance weighted | 9   | 0.164842     | -0.219213096 | 0.5488971    | 0.40020208        |           |        |      |
|                | Weighted mode             | 9   | 0.4872182    | -0.05675331  | 1.0311896    | 0.09895206        |           |        |      |
| insomnia       | Maximum likelihood        | 39  | -0.042110038 | -0.07723838  | -0.006981698 | <b>0.01879629</b> |           |        |      |
|                | MR Egger                  | 39  | -0.124798508 | -0.38441892  | 0.134821906  | 0.35221991        |           |        |      |
|                | Simple median             | 39  | -0.013310259 | -0.07485679  | 0.048236275  | 0.6595575         | <0.001    | <0.001 | TRUE |
|                | Weighted median           | 39  | -0.014142759 | -0.07687064  | 0.048585125  | 0.65947337        |           |        |      |
|                | Inverse variance weighted | 39  | -0.041749543 | -0.11861158  | 0.035112496  | 0.28704651        |           |        |      |
|                | Weighted mode             | 39  | -0.003177142 | -0.09125887  | 0.084904583  | 0.94295991        |           |        |      |
| chronotype     | Maximum likelihood        | 146 | 0.005991991  | -0.002939601 | 0.01492358   | 0.1885378         | <0.001    | <0.001 | TRUE |

|                |               |                           |     |              |              |              |                    |           |           |      |
|----------------|---------------|---------------------------|-----|--------------|--------------|--------------|--------------------|-----------|-----------|------|
|                |               | MR Egger                  | 146 | -0.038266315 | -0.109927317 | 0.03339469   | 0.2970276          |           |           |      |
|                |               | Simple median             | 146 | 0.007529139  | -0.006173558 | 0.02123184   | 0.300374           |           |           |      |
|                |               | Weighted median           | 146 | 0.008111776  | -0.006391919 | 0.02261547   | 0.254967           |           |           |      |
|                |               | Inverse variance weighted | 146 | 0.005482428  | -0.018308425 | 0.02927328   | 0.6515084          |           |           |      |
|                |               | Weighted mode             | 146 | 0.007743118  | -0.016366569 | 0.03185281   | 0.5123816          |           |           |      |
| sleep duration |               | Maximum likelihood        | 74  | -5.34E-04    | -0.000804748 | -0.000263174 | <b>0.000111136</b> |           |           |      |
|                |               | MR Egger                  | 74  | 1.10E-03     | -0.001383183 | 0.003591613  | 0.387142634        |           |           |      |
|                |               | Simple median             | 74  | -7.48E-05    | -0.000504806 | 0.000355304  | 0.732014703        | <0.001    | <0.001    | TRUE |
|                |               | Weighted median           | 74  | -2.26E-04    | -0.000672249 | 0.000219696  | 0.336268883        |           |           |      |
|                |               | Inverse variance weighted | 74  | -4.86E-04    | -0.001155927 | 0.000184176  | 0.155241424        |           |           |      |
|                |               | Weighted mode             | 74  | -1.38E-04    | -0.000834324 | 0.000557527  | 0.722484998        |           |           |      |
| short sleep    |               | Maximum likelihood        | 24  | -0.07797563  | -0.1447359   | -0.01121533  | <b>0.02206377</b>  |           |           |      |
|                |               | MR Egger                  | 24  | 0.09715752   | -0.491987    | 0.68630204   | 0.7495739          |           |           |      |
|                |               | Simple median             | 24  | -0.05846992  | -0.1596771   | 0.04273722   | 0.26499773         | <0.001    | <0.001    | TRUE |
|                |               | Weighted median           | 24  | -0.05079837  | -0.1510096   | 0.04941282   | 0.30755548         |           |           |      |
|                |               | Inverse variance weighted | 24  | -0.08051975  | -0.2050152   | 0.04397574   | 0.20491723         |           |           |      |
|                |               | Weighted mode             | 24  | -0.03723941  | -0.1967024   | 0.12222361   | 0.6843623          |           |           |      |
| long sleep     |               | Maximum likelihood        | 9   | 0.30957458   | 0.1234155    | 0.4957337    | <b>0.001116499</b> |           |           |      |
|                |               | MR Egger                  | 9   | -0.46014741  | -2.0009176   | 1.0806227    | 0.576687727        |           |           |      |
|                |               | Simple median             | 9   | 0.22426566   | -0.0592066   | 0.5077379    | 0.119660886        | <0.001    | <0.001    | TRUE |
|                |               | Weighted median           | 9   | 0.02165576   | -0.2222934   | 0.2656049    | 0.861162421        |           |           |      |
|                |               | Inverse variance weighted | 9   | 0.27176447   | -0.2234952   | 0.7670241    | 0.28214499         |           |           |      |
|                |               | Weighted mode             | 9   | 0.01446932   | -0.2371556   | 0.2660942    | 0.901589997        |           |           |      |
| insomnia       | DHEA-sulphate | Maximum likelihood        | 19  | 0.4340476    | -0.01977657  | 0.8878719    | 0.06084944         |           |           |      |
|                |               | MR Egger                  | 19  | 1.0537166    | -0.27203667  | 2.37947      | 0.13769648         | 0.1205449 | 0.7415649 | TRUE |
|                |               | Simple median             | 19  | 0.8297585    | 0.11740915   | 1.5421078    | <b>0.02242763</b>  |           |           |      |

|                |                           |    |              |              |             |                    |             |            |       |
|----------------|---------------------------|----|--------------|--------------|-------------|--------------------|-------------|------------|-------|
|                | Weighted median           | 19 | 0.7718105    | 0.1021613    | 1.4414597   | <b>0.02388236</b>  |             |            |       |
|                | Inverse variance weighted | 19 | 0.4158449    | -0.11151594  | 0.9432057   | 0.12221629         |             |            |       |
|                | Weighted mode             | 19 | 0.8928206    | 0.08578786   | 1.6998534   | <b>0.0437778</b>   |             |            |       |
| chronotype     | Maximum likelihood        | 78 | -0.06204712  | -0.163041    | 0.03894674  | 0.228529313        |             |            |       |
|                | MR Egger                  | 78 | -0.45106162  | -0.7851213   | -0.11700197 | <b>0.009881939</b> |             |            |       |
|                | Simple median             | 78 | -0.21809108  | -0.3915591   | -0.04462303 | <b>0.013732265</b> | 6.79677E-07 | 0.02003953 | FALSE |
|                | Weighted median           | 78 | -0.25771471  | -0.4268511   | -0.08857837 | <b>0.002822174</b> |             |            |       |
|                | Inverse variance weighted | 78 | -0.05979192  | -0.1990019   | 0.07941806  | 0.399878984        |             |            |       |
|                | Weighted mode             | 78 | -0.45257868  | -0.7314553   | -0.17370206 | <b>0.002117253</b> |             |            |       |
| sleep duration | Maximum likelihood        | 41 | 0.00160786   | -0.001529309 | 0.00474503  | 0.315119299        |             |            |       |
|                | MR Egger                  | 41 | -0.011301892 | -0.024633142 | 0.002029359 | 0.104604394        |             |            |       |
|                | Simple median             | 41 | 0.008741259  | 0.003323585  | 0.014158933 | <b>0.001564731</b> | 0.003470484 | 0.01915167 | FALSE |
|                | Weighted median           | 41 | 0.005082342  | 0.000127075  | 0.010037609 | <b>0.04440336</b>  |             |            |       |
|                | Inverse variance weighted | 41 | 0.001595929  | -0.002424248 | 0.005616105 | 0.43652167         |             |            |       |
|                | Weighted mode             | 41 | 0.010124366  | 0.001570959  | 0.018677774 | <b>0.025528602</b> |             |            |       |
| short sleep    | Maximum likelihood        | 14 | -0.09363311  | -0.8737913   | 0.6865251   | 0.81402597         |             |            |       |
|                | MR Egger                  | 14 | 2.32743555   | -2.1883618   | 6.8432329   | 0.33234434         |             |            |       |
|                | Simple median             | 14 | -1.24802125  | -2.4012825   | -0.09476    | <b>0.03391782</b>  | 0.01172189  | 0.08814594 | TRUE  |
|                | Weighted median           | 14 | -0.49233287  | -1.6599611   | 0.6752953   | 0.40855562         |             |            |       |
|                | Inverse variance weighted | 14 | -0.09639891  | -1.1982975   | 1.0054997   | 0.8638547          |             |            |       |
|                | Weighted mode             | 14 | -1.34458417  | -3.3989431   | 0.7097748   | 0.22195347         |             |            |       |
| long sleep     | Maximum likelihood        | 6  | -0.9740309   | -2.970816    | 1.022754    | 0.3390282          |             |            |       |
|                | MR Egger                  | 6  | 6.1877558    | -10.123211   | 22.498722   | 0.4984507          |             |            |       |
|                | Simple median             | 6  | 0.1031285    | -3.073815    | 3.280072    | 0.9492691          | 0.1299049   | <0.001     | TRUE  |
|                | Weighted median           | 6  | -1.1271359   | -3.795227    | 1.540955    | 0.407669           |             |            |       |
|                | Inverse variance weighted | 6  | -0.9328951   | -3.459781    | 1.593991    | 0.4693066          |             |            |       |

|               |   |            |           |          |           |
|---------------|---|------------|-----------|----------|-----------|
| Weighted mode | 6 | -1.1971777 | -4.129338 | 1.734983 | 0.4598806 |
|---------------|---|------------|-----------|----------|-----------|

Italics that appear in the table indicate that the analysis is statistically significant ( $p < 0.05$ )

Supplementary table 8. Full result of MR estimation of associations between sleep traits and gonadal function (stratified by gender).

| Exposure       | Outcome | Mr methods                | No. of | $\beta$ -value | lo_95% CI    | up_95% CI   | P-value    | Q_pval     | steiger_pval | Correct causal direction |
|----------------|---------|---------------------------|--------|----------------|--------------|-------------|------------|------------|--------------|--------------------------|
|                | (Male)  |                           | SNP    |                |              |             |            |            |              |                          |
| insomnia       |         | Maximum likelihood        | 36     | -0.3801722     | -0.8538008   | 0.09345647  | 0.11566036 | 0.05681375 | <0.001       | TRUE                     |
|                |         | MR Egger                  | 36     | -1.7081807     | -3.5235489   | 0.10718752  | 0.07387158 |            |              |                          |
|                |         | Simple median             | 36     | -0.5065681     | -1.2148375   | 0.20170122  | 0.15956723 |            |              |                          |
|                |         | Weighted median           | 36     | -0.6628945     | -1.3889307   | 0.06314165  | 0.07316429 |            |              |                          |
|                |         | Inverse variance weighted | 36     | -0.3760094     | -0.9274214   | 0.17540263  | 0.18137628 |            |              |                          |
|                |         | Weighted mode             | 36     | -0.8267229     | -2.0502958   | 0.39685006  | 0.16676417 |            |              |                          |
| chronotype     |         | Maximum likelihood        | 121    | -0.08121006    | -0.2052003   | 0.04278021  | 0.1992317  | 0.03262591 | <0.001       | TRUE                     |
|                |         | MR Egger                  | 121    | -0.02643491    | -0.440204    | 0.38733422  | 0.9005602  |            |              |                          |
|                |         | Simple median             | 121    | -0.04614344    | -0.2322764   | 0.13998956  | 0.6270684  |            |              |                          |
|                |         | Weighted median           | 121    | -0.03265196    | -0.2183833   | 0.15307936  | 0.7285764  |            |              |                          |
|                |         | Inverse variance weighted | 121    | -0.07982092    | -0.2166934   | 0.05705155  | 0.2530272  |            |              |                          |
|                |         | Weighted mode             | 121    | 0.05716435     | -0.3723511   | 0.48667979  | 0.7826055  |            |              |                          |
| sleep duration | E2      | Maximum likelihood        | 66     | -2.93E-04      | -0.003947306 | 0.003362037 | 0.8752922  | 0.4569116  | <0.001       | TRUE                     |
|                |         | MR Egger                  | 66     | -2.26E-03      | -0.015468494 | 0.010940036 | 0.7378986  |            |              |                          |
|                |         | Simple median             | 66     | 6.41E-05       | -0.005069399 | 0.005197595 | 0.9803486  |            |              |                          |
|                |         | Weighted median           | 66     | 1.81E-03       | -0.003715367 | 0.0073428   | 0.5060147  |            |              |                          |
|                |         | Inverse variance weighted | 66     | -2.91E-04      | -0.003916941 | 0.003334005 | 0.8747931  |            |              |                          |
|                |         | Weighted mode             | 66     | 3.80E-03       | -0.006146742 | 0.013744303 | 0.4233148  |            |              |                          |
| short sleep    |         | Maximum likelihood        | 20     | -0.03230696    | -0.9960867   | 0.9314728   | 0.9476156  | 0.2886627  | <0.001       | TRUE                     |
|                |         | MR Egger                  | 20     | -2.35946614    | -7.1047371   | 2.3858048   | 0.3426944  |            |              |                          |
|                |         | Simple median             | 20     | -0.01068929    | -1.3101598   | 1.2887812   | 0.9871683  |            |              |                          |
|                |         | Weighted median           | 20     | -0.53622248    | -1.9021186   | 0.8296737   | 0.4235394  |            |              |                          |
|                |         | Inverse variance weighted | 20     | -0.03333811    | -1.0533002   | 0.986624    | 0.9489194  |            |              |                          |

|                |                           |     |              |              |             |                   |            |           |       |
|----------------|---------------------------|-----|--------------|--------------|-------------|-------------------|------------|-----------|-------|
| long sleep     | Weighted mode             | 20  | -1.21468596  | -3.4950371   | 1.0656651   | 0.2866184         |            |           |       |
|                | Maximum likelihood        | 8   | 0.7183858    | -1.546342    | 2.983113    | 0.5341232         |            |           |       |
|                | MR Egger                  | 8   | 3.870505     | -3.641656    | 11.382666   | 0.3515414         |            |           |       |
|                | Simple median             | 8   | 1.3822194    | -1.637518    | 4.401956    | 0.3592305         | 0.3001722  | <0.001    | TRUE  |
|                | Weighted median           | 8   | 1.5787321    | -1.4215      | 4.578964    | 0.2982402         |            |           |       |
|                | Inverse variance weighted | 8   | 0.7019091    | -1.750114    | 3.153932    | 0.574754          |            |           |       |
| insomnia       | Weighted mode             | 8   | 1.8531133    | -1.32415     | 5.030377    | 0.3152092         |            |           |       |
|                | Maximum likelihood        | 36  | 0.4454408    | -0.09649902  | 0.9873806   | 0.10718016        |            |           |       |
|                | MR Egger                  | 36  | 2.1558999    | 0.35339477   | 3.9584051   | <b>0.02504504</b> |            |           |       |
|                | Simple median             | 36  | 0.3735392    | -0.36127614  | 1.1083545   | 0.32315634        | 0.9252434  | 0.1247276 | FALSE |
|                | Weighted median           | 36  | 0.4057365    | -0.37457063  | 1.1860437   | 0.29572676        |            |           |       |
|                | Inverse variance weighted | 36  | 0.4278677    | -0.10913385  | 0.9648692   | 0.11836511        |            |           |       |
| chronotype     | Weighted mode             | 36  | 0.4750123    | -0.93132267  | 1.8813473   | 0.46731834        |            |           |       |
|                | Maximum likelihood        | 139 | -0.043077912 | -0.1764124   | 0.0902566   | 0.5265771         |            |           |       |
|                | MR Egger                  | 139 | -0.293559199 | -0.709148    | 0.12202957  | 0.1684611         |            |           |       |
|                | Simple median             | 139 | -0.005989328 | -0.1934828   | 0.18150419  | 0.9495435         | 0.9774966  | <0.001    | TRUE  |
|                | Weighted median           | 139 | -0.06301083  | -0.2522274   | 0.12620573  | 0.5202607         |            |           |       |
|                | Inverse variance weighted | 139 | -0.043007808 | -0.1752564   | 0.08924082  | 0.5238642         |            |           |       |
| sleep duration | Weighted mode             | 139 | -0.056301498 | -0.475805    | 0.36320199  | 0.7861354         |            |           |       |
|                | Maximum likelihood        | 73  | -0.003958986 | -0.0079749   | 5.69284E-05 | 0.0533329         |            |           |       |
|                | MR Egger                  | 73  | -0.006543322 | -0.0240301   | 0.01094346  | 0.46572549        |            |           |       |
|                | Simple median             | 73  | -0.004605349 | -0.010417582 | 0.001206884 | 0.11976883        | 0.02514589 | <0.001    | TRUE  |
|                | Weighted median           | 73  | -0.004737073 | -0.011230021 | 0.001755875 | 0.16012009        |            |           |       |
|                | Inverse variance weighted | 73  | -0.003930781 | -0.008530141 | 0.000668579 | 0.09391701        |            |           |       |
| short sleep    | Weighted mode             | 73  | -0.006368333 | -0.017910831 | 0.005174165 | 0.28691783        |            |           |       |
|                | Maximum likelihood        | 24  | 0.930808     | -0.07220671  | 1.933823    | 0.06892666        | 0.4921156  | 0.2721789 | FALSE |

|                |    |                           |     |              |              |              |                    |           |            |       |
|----------------|----|---------------------------|-----|--------------|--------------|--------------|--------------------|-----------|------------|-------|
|                |    | MR Egger                  | 24  | 2.7291866    | -1.90235626  | 7.360729     | 0.26050145         |           |            |       |
|                |    | Simple median             | 24  | 1.1726365    | -0.17282977  | 2.518103     | 0.09901951         |           |            |       |
|                |    | Weighted median           | 24  | 1.1833686    | -0.23027495  | 2.597012     | 0.10322907         |           |            |       |
|                |    | Inverse variance weighted | 24  | 0.8892631    | -0.09847377  | 1.877        | 0.07763183         |           |            |       |
|                |    | Weighted mode             | 24  | 1.4085084    | -1.10244794  | 3.919465     | 0.28331746         |           |            |       |
| long sleep     |    | Maximum likelihood        | 6   | -0.1270377   | -3.074641    | 2.820565     | 0.9326801          |           |            |       |
|                |    | MR Egger                  | 6   | -5.7011093   | -24.922926   | 13.520707    | 0.5922033          |           |            |       |
|                |    | Simple median             | 6   | -1.264576    | -5.128151    | 2.598998     | 0.5175617          | 0.6964111 | 0.04581202 | FALSE |
|                |    | Weighted median           | 6   | -1.1470568   | -4.700277    | 2.406163     | 0.5490133          |           |            |       |
|                |    | Inverse variance weighted | 6   | -0.1241402   | -3.047696    | 2.799416     | 0.9336722          |           |            |       |
|                |    | Weighted mode             | 6   | -1.5499058   | -6.325429    | 3.225617     | 0.5296196          |           |            |       |
| insomnia       |    | Maximum likelihood        | 39  | -0.04337423  | -0.1576056   | 0.07085716   | 0.4567423          |           |            |       |
|                |    | MR Egger                  | 39  | -0.19114806  | -1.033511    | 0.65121487   | 0.65908344         |           |            |       |
|                |    | Simple median             | 39  | -0.17834121  | -0.3744885   | 0.01780608   | 0.08679454         | <0.001    | <0.001     | TRUE  |
|                |    | Weighted median           | 39  | -0.15182732  | -0.3328799   | 0.02922529   | 0.10610887         |           |            |       |
|                |    | Inverse variance weighted | 39  | -0.0445215   | -0.2929214   | 0.2038784    | 0.72536553         |           |            |       |
|                |    | Weighted mode             | 39  | 0.11297192   | -0.2251611   | 0.45110489   | 0.50577693         |           |            |       |
| chronotype     |    | Maximum likelihood        | 146 | -0.05734206  | -0.08481603  | -0.029868084 | <b>4.29894E-05</b> |           |            |       |
|                | TT | MR Egger                  | 146 | -0.11588486  | -0.26828292  | 0.036513198  | 0.1383058          |           |            |       |
|                |    | Simple median             | 146 | -0.06655824  | -0.11341047  | -0.019706002 | <b>0.003820656</b> | <0.001    | <0.001     | TRUE  |
|                |    | Weighted median           | 146 | -0.06165849  | -0.10941358  | -0.013903394 | <b>0.009181828</b> |           |            |       |
|                |    | Inverse variance weighted | 146 | -0.05740115  | -0.10782237  | -0.006979922 | <b>0.02565947</b>  |           |            |       |
|                |    | Weighted mode             | 146 | -0.01281294  | -0.16007944  | 0.134453561  | 0.8587136          |           |            |       |
| sleep duration |    | Maximum likelihood        | 74  | -0.000860208 | -0.001722839 | 2.42266E-06  | <b>0.05064266</b>  |           |            |       |
|                |    | MR Egger                  | 74  | 0.001525054  | -0.005386691 | 0.008436799  | 0.66669411         | <0.001    | <0.001     | TRUE  |
|                |    | Simple median             | 74  | 3.91206E-05  | -0.001282451 | 0.001360692  | 0.95577691         |           |            |       |



|             |    |                           |     |              |              |             |                    |        |        |      |
|-------------|----|---------------------------|-----|--------------|--------------|-------------|--------------------|--------|--------|------|
|             |    | Weighted median           | 74  | -0.00033587  | -0.001766543 | 0.001094802 | 0.65766179         |        |        |      |
|             |    | Inverse variance weighted | 74  | -0.000840249 | -0.002685814 | 0.001005317 | 0.37220628         |        |        |      |
|             |    | Weighted mode             | 74  | -7.66976E-05 | -0.002371656 | 0.002218261 | 0.94635675         |        |        |      |
| short sleep |    | Maximum likelihood        | 24  | -0.199038999 | -0.4166915   | 0.01861354  | 0.07307184         |        |        |      |
|             |    | MR Egger                  | 24  | 0.248712711  | -1.6935406   | 2.19096606  | 0.80415486         |        |        |      |
|             |    | Simple median             | 24  | -0.006624991 | -0.3565515   | 0.34330148  | 0.97164556         | <0.001 | <0.001 | TRUE |
|             |    | Weighted median           | 24  | 0.103426739  | -0.234798    | 0.44165151  | 0.55991221         |        |        |      |
|             |    | Inverse variance weighted | 24  | -0.197344689 | -0.6068494   | 0.21216004  | 0.34489129         |        |        |      |
|             |    | Weighted mode             | 24  | 0.245031518  | -0.2892432   | 0.7793062   | 0.43250827         |        |        |      |
| long sleep  |    | Maximum likelihood        | 9   | 0.4977882    | -0.08710597  | 1.082682    | 0.09529489         |        |        |      |
|             |    | MR Egger                  | 9   | -0.9218327   | -5.42112405  | 3.577459    | 0.69997586         |        |        |      |
|             |    | Simple median             | 9   | 0.6735419    | -0.33125727  | 1.678341    | 0.17476145         | <0.001 | <0.001 | TRUE |
|             |    | Weighted median           | 9   | 0.2848059    | -0.50729401  | 1.076906    | 0.47666805         |        |        |      |
|             |    | Inverse variance weighted | 9   | 0.3986755    | -0.99375374  | 1.791105    | 0.57467455         |        |        |      |
|             |    | Weighted mode             | 9   | 0.2784519    | -0.61385342  | 1.170757    | 0.55962268         |        |        |      |
| insomnia    |    | Maximum likelihood        | 39  | 0.114157398  | -0.003446998 | 0.23176179  | 0.057099           |        |        |      |
|             |    | MR Egger                  | 39  | 0.000815497  | -0.959380325 | 0.96101132  | 0.9986808          |        |        |      |
|             |    | Simple median             | 39  | -0.142743566 | -0.325966602 | 0.04047947  | 0.1422106          | <0.001 | <0.001 | TRUE |
|             |    | Weighted median           | 39  | 0.02924869   | -0.157475646 | 0.21597303  | 0.7549059          |        |        |      |
|             |    | Inverse variance weighted | 39  | 0.112486442  | -0.170038558 | 0.39501144  | 0.4351744          |        |        |      |
|             | BT | Weighted mode             | 39  | 0.191917562  | -0.164879514 | 0.54871464  | 0.2992085          |        |        |      |
| chronotype  |    | Maximum likelihood        | 146 | -0.07286567  | -0.100173    | -0.04555834 | <b>1.69531E-07</b> |        |        |      |
|             |    | MR Egger                  | 146 | -0.07198214  | -0.2044927   | 0.06052844  | 0.2887904          |        |        |      |
|             |    | Simple median             | 146 | -0.05764647  | -0.1014993   | -0.01379361 | <b>0.007968278</b> | <0.001 | <0.001 | TRUE |
|             |    | Weighted median           | 146 | -0.0602265   | -0.1042347   | -0.01621833 | <b>0.008781858</b> |        |        |      |
|             |    | Inverse variance weighted | 146 | -0.07312827  | -0.1168643   | -0.02939221 | <b>0.001048454</b> |        |        |      |



|                | Outcome | Mr methods                | No. of | $\beta$ -value | lo_95% CI    | up_95% CI   | P-value           | Q_pval      | steiger_pval | Correct causal direction |
|----------------|---------|---------------------------|--------|----------------|--------------|-------------|-------------------|-------------|--------------|--------------------------|
| sleep duration |         | MR Egger                  | 146    | -0.033369943   | -0.101058183 | 0.0343183   | 0.3355293         |             |              |                          |
|                |         | Simple median             | 146    | 0.003606923    | -0.013868883 | 0.02108273  | 0.6838242         |             |              |                          |
|                |         | Weighted median           | 146    | 0.003999213    | -0.013975147 | 0.02197357  | 0.6606916         |             |              |                          |
|                |         | Inverse variance weighted | 146    | 0.00507012     | -0.017403923 | 0.02754416  | 0.6583634         |             |              |                          |
|                |         | Weighted mode             | 146    | 0.031868769    | -0.010392505 | 0.07413004  | 0.1745318         |             |              |                          |
|                |         | Maximum likelihood        | 74     | -0.000293886   | -0.000638198 | 5.04266E-05 | 0.09433782        |             |              |                          |
|                |         | MR Egger                  | 74     | 0.00097871     | -0.001512577 | 0.003469997 | 0.4438235         |             |              |                          |
| short sleep    |         | Simple median             | 74     | -4.96694E-05   | -0.000566131 | 0.000466792 | 0.85593922        | <0.001      | <0.001       | TRUE                     |
|                |         | Weighted median           | 74     | -0.000199111   | -0.000767714 | 0.000369493 | 0.51609691        |             |              |                          |
|                |         | Inverse variance weighted | 74     | -0.000286722   | -0.000954272 | 0.000380829 | 0.39987404        |             |              |                          |
|                |         | Weighted mode             | 74     | -0.000275592   | -0.001131157 | 0.000579973 | 0.51919963        |             |              |                          |
|                |         | Maximum likelihood        | 24     | -0.05306783    | -0.13863628  | 0.03250061  | 0.2241554         |             |              |                          |
|                |         | MR Egger                  | 24     | 0.21904419     | -0.30768597  | 0.74577436  | 0.4237636         |             |              |                          |
|                |         | Simple median             | 24     | 0.04730952     | -0.07813012  | 0.17274916  | 0.4540209         | 0.008564053 | <0.001       | TRUE                     |
| long sleep     |         | Weighted median           | 24     | 0.05596868     | -0.06455327  | 0.17649063  | 0.3596129         |             |              |                          |
|                |         | Inverse variance weighted | 24     | -0.0549102     | -0.16812843  | 0.05830804  | 0.3418132         |             |              |                          |
|                |         | Weighted mode             | 24     | 0.09501926     | -0.11039763  | 0.30043615  | 0.3813208         |             |              |                          |
|                |         | Maximum likelihood        | 9      | 0.238823328    | 0.01336936   | 0.4642773   | <b>0.03787292</b> |             |              |                          |
|                |         | MR Egger                  | 9      | -0.003688951   | -1.57509241  | 1.5677145   | 0.99645717        |             |              |                          |
|                |         | Simple median             | 9      | 0.097634128    | -0.28450706  | 0.4797753   | 0.59650637        | <0.001      | <0.001       | TRUE                     |
|                |         | Weighted median           | 9      | 0.013899745    | -0.3044996   | 0.3322991   | 0.93224553        |             |              |                          |
| insomnia       | E2      | Inverse variance weighted | 9      | 0.216785548    | -0.25831454  | 0.6918856   | 0.37114151        |             |              |                          |
|                |         | Weighted mode             | 9      | 0.008901591    | -0.34566997  | 0.3634732   | 0.95966622        |             |              |                          |
|                |         | Maximum likelihood        | 36     | -0.013701117   | -0.4540486   | 0.4266464   | 0.9513719         | 0.2412416   | <0.001       | TRUE                     |

|                |                           |     |              |              |              |                   |           |        |      |
|----------------|---------------------------|-----|--------------|--------------|--------------|-------------------|-----------|--------|------|
|                | MR Egger                  | 36  | 0.076485812  | -1.4979221   | 1.6508937    | 0.9247006         |           |        |      |
|                | Simple median             | 36  | -0.003419624 | -0.6449811   | 0.6381418    | 0.9916796         |           |        |      |
|                | Weighted median           | 36  | -0.269555463 | -0.9566279   | 0.4175169    | 0.4319337         |           |        |      |
|                | Inverse variance weighted | 36  | -0.013325868 | -0.4806053   | 0.4539536    | 0.9554253         |           |        |      |
|                | Weighted mode             | 36  | -0.31916013  | -1.3921708   | 0.7538506    | 0.5405469         |           |        |      |
| chronotype     | Maximum likelihood        | 121 | -0.120998638 | -0.236846    | -0.005151292 | <b>0.04064299</b> |           |        |      |
|                | MR Egger                  | 121 | -0.384823283 | -0.7398531   | -0.029793478 | <b>0.03569931</b> |           |        |      |
|                | Simple median             | 121 | -0.008074901 | -0.1831688   | 0.167018988  | 0.92646295        | 0.3165679 | <0.001 | TRUE |
|                | Weighted median           | 121 | -0.030894921 | -0.2073956   | 0.145605771  | 0.72518333        |           |        |      |
|                | Inverse variance weighted | 121 | -0.119875322 | -0.2376392   | -0.002111469 | <b>0.04602737</b> |           |        |      |
|                | Weighted mode             | 121 | 0.061485928  | -0.3409723   | 0.463944161  | 0.77404898        |           |        |      |
| sleep duration | Maximum likelihood        | 67  | -0.000214349 | -0.003613315 | 0.003184617  | 0.9016292         |           |        |      |
|                | MR Egger                  | 67  | -0.003204425 | -0.016452241 | 0.01004339   | 0.6370236         |           |        |      |
|                | Simple median             | 67  | -0.002454525 | -0.00737215  | 0.0024631    | 0.3505306         | 0.1697931 | <0.001 | TRUE |
|                | Weighted median           | 67  | -0.00255493  | -0.007502952 | 0.002393093  | 0.3139279         |           |        |      |
|                | Inverse variance weighted | 67  | -0.000209759 | -0.003825291 | 0.003405772  | 0.9094663         |           |        |      |
|                | Weighted mode             | 67  | -0.004771599 | -0.015254453 | 0.005711255  | 0.3803606         |           |        |      |
| short sleep    | Maximum likelihood        | 20  | -0.7552043   | -1.660771    | 0.1503627    | 0.10214203        |           |        |      |
|                | MR Egger                  | 20  | -0.7433397   | -5.465391    | 3.9787118    | 0.76121316        |           |        |      |
|                | Simple median             | 20  | -1.097816    | -2.345498    | 0.149866     | 0.09437796        | 0.2336092 | <0.001 | TRUE |
|                | Weighted median           | 20  | -0.8616166   | -2.204785    | 0.4815519    | 0.18568356        |           |        |      |
|                | Inverse variance weighted | 20  | -0.7738958   | -1.754358    | 0.2065661    | 0.1218482         |           |        |      |
|                | Weighted mode             | 20  | -1.3005487   | -3.999749    | 1.3986514    | 0.33232649        |           |        |      |
| long sleep     | Maximum likelihood        | 8   | -0.1566956   | -2.297931    | 1.984539     | 0.8859483         |           |        |      |
|                | MR Egger                  | 8   | -0.3057841   | -8.265417    | 7.653849     | 0.9424262         | 0.2244327 | <0.001 | TRUE |
|                | Simple median             | 8   | 0.4255886    | -2.78198     | 3.633158     | 0.7887298         |           |        |      |

|                |    |                           |     |              |             |             |            |           |           |       |
|----------------|----|---------------------------|-----|--------------|-------------|-------------|------------|-----------|-----------|-------|
|                |    | Weighted median           | 8   | -0.8360996   | -3.676862   | 2.004663    | 0.5661273  |           |           |       |
|                |    | Inverse variance weighted | 8   | -0.1526249   | -2.586886   | 2.281637    | 0.9021947  |           |           |       |
|                |    | Weighted mode             | 8   | -1.3672494   | -4.92129    | 2.186791    | 0.4703211  |           |           |       |
| insomnia       |    | Maximum likelihood        | 36  | -0.5818246   | -1.523769   | 0.36011979  | 0.226025   |           |           |       |
|                |    | MR Egger                  | 36  | -2.7895559   | -6.147424   | 0.56831252  | 0.11269946 |           |           |       |
|                |    | Simple median             | 36  | -0.9906514   | -2.378741   | 0.39743862  | 0.16945864 | 0.1635432 | <0.001    | TRUE  |
|                |    | Weighted median           | 36  | -1.3064811   | -2.686536   | 0.07357409  | 0.06623774 |           |           |       |
|                |    | Inverse variance weighted | 36  | -0.6066532   | -1.636256   | 0.42294972  | 0.24815052 |           |           |       |
|                |    | Weighted mode             | 36  | -2.0116583   | -4.296405   | 0.27308881  | 0.07641467 |           |           |       |
| chronotype     |    | Maximum likelihood        | 140 | -0.009215721 | -0.2379416  | 0.2195102   | 0.9370553  |           |           |       |
|                |    | MR Egger                  | 140 | 0.416453408  | -0.2813143  | 1.1142211   | 0.2440979  |           |           |       |
|                |    | Simple median             | 140 | -0.04928673  | -0.3858058  | 0.2872324   | 0.7731433  | 0.3181515 | <0.001    | TRUE  |
|                |    | Weighted median           | 140 | -0.053655353 | -0.3987777  | 0.291467    | 0.74984    |           |           |       |
|                |    | Inverse variance weighted | 140 | -0.009185371 | -0.2412937  | 0.2229229   | 0.9381746  |           |           |       |
|                | P4 | Weighted mode             | 140 | -0.107126542 | -0.8515015  | 0.6372484   | 0.7692523  |           |           |       |
| sleep duration |    | Maximum likelihood        | 73  | -0.003929473 | -0.01085435 | 0.002995406 | 0.2660574  |           |           |       |
|                |    | MR Egger                  | 73  | -0.004091021 | -0.03009795 | 0.02191591  | 0.7587433  |           |           |       |
|                |    | Simple median             | 73  | -0.005328219 | -0.01528808 | 0.004631645 | 0.3039339  | 0.9059213 | <0.001    | TRUE  |
|                |    | Weighted median           | 73  | -0.001317565 | -0.01134659 | 0.008711465 | 0.8050515  |           |           |       |
|                |    | Inverse variance weighted | 73  | -0.003900308 | -0.01076057 | 0.002959956 | 0.2651373  |           |           |       |
|                |    | Weighted mode             | 73  | 0.002820718  | -0.01503813 | 0.020679568 | 0.7766522  |           |           |       |
| short sleep    |    | Maximum likelihood        | 24  | 1.5988393    | -0.1397256  | 3.337404    | 0.07147022 |           |           |       |
|                |    | MR Egger                  | 24  | -2.3127248   | -10.3369518 | 5.711502    | 0.57785266 |           |           |       |
|                |    | Simple median             | 24  | 0.8639427    | -1.6291432  | 3.357029    | 0.47795842 | 0.6798744 | 0.1322473 | FALSE |
|                |    | Weighted median           | 24  | 0.6555895    | -1.7082927  | 3.019472    | 0.6037462  |           |           |       |
|                |    | Inverse variance weighted | 24  | 1.5367551    | -0.1788629  | 3.252373    | 0.07914667 |           |           |       |

|                |  |                           |     |              |              |              |                    |           |            |       |
|----------------|--|---------------------------|-----|--------------|--------------|--------------|--------------------|-----------|------------|-------|
| long sleep     |  | Weighted mode             | 24  | -0.8918695   | -5.7067644   | 3.923025     | 0.72472734         |           |            |       |
|                |  | Maximum likelihood        | 6   | 1.666185     | -3.419312    | 6.751682     | 0.5207668          |           |            |       |
|                |  | MR Egger                  | 6   | 10.526407    | -22.62816    | 43.680974    | 0.5674676          |           |            |       |
|                |  | Simple median             | 6   | 2.736075     | -3.528787    | 9.000937     | 0.3892463          | 0.9766896 | 0.07133074 | FALSE |
|                |  | Weighted median           | 6   | 2.024152     | -4.176043    | 8.224347     | 0.5150211          |           |            |       |
|                |  | Inverse variance weighted | 6   | 1.65919      | -3.409379    | 6.727758     | 0.5211306          |           |            |       |
| insomnia       |  | Weighted mode             | 6   | 2.496684     | -4.926011    | 9.91938      | 0.5209225          |           |            |       |
|                |  | Maximum likelihood        | 39  | -0.05007972  | -0.151665    | 0.05150557   | 0.3339218          |           |            |       |
|                |  | MR Egger                  | 39  | -0.32635322  | -0.8458575   | 0.19315104   | 0.2259894          |           |            |       |
|                |  | Simple median             | 39  | -0.03886362  | -0.193677    | 0.11594974   | 0.620103           | <0.001    | <0.001     | TRUE  |
|                |  | Weighted median           | 39  | -0.01338834  | -0.1672179   | 0.14044118   | 0.8681523          |           |            |       |
|                |  | Inverse variance weighted | 39  | -0.05058073  | -0.2058841   | 0.10472268   | 0.5232446          |           |            |       |
| chronotype     |  | Weighted mode             | 39  | -0.0128513   | -0.2454215   | 0.21971891   | 0.913285           |           |            |       |
|                |  | Maximum likelihood        | 146 | -0.07732002  | -0.10250245  | -0.052137597 | <b>1.76611E-09</b> |           |            |       |
|                |  | MR Egger                  | 146 | -0.16467865  | -0.2863981   | -0.042959202 | <b>0.008904877</b> |           |            |       |
|                |  | Simple median             | 146 | -0.03906748  | -0.08101624  | 0.002881288  | 0.06221227         | <0.001    | <0.001     | TRUE  |
|                |  | Weighted median           | 146 | -0.04994593  | -0.09227952  | -0.007612337 | <b>0.01853139</b>  |           |            |       |
|                |  | Inverse variance weighted | 146 | -0.07507888  | -0.1155102   | -0.034647559 | <b>0.000273042</b> |           |            |       |
| sleep duration |  | Weighted mode             | 146 | -0.04563833  | -0.1738936   | 0.082616936  | 0.4577044          |           |            |       |
|                |  | Maximum likelihood        | 74  | 0.000836725  | 6.45935E-05  | 0.001608857  | <b>0.03367301</b>  |           |            |       |
|                |  | MR Egger                  | 74  | -0.001138793 | -0.005874418 | 0.003596832  | 0.63883136         |           |            |       |
|                |  | Simple median             | 74  | 0.000663514  | -0.000564749 | 0.001891778  | 0.29255172         | <0.001    | <0.001     | TRUE  |
|                |  | Weighted median           | 74  | 6.71523E-05  | -0.001235675 | 0.001369979  | 0.91670671         |           |            |       |
|                |  | Inverse variance weighted | 74  | 0.000815809  | -0.000452425 | 0.002084042  | 0.20738205         |           |            |       |
| short sleep    |  | Weighted mode             | 74  | -0.000986121 | -0.003163532 | 0.00119129   | 0.42958875         |           |            |       |
|                |  | Maximum likelihood        | 24  | 0.2766455    | 0.07852493   | 0.474766     | <b>0.006203158</b> | <0.001    | <0.001     | TRUE  |

|                |    |                           |     |             |              |              |                    |          |        |      |
|----------------|----|---------------------------|-----|-------------|--------------|--------------|--------------------|----------|--------|------|
|                |    | MR Egger                  | 24  | 1.3737418   | -0.01277082  | 2.7602545    | 0.065056253        |          |        |      |
|                |    | Simple median             | 24  | 0.2102255   | -0.072068    | 0.4925189    | 0.160568314        |          |        |      |
|                |    | Weighted median           | 24  | 0.2039718   | -0.08720097  | 0.4951445    | 0.187417014        |          |        |      |
|                |    | Inverse variance weighted | 24  | 0.2609413   | -0.04575757  | 0.5676403    | 0.095399088        |          |        |      |
|                |    | Weighted mode             | 24  | 0.1279942   | -0.35785567  | 0.613844     | 0.622298544        |          |        |      |
| long sleep     |    | Maximum likelihood        | 9   | 0.2828789   | -0.2011838   | 0.7669415    | 0.2520459          |          |        |      |
|                |    | MR Egger                  | 9   | -0.2137407  | -1.691148    | 1.2636665    | 0.7849518          |          |        |      |
|                |    | Simple median             | 9   | 0.4408252   | -0.2796305   | 1.161281     | 0.2124353          | 0.796466 | <0.001 | TRUE |
|                |    | Weighted median           | 9   | 0.4414103   | -0.1932288   | 1.0760495    | 0.1625541          |          |        |      |
|                |    | Inverse variance weighted | 9   | 0.2749532   | -0.2050719   | 0.7549782    | 0.261579           |          |        |      |
|                |    | Weighted mode             | 9   | 0.4055893   | -0.4478366   | 1.2590153    | 0.408092           |          |        |      |
| insomnia       |    | Maximum likelihood        | 39  | 0.02588994  | -0.06521119  | 0.11699106   | 0.5775203          |          |        |      |
|                |    | MR Egger                  | 39  | -0.08884934 | -0.5012813   | 0.32358262   | 0.6752944          |          |        |      |
|                |    | Simple median             | 39  | -0.07809634 | -0.22560184  | 0.06940917   | 0.2907931          | <0.001   | <0.001 | TRUE |
|                |    | Weighted median           | 39  | -0.06688498 | -0.209592    | 0.07582203   | 0.3596209          |          |        |      |
|                |    | Inverse variance weighted | 39  | 0.0248879   | -0.09695058  | 0.14672638   | 0.6888852          |          |        |      |
|                |    | Weighted mode             | 39  | -0.12966151 | -0.36085686  | 0.10153385   | 0.2499415          |          |        |      |
| chronotype     |    | Maximum likelihood        | 146 | -0.05030911 | -0.07328152  | -0.027336702 | <b>1.76784E-05</b> |          |        |      |
|                | BT | MR Egger                  | 146 | -0.06478476 | -0.19440772  | 0.064838192  | 0.3289285          |          |        |      |
|                |    | Simple median             | 146 | -0.06389548 | -0.10071453  | -0.027076417 | <b>0.000367638</b> | <0.001   | <0.001 | TRUE |
|                |    | Weighted median           | 146 | -0.08255253 | -0.11915499  | -0.045950059 | <b>1.89663E-05</b> |          |        |      |
|                |    | Inverse variance weighted | 146 | -0.05016831 | -0.09290653  | -0.007430089 | <b>0.02140586</b>  |          |        |      |
|                |    | Weighted mode             | 146 | -0.11552386 | -0.19507323  | -0.03597449  | <b>0.001626817</b> |          |        |      |
| sleep duration |    | Maximum likelihood        | 74  | 0.001440353 | 0.00074517   | 0.002135537  | <b>4.88773E-05</b> |          |        |      |
|                |    | MR Egger                  | 74  | 7.04936E-06 | -0.004129297 | 0.004143396  | 0.997344           | <0.001   | <0.001 | TRUE |
|                |    | Simple median             | 74  | 0.001515015 | 0.000384672  | 0.002645357  | <b>0.004331445</b> |          |        |      |

|             |      |                           |     |              |              |             |                    |          |        |      |
|-------------|------|---------------------------|-----|--------------|--------------|-------------|--------------------|----------|--------|------|
|             |      | Weighted median           | 74  | 0.001572143  | 0.000420633  | 0.002723654 | <b>0.005846747</b> |          |        |      |
|             |      | Inverse variance weighted | 74  | 0.001425547  | 0.00031976   | 0.002531334 | <b>0.01151163</b>  |          |        |      |
|             |      | Weighted mode             | 74  | 0.002061779  | -1.15391E-05 | 0.004135097 | <b>0.04574852</b>  |          |        |      |
| short sleep |      | Maximum likelihood        | 24  | 0.2165086    | 0.03589388   | 0.3971234   | <b>0.01879793</b>  |          |        |      |
|             |      | MR Egger                  | 24  | 0.3348712    | -1.16686826  | 1.8366108   | 0.66632915         |          |        |      |
|             |      | Simple median             | 24  | 0.1760969    | -0.09627332  | 0.4484672   | 0.2131011          | <0.001   | <0.001 | TRUE |
|             |      | Weighted median           | 24  | 0.1463024    | -0.1424724   | 0.4350771   | 0.28507261         |          |        |      |
|             |      | Inverse variance weighted | 24  | 0.1977774    | -0.11671334  | 0.5122682   | 0.21772217         |          |        |      |
|             |      | Weighted mode             | 24  | 0.143138     | -0.33985844  | 0.6261344   | 0.58772338         |          |        |      |
| long sleep  |      | Maximum likelihood        | 9   | 0.0610509    | -0.38838287  | 0.5104847   | 0.79005007         |          |        |      |
|             |      | MR Egger                  | 9   | 1.7246724    | -0.09911956  | 3.5484644   | 0.10622357         |          |        |      |
|             |      | Simple median             | 9   | 0.52867507   | -0.21298887  | 1.270339    | 0.14066787         | 0.012017 | <0.001 | TRUE |
|             |      | Weighted median           | 9   | 0.61574995   | 0.02783876   | 1.2036611   | <b>0.03869976</b>  |          |        |      |
|             |      | Inverse variance weighted | 9   | 0.05682341   | -0.62276529  | 0.7364121   | 0.86982228         |          |        |      |
|             |      | Weighted mode             | 9   | 0.61915885   | 0.02888676   | 1.2094309   | 0.06784479         |          |        |      |
| insomnia    |      | Maximum likelihood        | 39  | -0.04141687  | -0.09349476  | 0.01066102  | 0.1190526          |          |        |      |
|             |      | MR Egger                  | 39  | -0.17040557  | -0.49002774  | 0.1492166   | 0.302817           |          |        |      |
|             |      | Simple median             | 39  | -0.03601269  | -0.11887415  | 0.04684876  | 0.4053931          | <0.001   | <0.001 | TRUE |
|             |      | Weighted median           | 39  | -0.03334873  | -0.12159351  | 0.05489605  | 0.4473736          |          |        |      |
|             |      | Inverse variance weighted | 39  | -0.04212378  | -0.13712576  | 0.0528782   | 0.3848132          |          |        |      |
|             | SHBG | Weighted mode             | 39  | -0.03631255  | -0.15732903  | 0.08470393  | 0.558711           |          |        |      |
| chronotype  |      | Maximum likelihood        | 146 | 0.005091709  | -0.007981119 | 0.01816454  | 0.44522707         |          |        |      |
|             |      | MR Egger                  | 146 | -0.035178371 | -0.121051082 | 0.05069434  | 0.42333959         |          |        |      |
|             |      | Simple median             | 146 | 0.020203354  | -0.000325956 | 0.04073267  | 0.05628266         | <0.001   | <0.001 | TRUE |
|             |      | Weighted median           | 146 | 0.010818454  | -0.011024343 | 0.03266125  | 0.31115015         |          |        |      |
|             |      | Inverse variance weighted | 146 | 0.004934599  | -0.023479021 | 0.03334822  | 0.73356016         |          |        |      |



|                |                           |     |              |              |            |                           |        |        |      |
|----------------|---------------------------|-----|--------------|--------------|------------|---------------------------|--------|--------|------|
| sleep duration | Weighted mode             | 146 | 0.020590949  | -0.018415373 | 0.05959727 | 0.32903588                |        |        |      |
|                | Maximum likelihood        | 74  | -0.000850561 | -0.001248368 | -4.53E-04  | <b><i>2.7808E-05</i></b>  |        |        |      |
|                | MR Egger                  | 74  | 0.00151032   | -0.001465585 | 4.49E-03   | <b><i>0.3231982</i></b>   |        |        |      |
|                | Simple median             | 74  | -0.000715985 | -0.0013897   | -4.23E-05  | <b><i>0.02515924</i></b>  | <0.001 | <0.001 | TRUE |
|                | Weighted median           | 74  | 2.03508E-05  | -0.000644735 | 6.85E-04   | 0.9542575                 |        |        |      |
|                | Inverse variance weighted | 74  | -0.000795274 | -0.001602096 | 1.15E-05   | 0.05336589                |        |        |      |
| short sleep    | Weighted mode             | 74  | 0.000410732  | -0.000726635 | 1.55E-03   | 0.4397475                 |        |        |      |
|                | Maximum likelihood        | 24  | -0.08768617  | -0.1878169   | 0.01244457 | 0.08608795                |        |        |      |
|                | MR Egger                  | 24  | -0.22346265  | -0.9682575   | 0.52133223 | 0.56247829                |        |        |      |
|                | Simple median             | 24  | -0.1185447   | -0.2606237   | 0.02353432 | 0.1284589                 | <0.001 | <0.001 | TRUE |
|                | Weighted median           | 24  | -0.08440664  | -0.2339331   | 0.06511986 | 0.26186904                |        |        |      |
|                | Inverse variance weighted | 24  | -0.08223548  | -0.2386892   | 0.07421825 | 0.30290741                |        |        |      |
| long sleep     | Weighted mode             | 24  | -0.13465847  | -0.4044731   | 0.13515615 | 0.35039649                |        |        |      |
|                | Maximum likelihood        | 9   | 0.4352779    | 0.1644176    | 0.7061382  | <b><i>0.001634054</i></b> |        |        |      |
|                | MR Egger                  | 9   | -0.80821178  | -2.3554896   | 0.7390661  | 0.34000437                |        |        |      |
|                | Simple median             | 9   | 0.09434516   | -0.2765125   | 0.4652029  | 0.635273351               | <0.001 | <0.001 | TRUE |
|                | Weighted median           | 9   | 0.08346259   | -0.2360584   | 0.4029836  | 0.612361542               |        |        |      |
|                | Inverse variance weighted | 9   | 0.37208904   | -0.1726108   | 0.9167889  | 0.180605658               |        |        |      |
|                | Weighted mode             | 9   | 0.02993103   | -0.3022673   | 0.3621294  | 0.878036377               |        |        |      |

Italics that appear in the table indicate that the analysis is statistically significant ( $p < 0.05$ )
